# Supplementary material for: Stabilization of reactive rare earth alkyl complexes through mechanistic studies
Source: Royal Society of Chemistry journal article supplement (doi:10.1039/d4sc05983b), 2024-11-25
Supplement: d4sc05983b1.pdf [file d4sc05983b1.pdf]

**ELECTRONIC SUPPLEMENTARY INFORMATION**

**Stabilization of Reactive Rare Earth Alkyl Complexes through  
Mechanistic Studies**

Elias Tanuhadi<sup>†,‡</sup>, Anna S. Bair<sup>†,‡</sup>, Mary Johnson<sup>†,‡</sup>, Philip Fontaine<sup>||</sup>, Jerzy Klosin<sup>||\*</sup>,  
Sudipta Pal<sup>||</sup>, and Polly L. Arnold<sup>†,‡,\*</sup>

<sup>†</sup> Dept of Chemistry, University of California, Berkeley, Berkeley, CA, 94720, USA. E-mail: pla@berkeley.edu

<sup>‡</sup> Chemical Sciences Division, Lawrence Berkeley National Laboratory, Berkeley, CA 94720, USA

<sup>||</sup> Corporate R&D, The Dow Chemical Company, Midland, Michigan 48674, USA; E-mail: jklosin@dow.com

# Content

|                                                                                                                                                                        |    |
|------------------------------------------------------------------------------------------------------------------------------------------------------------------------|----|
| <b>1. General Information</b> .....                                                                                                                                    | 4  |
| <b>2. Additional Synthesis Procedures and Characterization</b> .....                                                                                                   | 5  |
| 2.1. Synthesis of $d_2$ -(chloromethyl)trimethylsilane ( $\text{ClCD}_2\text{Si}(\text{CH}_3)_3$ ) .....                                                               | 5  |
| 2.2. Synthesis of $d_2$ -((trimethylsilyl)methyl)lithium ( $\text{LiCD}_2\text{Si}(\text{CH}_3)_3$ ) .....                                                             | 7  |
| 2.3. $\text{Sm}(\text{CH}_2\text{SiMe}_3)_3(\text{C}_6\text{H}_{14}\text{O}_3)$ ( <b>Sm-G<sub>2</sub></b> ) .....                                                      | 9  |
| 2.4. $\text{Y}(\text{CH}_2\text{SiMe}_3)_3(\text{C}_6\text{H}_{14}\text{O}_3)$ ( <b>Y-G<sub>2</sub></b> ) .....                                                        | 11 |
| 2.5. $\text{Lu}(\text{CH}_2\text{SiMe}_3)_3(\text{C}_6\text{H}_{14}\text{O}_3)$ ( <b>Lu-G<sub>2</sub></b> ).....                                                       | 12 |
| 2.6. $\text{Sc}(\text{CH}_2\text{SiMe}_3)_3(\text{C}_6\text{H}_{14}\text{O}_3)$ ( <b>Sc-G<sub>2</sub></b> ) .....                                                      | 13 |
| 2.7. $\text{Sm}(\text{CH}_2\text{SiMe}_3)_3(\text{CH}_3(\text{OCH}_2\text{CH}_2)_3\text{O})$ ( <b>Sm-G<sub>3</sub></b> ) .....                                         | 14 |
| 2.8. $\text{Y}(\text{CH}_2\text{SiMe}_3)_3((\text{OCH}_2\text{CH}_2)_3\text{O})$ ( <b>Y-G<sub>3</sub></b> ) .....                                                      | 15 |
| 2.9. $\text{Lu}(\text{CH}_2\text{SiMe}_3)_3((\text{OCH}_2\text{CH}_2)_3\text{O})$ ( <b>Lu-G<sub>3</sub></b> ).....                                                     | 16 |
| 2.10. $\text{Sm}(\text{CH}_2\text{SiMe}_3)_3(\text{Me}_2\text{NCH}_2\text{CH}_2\text{NMe}_2)$ ( <b>Sm-TMEDA</b> ).....                                                 | 17 |
| 2.11. $\text{Lu}(\text{CH}_2\text{SiMe}_3)_3(\text{Me}_2\text{NCH}_2\text{CH}_2\text{NMe}_2)$ ( <b>Lu-TMEDA</b> ) .....                                                | 18 |
| 2.12. $\text{Sc}(\text{CH}_2\text{SiMe}_3)_3(\text{Me}_2\text{NCH}_2\text{CH}_2\text{NMe}_2)$ ( <b>Sc-TMEDA</b> ) .....                                                | 19 |
| 2.13. $\text{Lu}(\text{CH}_2\text{SiMe}_3)_3(\text{C}_6\text{H}_{16}\text{P}_2)(\text{C}_4\text{H}_8\text{O})$ ( <b>Lu-DMPE</b> ).....                                 | 20 |
| 2.14. $\text{Sc}(\text{CH}_2\text{SiMe}_3)_3(\text{C}_6\text{H}_{16}\text{P}_2)$ ( <b>Sc-DMPE</b> ) .....                                                              | 21 |
| 2.15. Synthesis of LiCl-free $\text{Y}(\text{CH}_2\text{SiMe}_3)_3(\text{C}_4\text{H}_8\text{O})_2$ ( <b>Y-THF</b> ) .....                                             | 23 |
| <b>3. Single-Crystal X-ray Diffraction Data (SXRD)</b> .....                                                                                                           | 24 |
| <b>4. Thermal stability studies</b> .....                                                                                                                              | 36 |
| 4.1. General procedure for thermolysis studies .....                                                                                                                   | 36 |
| <b>5. Isotope labelling and speciation studies</b> .....                                                                                                               | 42 |
| 5.1 Synthesis of $\text{Lu}(\text{CD}_2\text{SiMe}_3)_3(\text{C}_4\text{H}_8\text{O})_2$ ( $d_2$ - <b>Lu-THF</b> ).....                                                | 45 |
| 5.2. Synthesis of $\text{Lu}(\text{CH}_2\text{Si}(\text{CD}_3)_3)_3(\text{C}_4\text{H}_8\text{O})_2$ ( $d_9$ - <b>Lu-THF</b> ).....                                    | 45 |
| 5.3. Synthesis of $\text{Lu}(\text{CH}_2\text{Si}(\text{CD}_3)_3)_3(\text{C}_6\text{H}_{14}\text{O}_3)$ ( $d_9$ - <b>Lu-G<sub>2</sub></b> ) .....                      | 45 |
| 5.4. Synthesis of $\text{Lu}(\text{CH}_2\text{Si}(\text{CD}_3)_3)_3(\text{C}_6\text{H}_{16}\text{P}_2)(\text{C}_4\text{H}_8\text{O})$ ( $d_9$ - <b>Lu-DMPE</b> ) ..... | 45 |
| 5.5. Synthesis of $\text{Lu}(\text{CH}_2\text{Si}(\text{CD}_3)_3)_3(\text{Me}_2\text{NCH}_2\text{CH}_2\text{NMe}_2)$ ( $d_9$ - <b>Lu-TMEDA</b> ).....                  | 45 |
| 5.6. General procedure for alkyl crossover studies .....                                                                                                               | 47 |
| <b>6. Impact of LiCl on thermal stability of <math>\text{M}(\text{r})_3(\text{THF})_2</math> <math>\text{M} = \text{Y}, \text{Lu}</math></b> .....                     | 48 |
| 6.1 General procedure for speciation studies .....                                                                                                                     | 49 |
| 6.2. General procedure for LiCl spiking experiments.....                                                                                                               | 52 |
| <b>7. References</b> .....                                                                                                                                             | 57 |

## Compound numbering

---

known:

$M(r)_3(\text{THF})_2$ ;  $M = \text{Sm(III)}, \text{Y(III)}, \text{Lu(III)}, \text{Sc(III)}$

$Y(r)_3(\text{donor})$ ; donor = (DMPE)(THF), TMEDA

new:

$M(r)_3(\text{C}_6\text{H}_{14}\text{O}_3)$  (**M-G<sub>2</sub>**);  $M = \text{Sm(III)}, \text{Y(III)}, \text{Lu(III)}, \text{Sc(III)}$ ;

$M(\text{CH}_2\text{SiMe}_3)_3(\text{C}_8\text{H}_{18}\text{O}_4)$  (**M-G<sub>3</sub>**);  $M = \text{Sm(III)}, \text{Y(III)}, \text{Lu(III)}$ ;

$M(\text{CH}_2\text{SiMe}_3)_3(\text{Me}_2\text{NCH}_2\text{CH}_2\text{NMe}_2)$  (**M-TMEDA**);  $M = \text{Sm(III)}, \text{Lu(III)}, \text{Sc(III)}$

$M(\text{CH}_2\text{SiMe}_3)_3(\text{C}_6\text{H}_{16}\text{P}_2)(\text{C}_4\text{H}_8\text{O})_n$  (**M-DMPE**);  $M = \text{Lu(III)}, n = 1; \text{Sc(III)}, n = 0$

G<sub>2</sub> = diglyme,  $(\text{CH}_3(\text{OCH}_2\text{CH}_2)_2\text{O})$

G<sub>3</sub> = triglyme  $(\text{CH}_3(\text{OCH}_2\text{CH}_2)_3\text{O})$

# 1. General Information

NMR spectra were recorded on Bruker AVQ 400 and 600 MHz spectrometers and are referenced to residual protio solvent for  $^1\text{H}$  NMR spectroscopy.  $\text{C}_6\text{D}_6$  was used as solvent for NMR spectroscopic experiments, and was referenced to added hexamethylbenzene (HMB) (2.12 ppm for both  $^1\text{H}$  and  $^{13}\text{C}$  NMR spectroscopic experiments). Chemical shifts are quoted in ppm and coupling constants in Hz. NMR spectra were taken at  $25^\circ\text{C}$ . Quantitative  $^1\text{H}$  NMR data were acquired with the delay time set to 5x the longest  $T_1$  value present.

*Elemental analysis:* Elemental analyses were carried out by Dr Elena Kreimer at the microanalytic services in the College of Chemistry at the University of California, Berkeley.

*Single crystal X-ray diffraction (SXRD):* Single crystal X-ray diffraction data of **LuG<sub>3</sub>** were collected using a Rigaku XtaLab P200 diffractometer fitted with a Pilatus3 R 200K-A Shutterless Detector and using a MicroMax 007HF Dual Rotating Anode (MoK $\alpha$  radiation) at 150 K. X-ray diffraction data of all other compounds were collected using a Rigaku Xtalab Synergy-S diffractometer fitted with a HyPix-6000HE photon counting detector using MoK $\alpha$  ( $\lambda = 0.71073 \text{ \AA}$ ) or CuK $\alpha$  ( $\lambda = 0.15418 \text{ \AA}$ ) radiation. All structures were solved using SHELXT in Olex2 and refined using SHELXL in Olex2.<sup>6,7</sup> Absorption corrections were completed using CrysAlis PRO (Rigaku Oxford Diffraction) software. Analytical numeric absorption corrections used a multifaceted crystal model based on expressions derived by Clark and Reid.<sup>8</sup> Numerical absorption correction was based on a Gaussian integration over a multifaceted crystal model.

## 2. Additional Synthesis Procedures and Characterization

### 2.1. Synthesis of $d_2$ -(chloromethyl)trimethylsilane ( $\text{ClCD}_2\text{Si}(\text{CH}_3)_3$ )

To a stirred solution of  $d_2$ -chloriodomethane (1 g, 5.6 mmol, 1 eq.) and chlorotrimethylsilane (TMSCl, 0.913 g; 8.4 mmol, 1.5 eq.) in THF (5 mL), methyllithium,  $\text{CH}_3\text{Li}$  (MeLi) [1.6 M in  $\text{Et}_2\text{O}$ ] (7.9 mL, 12.6 mmol; 2.25 eq.) was added dropwise at  $-78^\circ\text{C}$ . The resulting reaction mixture was stirred for 90 min. at  $-78^\circ\text{C}$  followed by separation of the volatile product from any solids by vacuum transfer.  $\text{Et}_2\text{O}$  was removed under reduced pressure. Residual THF was removed by extraction of the product into hexanes (hexanes/ $\text{H}_2\text{O}$ ). The combined hexanes extracts were distilled off  $\text{P}_2\text{O}_5$  to yield the title compound  $\text{ClCD}_2\text{Si}(\text{CH}_3)_3$  as a colorless liquid in a hexanes solution 20% yield, based on  $d_2$ -chloriodomethane; determined by integration against internal HMB standard.

$^1\text{H}$  NMR (700 MHz,  $\text{C}_6\text{D}_6$ )  $\delta$  -0.04 (s, 9H).  $^2\text{H}$  NMR (92 MHz,  $\text{C}_6\text{D}_6$ )  $\delta$  2.37 (s, 2H).

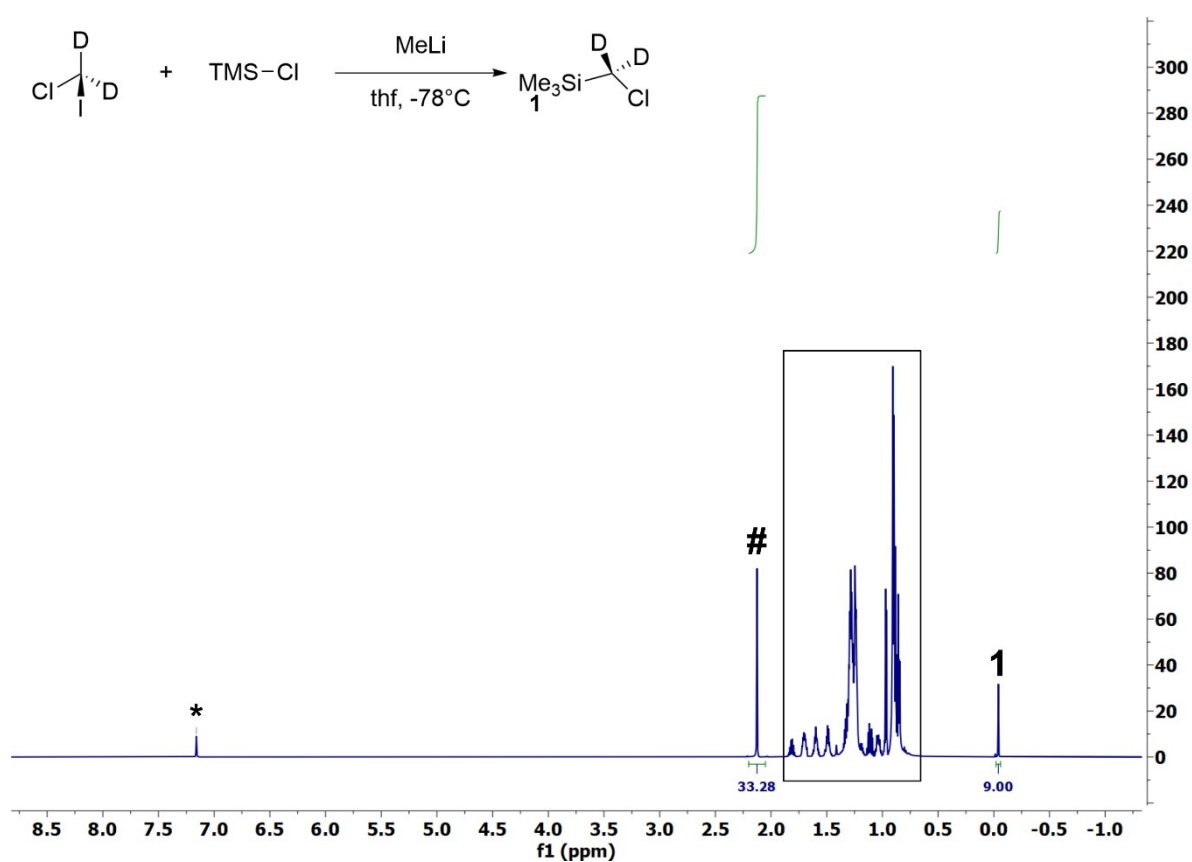

**Figure S 1**  $^1\text{H}$  NMR spectrum (700 MHz) of  $\text{ClCD}_2\text{Si}(\text{CH}_3)_3$  in  $d_6$ -benzene. The solvent residual resonance is marked with an asterisk, # shows the hexamethyl benzene (HMB) internal standard, hexanes from the extraction step, boxed for clarity.

ELTA236\_hex\_extract\_7th\_2H.3.fid  
1H starting parameters - HC 06/17/2019  
No decoupling

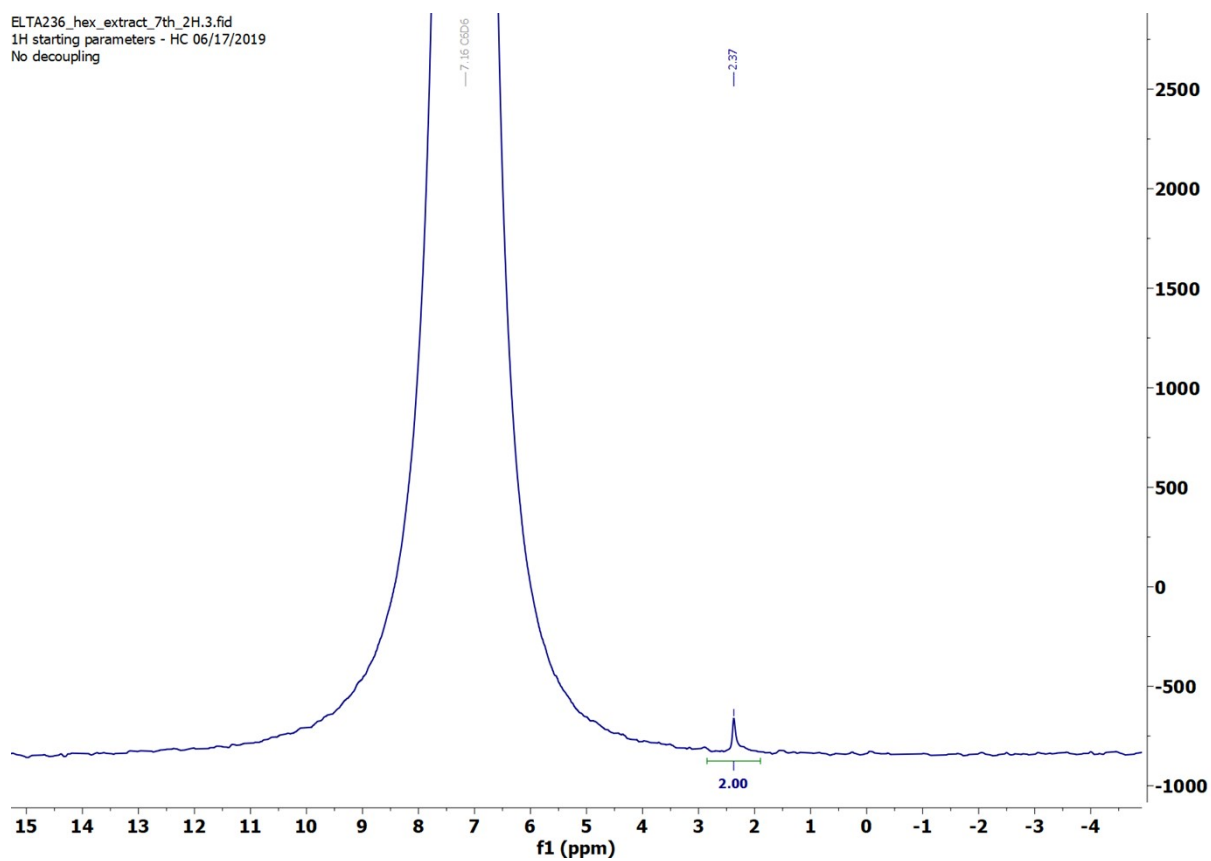

**Figure S 2**  $^2\text{H}$  NMR (92 MHz,  $\text{C}_6\text{D}_6$ ) of  $\text{ClCD}_2\text{Si}(\text{CH}_3)_3$  in  $d_6$ -benzene.

## 2.2. Synthesis of $d_2$ -((trimethylsilyl)methyl)lithium ( $\text{LiCD}_2\text{Si}(\text{CH}_3)_3$ )

In an Ar-filled glovebox, a 20 mL scintillation vial was charged with 17 mL of  $\text{ClCD}_2\text{Si}(\text{CH}_3)_3$  (70.9 mM in hexanes, dried over  $\text{P}_2\text{O}_5$ ) and lithium sand (138 mg, 19.88 mmol). The resulting reaction mixture was stirred at  $60^\circ\text{C}$  overnight and the purple suspension filtered followed by solvent removal under reduced pressure offering the title compound  $\text{LiCD}_2\text{Si}(\text{CH}_3)_3$  as a white crystalline solid. Yield: 85%, 100 mg based on  $\text{ClCD}_2\text{Si}(\text{CH}_3)_3$ .

$^1\text{H}$  NMR (400 MHz,  $\text{C}_6\text{D}_6$ )  $\delta$  0.13 (s, 9H).  $^7\text{Li}$  NMR (156 MHz,  $\text{C}_6\text{D}_6$ )  $\delta$  2.63.

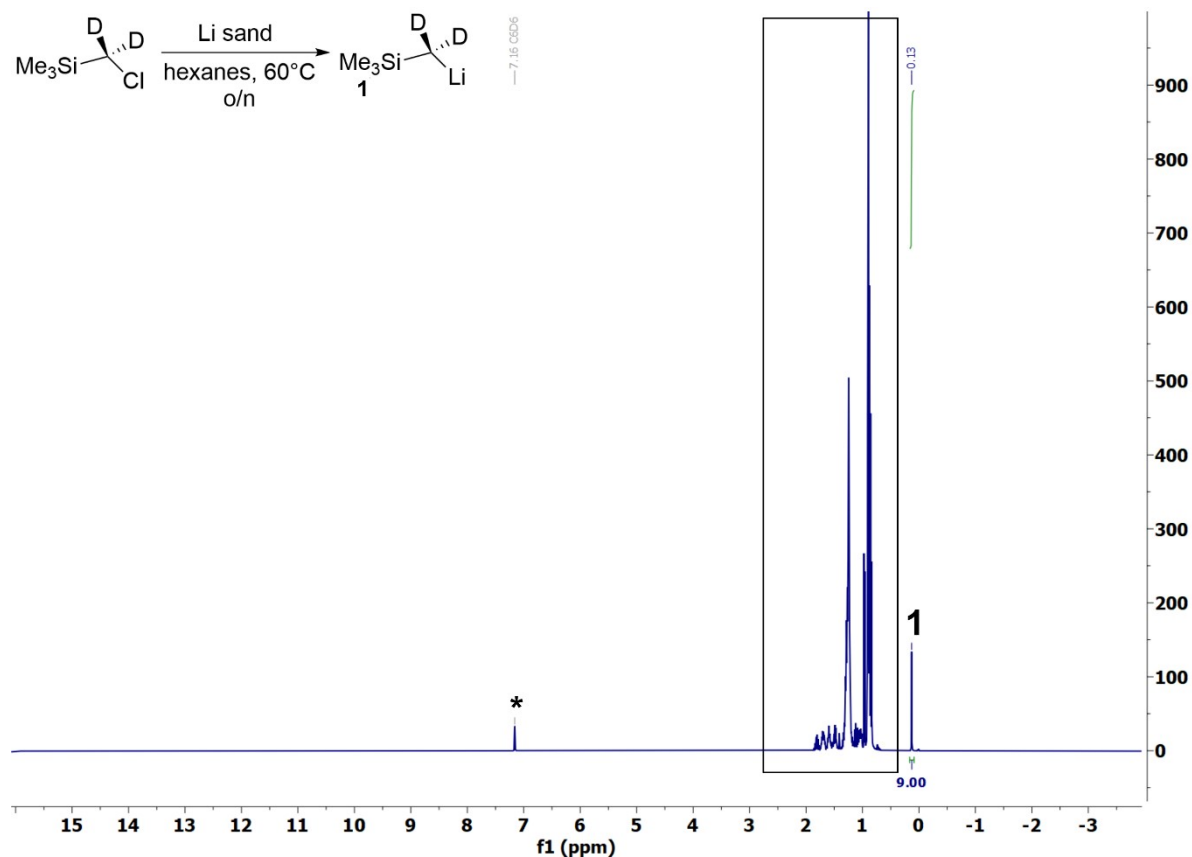

**Figure S 3**  $^1\text{H}$  NMR spectrum (400 MHz) of  $\text{LiCD}_2\text{Si}(\text{CH}_3)_3$  in  $d_6$ -benzene. The solvent residual resonance is marked with an asterisk, hexanes from the extraction step, boxed for clarity. o/n = overnight.

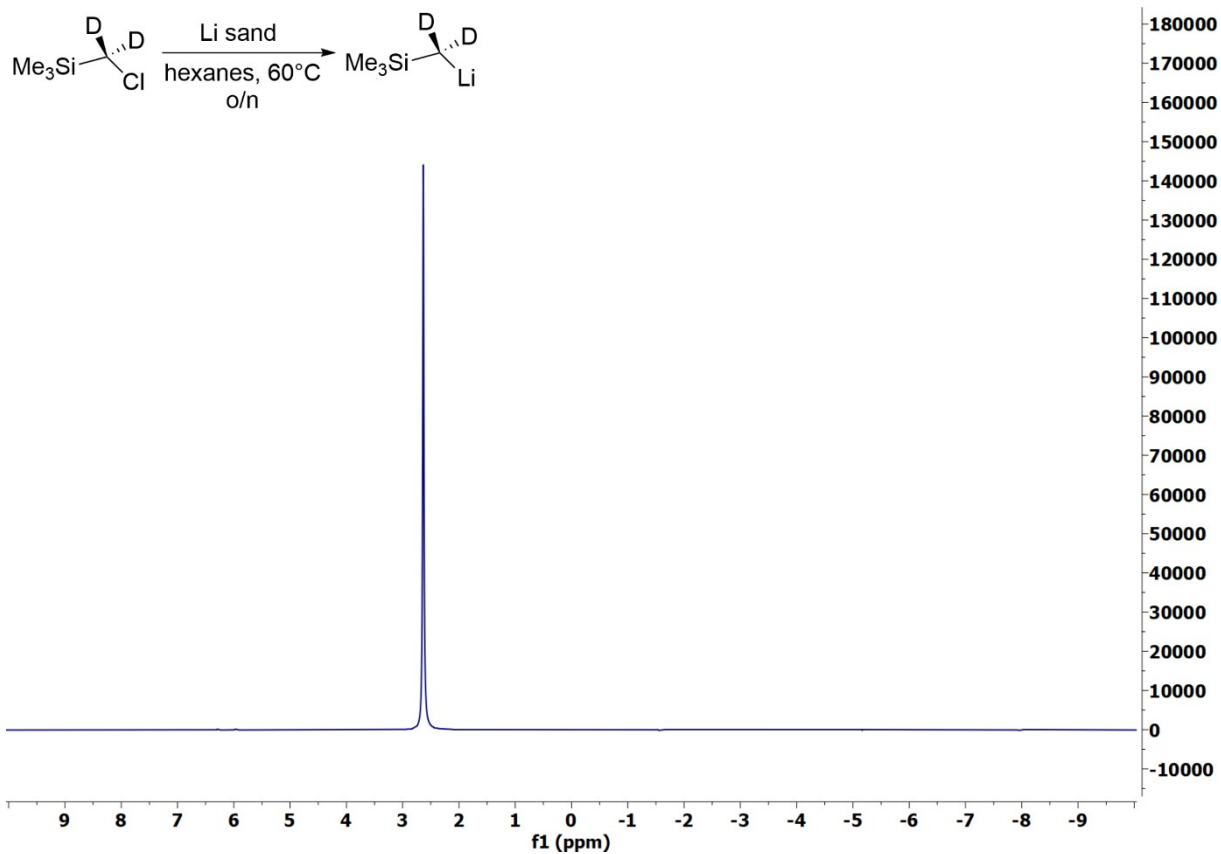

**Figure S 4**  ${}^7\text{Li}$  NMR spectrum (156 MHz) of  $\text{LiCD}_2\text{Si}(\text{CH}_3)_3$  in  $\text{d}_6$ -benzene. o/n = overnight.



### 2.3. Sm(CH<sub>2</sub>SiMe<sub>3</sub>)<sub>3</sub>(C<sub>6</sub>H<sub>14</sub>O<sub>3</sub>) (Sm-G<sub>2</sub>)

<sup>1</sup>H NMR (600 MHz, C<sub>6</sub>D<sub>6</sub>) δ 5.46 (s, 6H), 5.29 (s, 6H), 0.44 (s, 27H), -0.14 (s, 4H), -1.53 (s, 4H). <sup>13</sup>C NMR (151 MHz, C<sub>6</sub>D<sub>6</sub>) δ 131.79, 31.97, 23.05, 14.34, 2.84.

Anal. Calcd for SmC<sub>18</sub>H<sub>47</sub>Si<sub>3</sub>O<sub>3</sub>: C, 39.58, H, 8.67. Found: C, 39.29; H, 8.30.

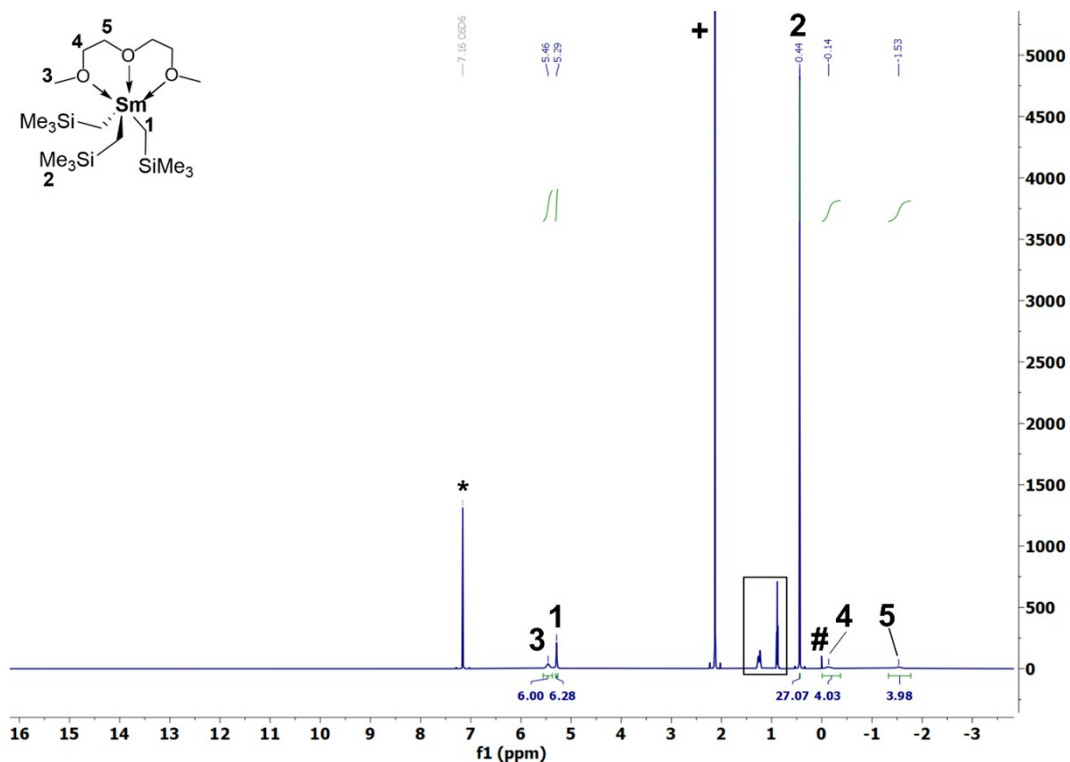

**Figure S 5** <sup>1</sup>H NMR spectrum (600 MHz) of **Sm-G<sub>2</sub>** in *d*<sub>6</sub>-benzene. The solvent residual resonance is marked with an asterisk, # shows TMS arising from the onset of decomposition, + shows the hexamethyl benzene (HMB) internal standard, hexanes from the recrystallization, boxed for clarity.

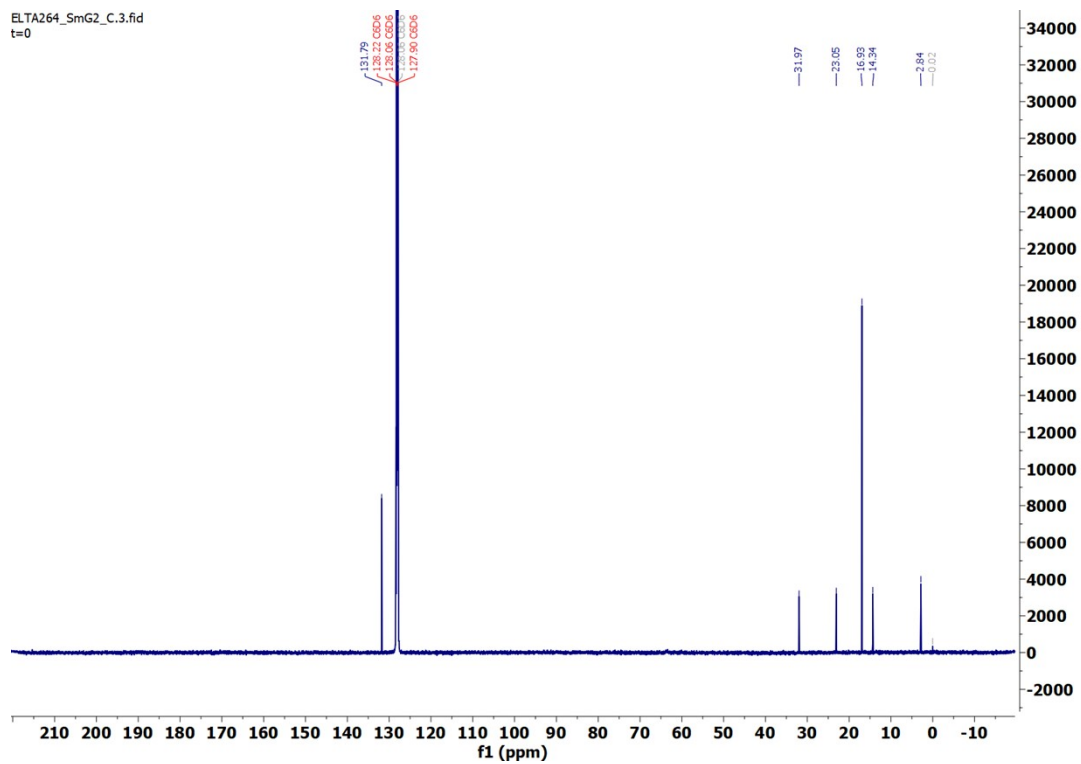

Figure S 6  $^{13}\text{C}\{^1\text{H}\}$  NMR spectrum (151 MHz) of **Sm-G<sub>2</sub>** in  $d_6$ -benzene.

## 2.4. $Y(CH_2SiMe_3)_3(C_6H_{14}O_3)(Y-G_2)$

$^1H$  NMR (600 MHz,  $C_6D_6$ )  $\delta$  3.07 (s, 6H), 2.97 (s, 4H), 2.68 (s, 4H), 0.44 (s, 27H), -0.42 (d,  $J = 2.9$  Hz, 6H).  $^{13}C$  NMR (151 MHz,  $C_6D_6$ )  $\delta$  69.18, 67.97, 60.68, 35.42 (d,  $J = 36.5$  Hz), 4.78.

Anal. Calcd for  $YC_{18}H_{47}Si_3O_3$ : C, 44.60, H, 9.77. Found: C, 42.37; H, 9.16.

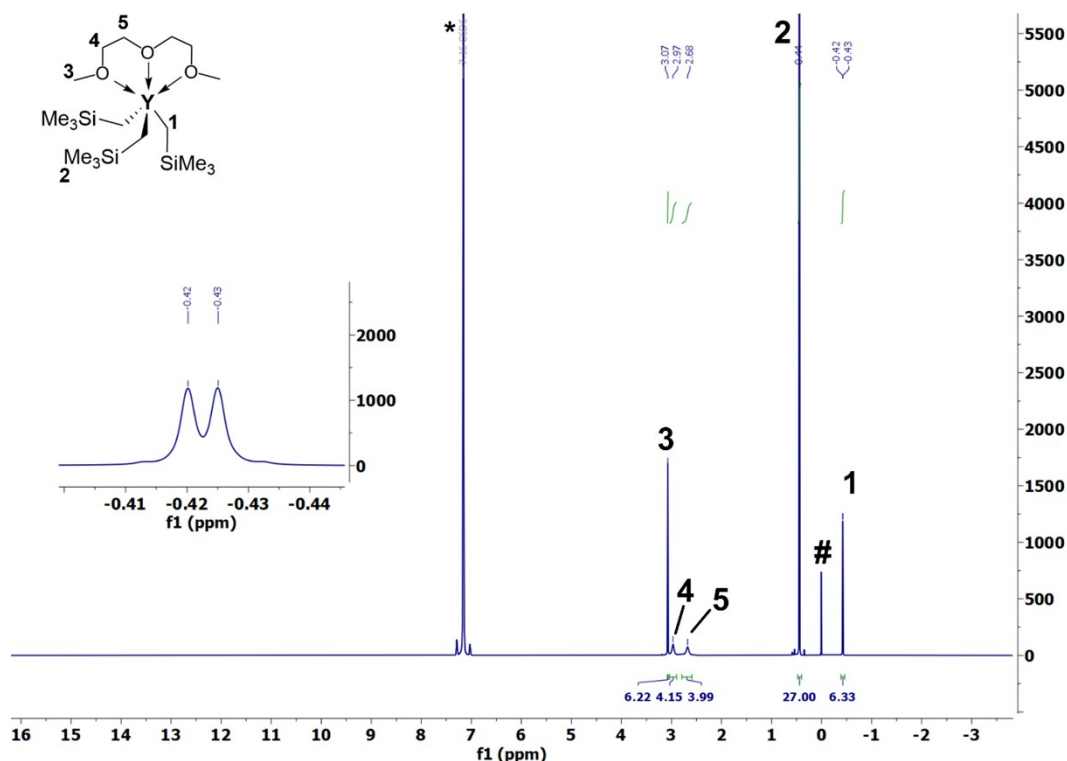

**Figure S 7**  $^1H$  NMR spectrum (600 MHz) of  $Y-G_2$  in  $d_6$ -benzene. The solvent residual resonance is marked with an asterisk, # shows TMS arising from the onset of decomposition.  $CH_2$ -doublet arising from  $^2J_{YH}$  coupling highlighted in inset.

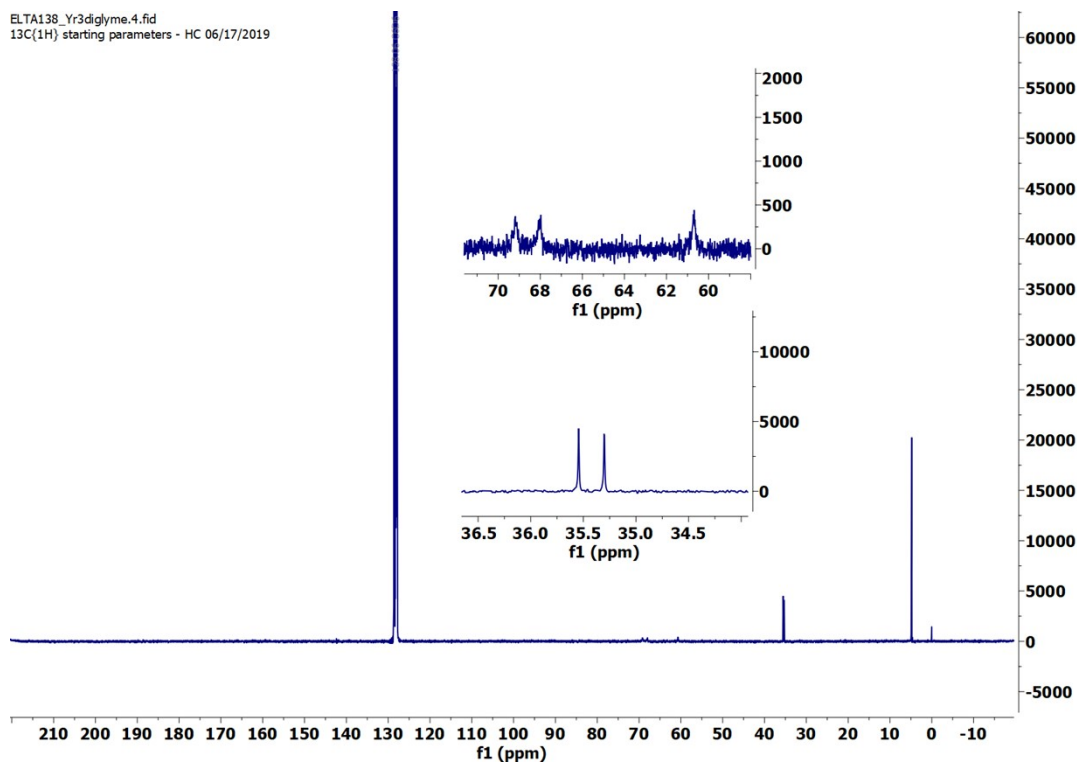

**Figure S 8**  $^{13}C\{^1H\}$  NMR spectrum (151 MHz) of  $Y-G_2$  in  $d_6$ -benzene.

## 2.5. $\text{Lu}(\text{CH}_2\text{SiMe}_3)_3(\text{C}_6\text{H}_{14}\text{O}_3)$ (**Lu-G<sub>2</sub>**)

$^1\text{H}$  NMR (600 MHz,  $\text{C}_6\text{D}_6$ )  $\delta$  3.04 (s, 6H), 2.96 (t,  $J = 5.3$  Hz, 4H), 2.61 (t,  $J = 5.3$  Hz, 4H), 0.44 (s, 27H), -0.66 (s, 6H).  $^{13}\text{C}$  NMR (151 MHz,  $\text{C}_6\text{D}_6$ )  $\delta$  69.41, 68.43, 60.70, 41.60, 4.91.

Anal. Calcd for  $\text{LuC}_{18}\text{H}_{47}\text{Si}_3\text{O}_3$ : C, 37.88, H, 8.30. Found: C, 37.54; H, 8.13.

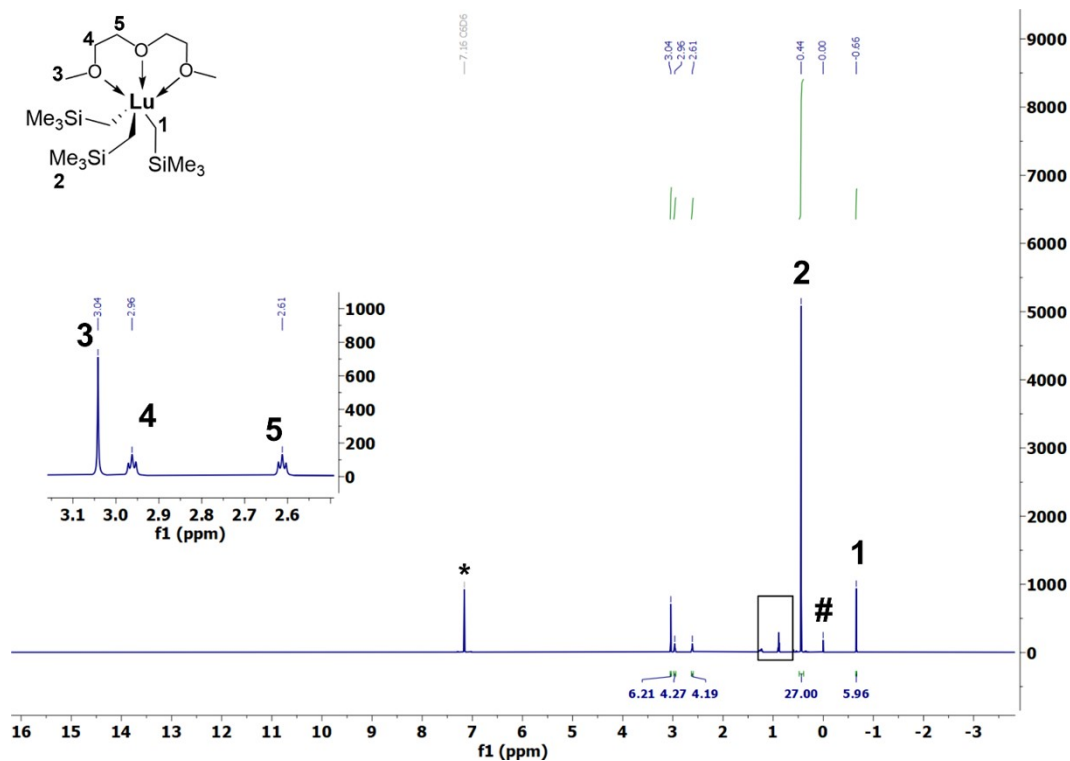

**Figure S 9**  $^1\text{H}$  NMR spectrum (600 MHz) of **Lu-G<sub>2</sub>** in  $d_6$ -benzene. The solvent residual resonance is marked with an asterisk, # shows TMS arising from the onset of decomposition, hexanes from the recrystallization, boxed for clarity.

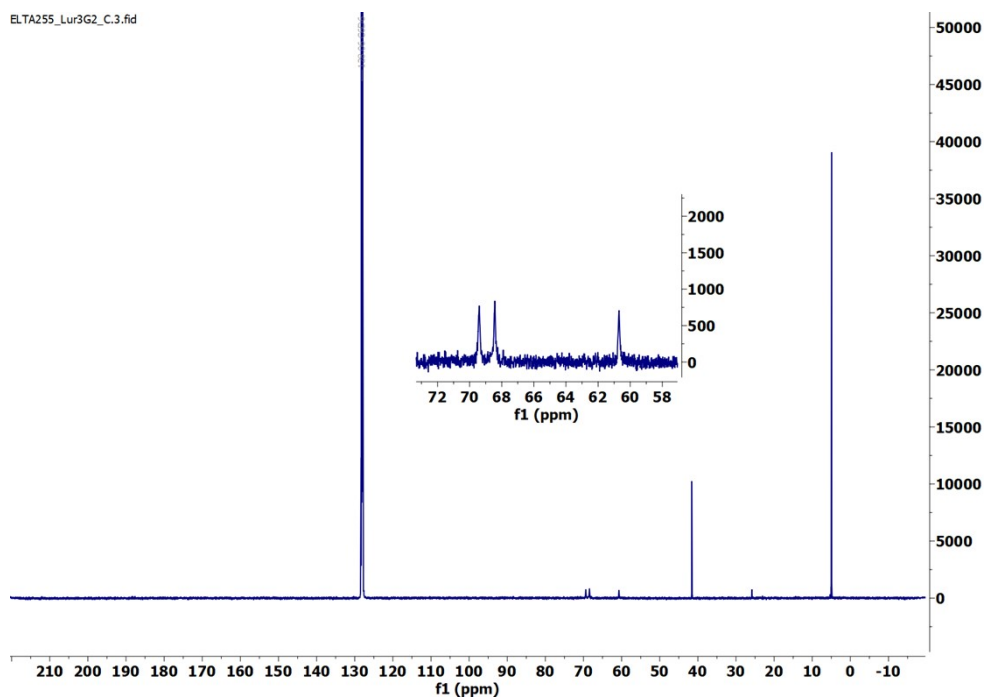

**Figure S 10**  $^{13}\text{C}\{^1\text{H}\}$  NMR spectrum (151 MHz) of **Lu-G<sub>2</sub>** in  $d_6$ -benzene.

## 2.6. $\text{Sc}(\text{CH}_2\text{SiMe}_3)_3(\text{C}_6\text{H}_{14}\text{O}_3)$ (**Sc-G<sub>2</sub>**)

$^1\text{H}$  NMR (600 MHz,  $\text{C}_6\text{D}_6$ )  $\delta$  3.23 (t,  $J = 5.2$  Hz, 3H), 3.02 (s, 6H), 2.76 (t,  $J = 5.3$  Hz, 5H), 0.41 (s, 36H), 0.09 (s, 6H).  $^{13}\text{C}$  NMR (151 MHz,  $\text{C}_6\text{D}_6$ )  $\delta$  70.05, 69.71, 60.73, 4.33.

Anal. Calcd for  $\text{ScC}_{18}\text{H}_{47}\text{Si}_3\text{O}_3$ : C, 49.05, H, 10.75. Found: C, 48.97; H, 10.66.

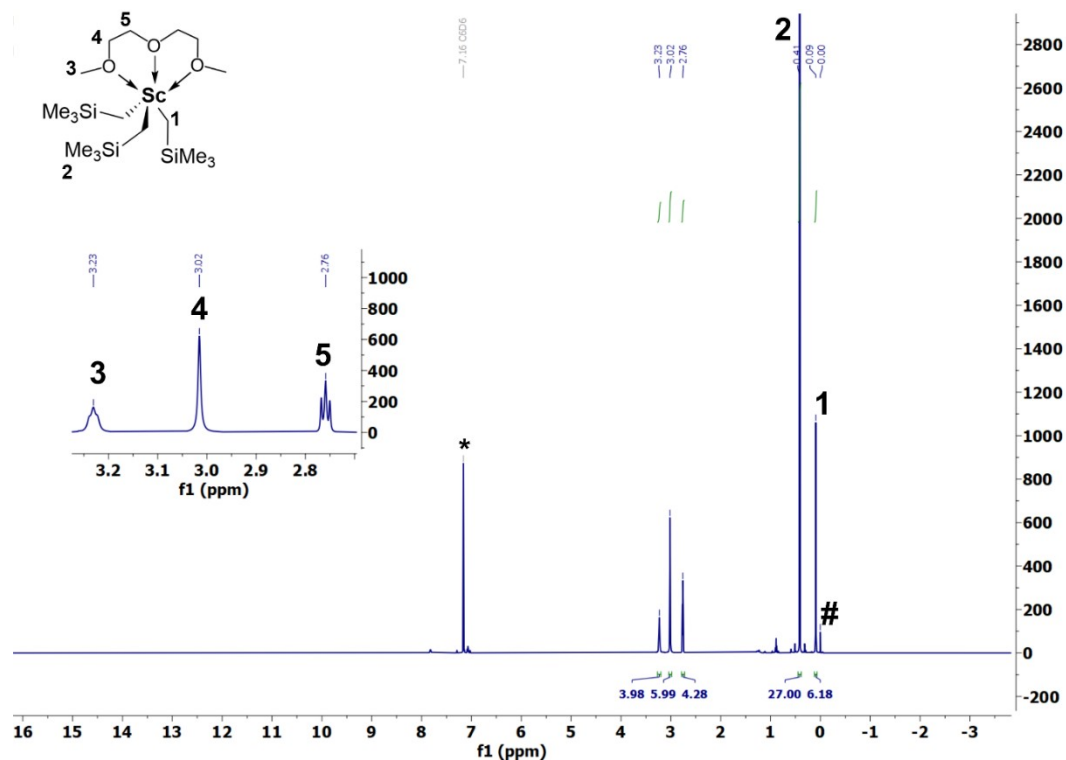

**Figure S 11**  $^1\text{H}$  NMR spectrum (600 MHz) of **Sc-G<sub>2</sub>** in  $d_6$ -benzene. The solvent residual resonance is marked with an asterisk, # shows TMS arising from the onset of decomposition.

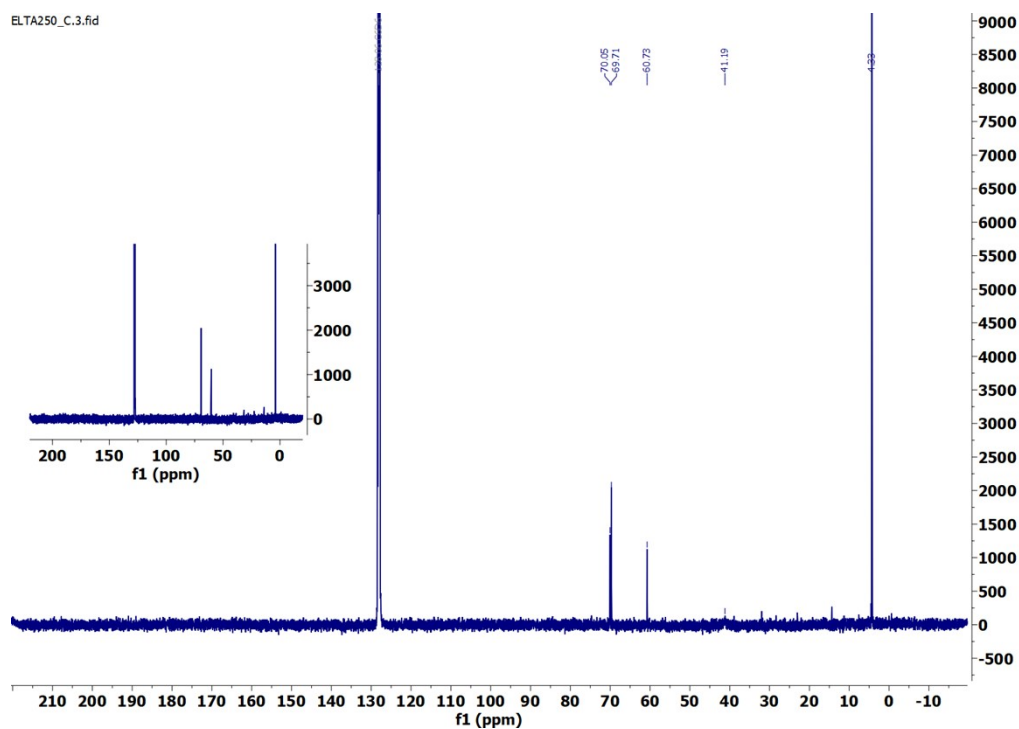

**Figure S 12**  $^{13}\text{C}\{^1\text{H}\}$  NMR spectrum (151 MHz) of **Sc-G<sub>2</sub>** in  $d_6$ -benzene.

## 2.7. $\text{Sm}(\text{CH}_2\text{SiMe}_3)_3(\text{CH}_3(\text{OCH}_2\text{CH}_2)_3\text{O})$ (**Sm-G<sub>3</sub>**)

$^1\text{H}$  NMR (600 MHz,  $\text{C}_6\text{D}_6$ )  $\delta$  10.25 (s, 1H), 6.00 (s, 1H), 1.39 (s, 6H), -1.80 (s, 1H), -3.79 (s, 1H).  $^{13}\text{C}$  NMR (151 MHz,  $\text{C}_6\text{D}_6$ )  $\delta$  152.17, 86.66, 72.19, 70.77, 69.74, 67.62, 58.73, 3.61.

Anal. Calcd for  $\text{SmC}_{20}\text{H}_{51}\text{Si}_3\text{O}_4$ : C, 40.7, H, 8.71. Found: C, 40.32; H, 8.43.

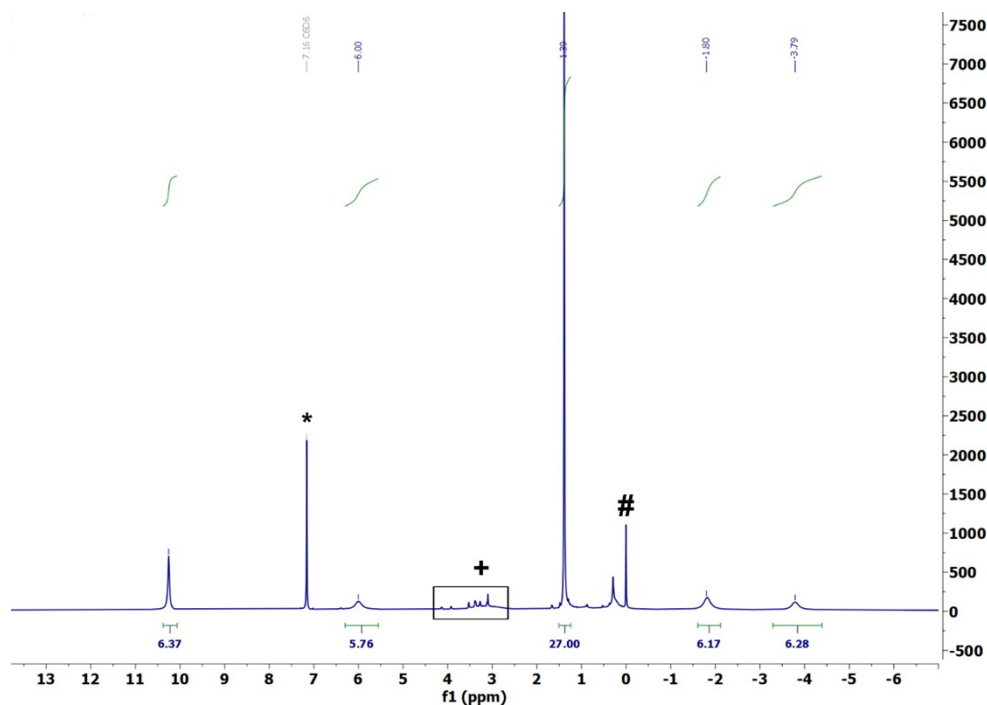

**Figure S 13**  $^1\text{H}$  NMR spectrum (600 MHz) of **Sm-G<sub>3</sub>** in  $d_6$ -benzene. The solvent residual resonance is marked with an asterisk, # shows TMS arising from the onset of decomposition, + for decomposition products resulting from  $\text{G}_3$  decomposition.

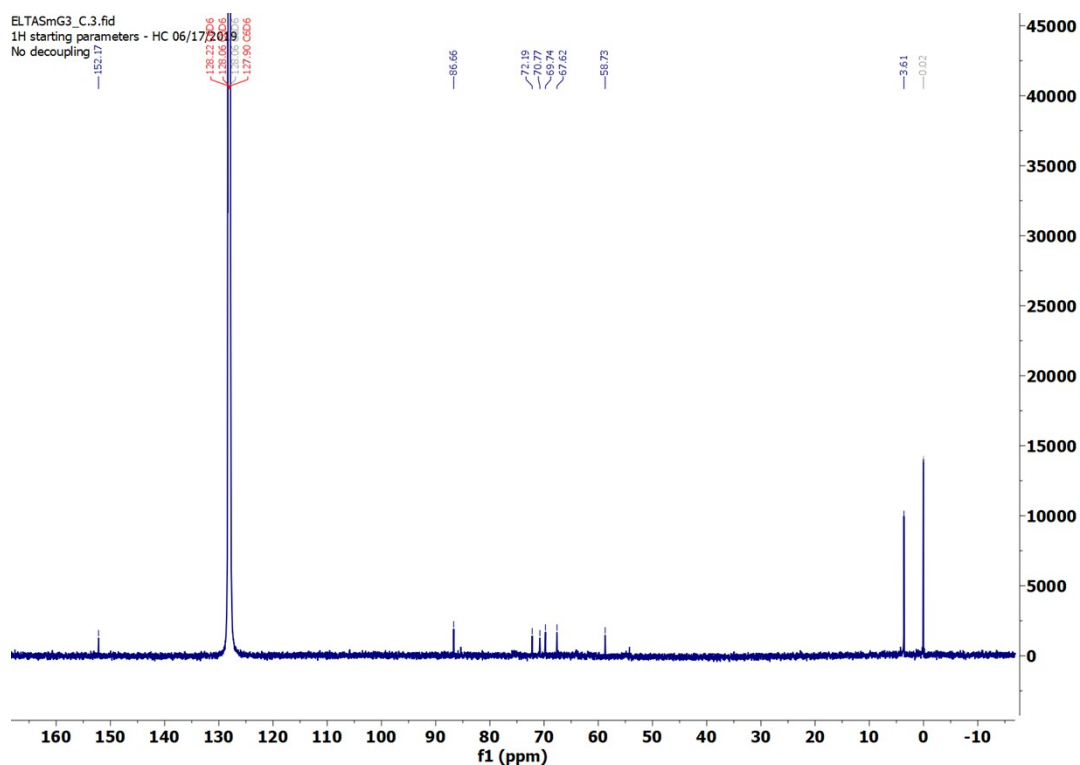

**Figure S 14**  $^{13}\text{C}\{^1\text{H}\}$  NMR spectrum (151 MHz) of **Sm-G<sub>3</sub>** in  $d_6$ -benzene.

**2.8.  $\text{Y}(\text{CH}_2\text{SiMe}_3)_3((\text{OCH}_2\text{CH}_2)_3\text{O})$  (**Y-G<sub>3</sub>**)**

$^1\text{H}$  NMR (400 MHz,  $\text{C}_6\text{D}_6$ )  $\delta$  3.47 (s, 6H), 3.09 (t,  $J = 4.8$  Hz, 4H), 3.03 – 2.93 (m, 8H), 0.39 (s, 27H), -1.00 – -1.15 (m, 6H).  $^{13}\text{C}$  NMR (151 MHz,  $\text{C}_6\text{D}_6$ )  $\delta$  72.32, 71.98, 69.51, 68.37, 5.27, 4.92.

Anal. Calcd for  $\text{YC}_{20}\text{H}_{51}\text{Si}_3\text{O}_4$ : C, 45.43, H, 9.72. Found: C, 45.38; H, 9.76.

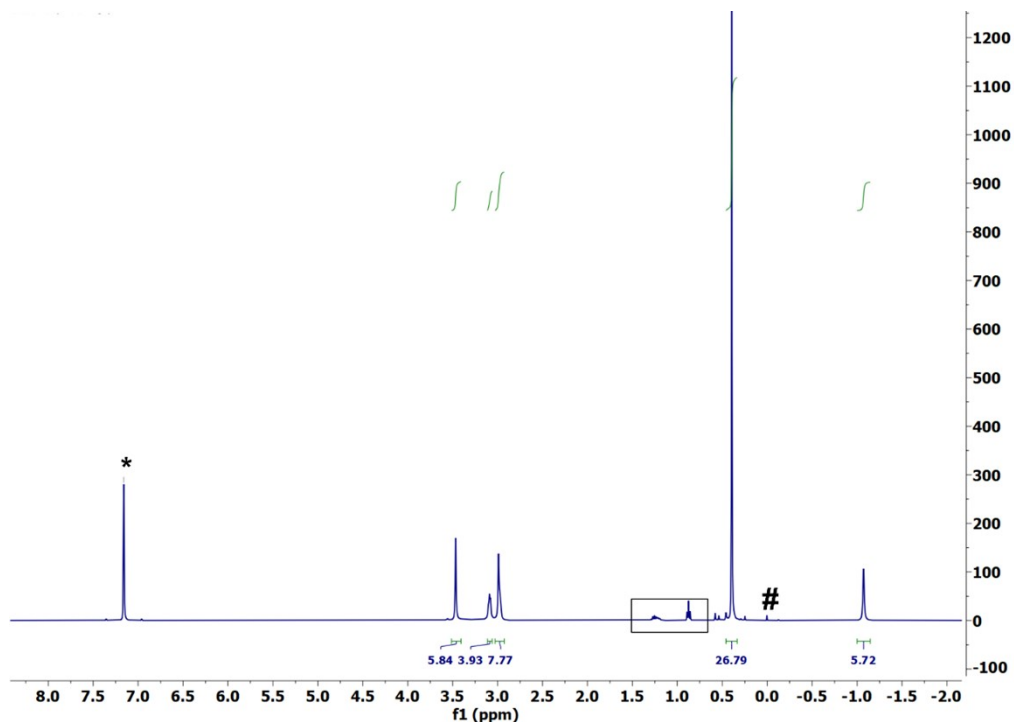

**Figure S 15**  $^1\text{H}$  NMR spectrum (400 MHz) of **Y-G<sub>3</sub>** in  $d_6$ -benzene. The solvent residual resonance is marked with an asterisk, # shows TMS arising from the onset of decomposition, hexanes from recrystallization boxed.

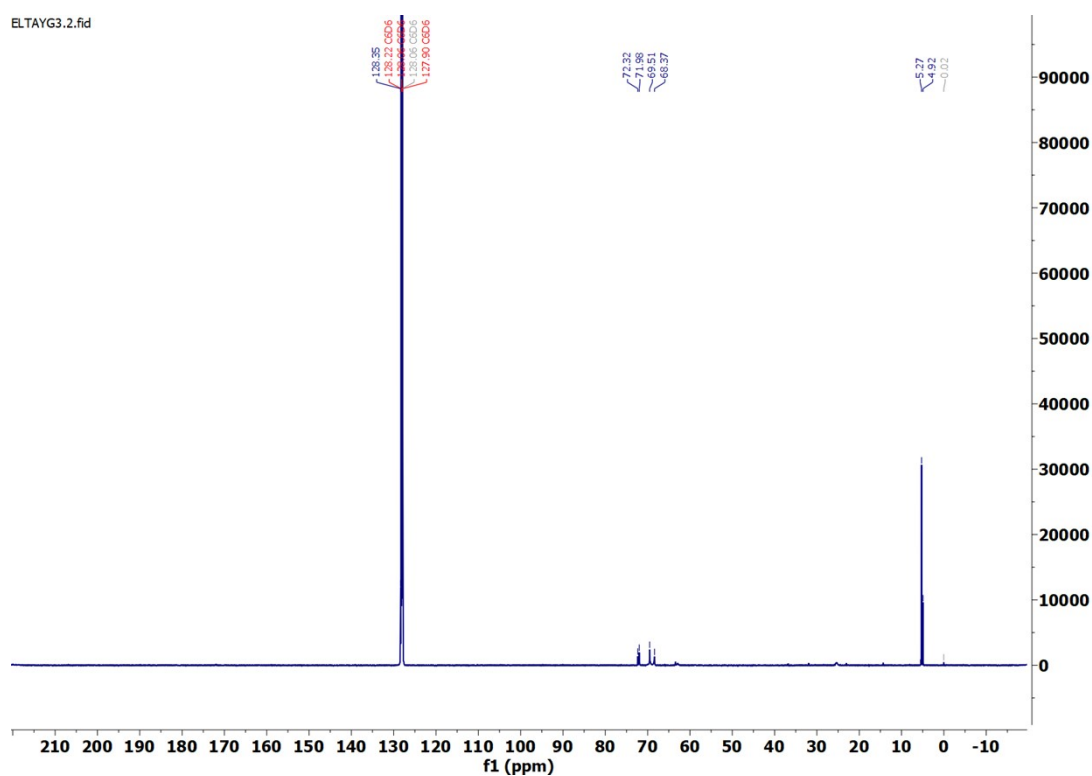

**Figure S 16**  $^{13}\text{C}\{^1\text{H}\}$  NMR spectrum (151 MHz) of **Y-G<sub>3</sub>** in  $d_6$ -benzene.

**2.9.  $\text{Lu}(\text{CH}_2\text{SiMe}_3)_3((\text{OCH}_2\text{CH}_2)_3\text{O})$  (**Lu-G<sub>3</sub>**)**

$^1\text{H}$  NMR (600 MHz,  $\text{C}_6\text{D}_6$ )  $\delta$  3.23 (t,  $J = 4.9$  Hz, 4H), 3.13 (d,  $J = 8.5$  Hz, 10H), 2.97 (t,  $J = 5.2$  Hz, 4H), 0.42 (s, 27H), -0.82 (s, 6H).  $^{13}\text{C}$  NMR (151 MHz,  $\text{C}_6\text{D}_6$ )  $\delta$  71.53, 69.69, 69.26, 60.51, 38.44, 34.45, 22.73, 14.27, 5.06.

Anal. Calcd for  $\text{LuC}_{20}\text{H}_{51}\text{Si}_3\text{O}_4$ : C, 39.07, H, 8.36. Found: C, 38.69; H, 8.11.

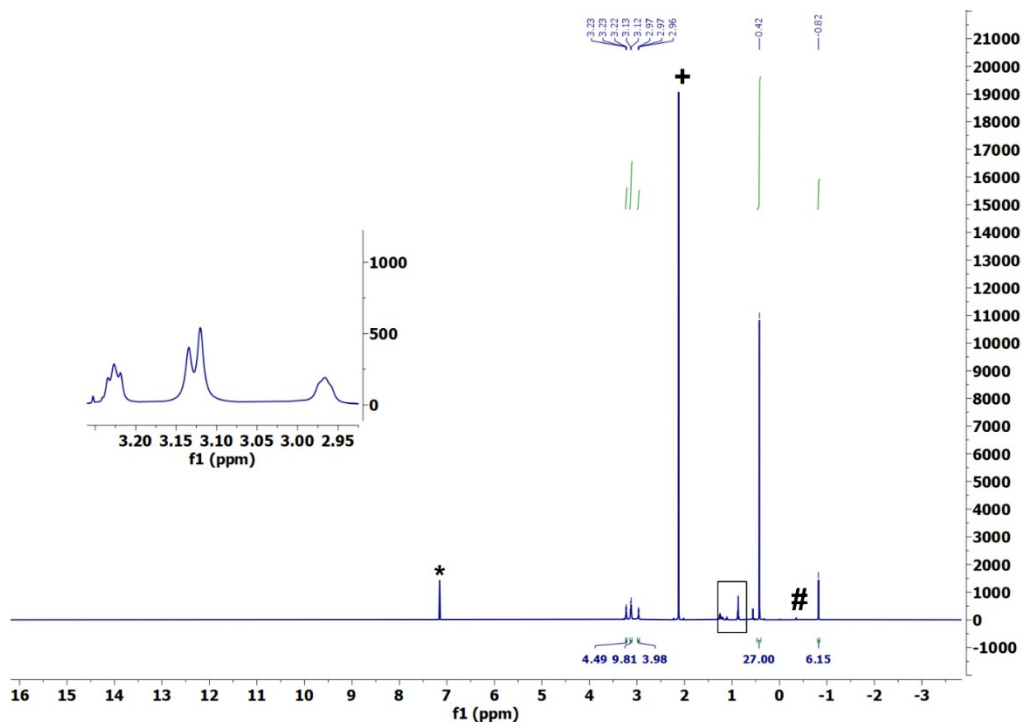

**Figure S 17**  $^1\text{H}$  NMR spectrum (600 MHz) of **Lu-G<sub>3</sub>** in  $d_6$ -benzene. The solvent residual resonance is marked with an asterisk, # shows TMS arising from the onset of decomposition, + shows the hexamethyl benzene (HMB) internal standard, hexanes from the recrystallization, boxed for clarity.

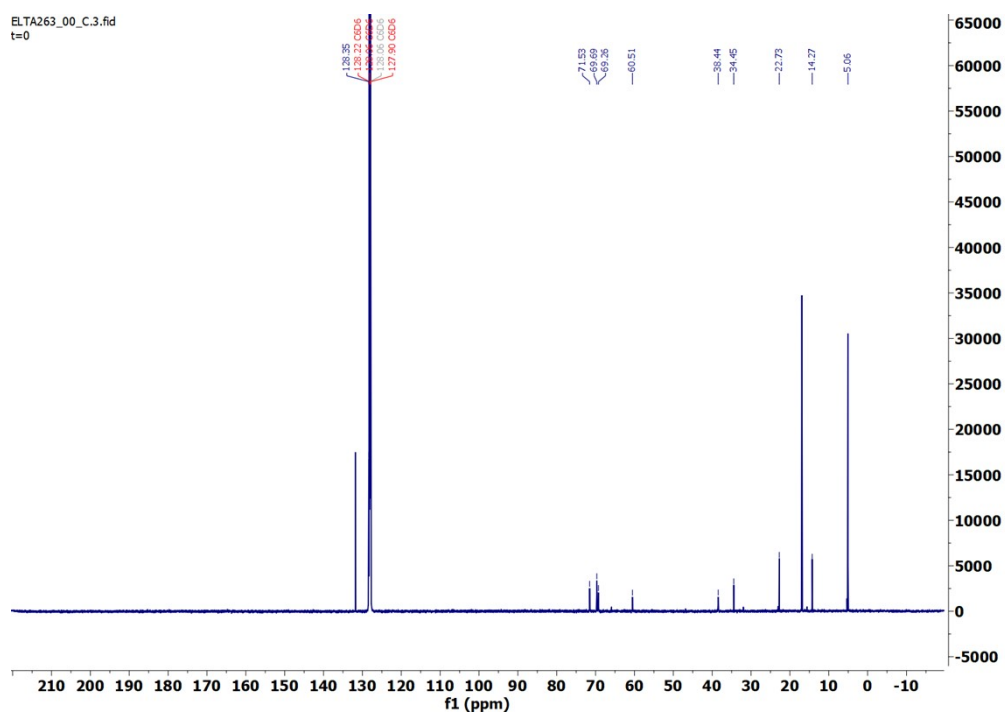



**Figure S 18**  $^{13}\text{C}\{^1\text{H}\}$  NMR spectrum (151 MHz) of **Lu-G<sub>3</sub>** in  $d_6$ -benzene.

## 2.10. $\text{Sm}(\text{CH}_2\text{SiMe}_3)_3(\text{Me}_2\text{NCH}_2\text{CH}_2\text{NMe}_2)$ (**Sm-TMEDA**)

$^1\text{H}$  NMR (600 MHz,  $\text{C}_6\text{D}_6$ )  $\delta$  4.50 (s, 6H), 2.10 (s, 12H), 0.21 (s, 27H), -2.68 (s, 4H).  $^{13}\text{C}$  NMR (151 MHz,  $\text{C}_6\text{D}_6$ )  $\delta$  58.45, 46.03.

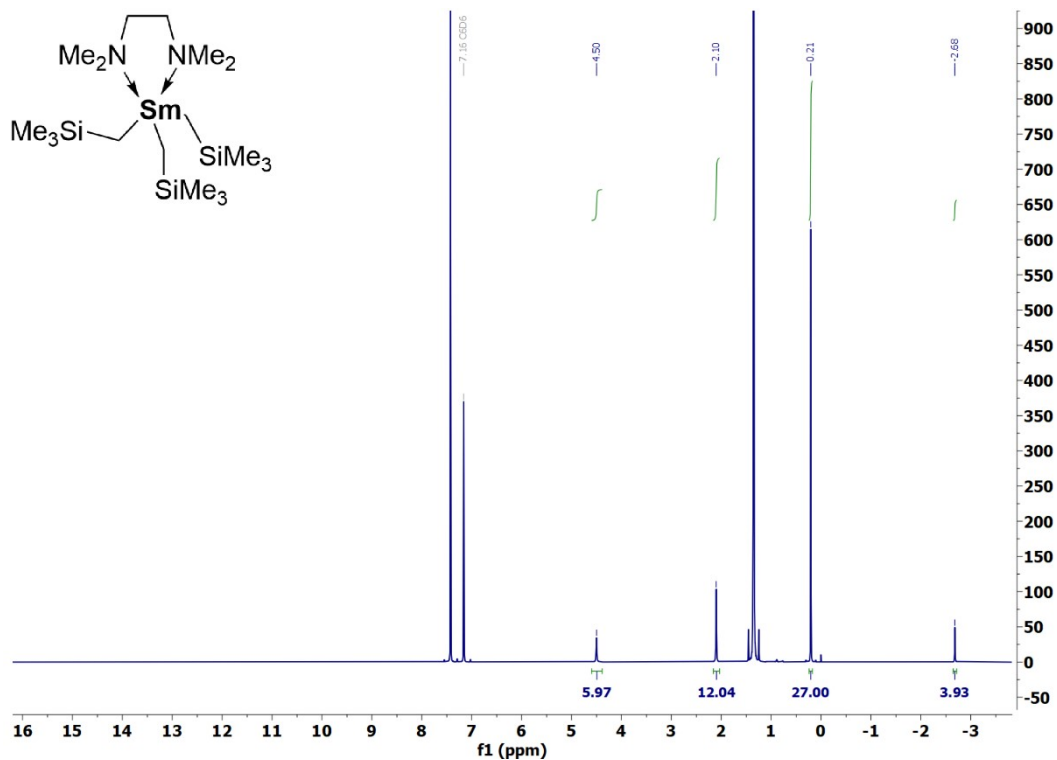

Figure S 19  $^1\text{H}$  NMR spectrum (600 MHz) of **Sm-TMEDA** in  $d_6$ -benzene.

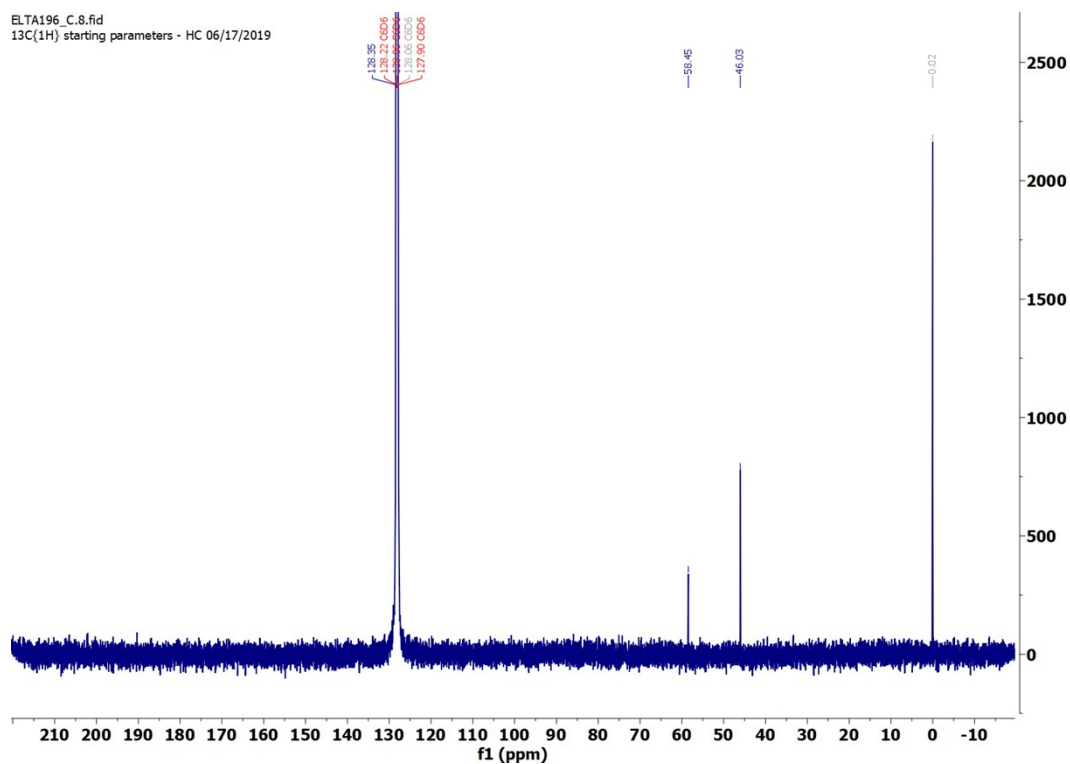

Figure S 20  $^{13}\text{C}\{^1\text{H}\}$  NMR spectrum (151 MHz) of **Sm-TMEDA** in  $d_6$ -benzene

### 2.11. $\text{Lu}(\text{CH}_2\text{SiMe}_3)_3(\text{Me}_2\text{NCH}_2\text{CH}_2\text{NMe}_2)$ (**Lu-TMEDA**)

$^1\text{H}$  NMR (600 MHz,  $\text{C}_6\text{D}_6$ )  $\delta$  1.82 (s, 12H), 1.48 (s, 4H), 0.41 (s, 27H), -0.61 (s, 6H).  $^{13}\text{C}$  NMR (151 MHz,  $\text{C}_6\text{D}_6$ )  $\delta$  56.60, 46.23, 45.51, 4.87.

Anal. Calcd for  $\text{LuC}_{18}\text{H}_{49}\text{Si}_3\text{N}_2$ : C, 39.11, H, 8.93; N, 5.07. Found: C, 39.11; H, 8.97; N, 4.99.

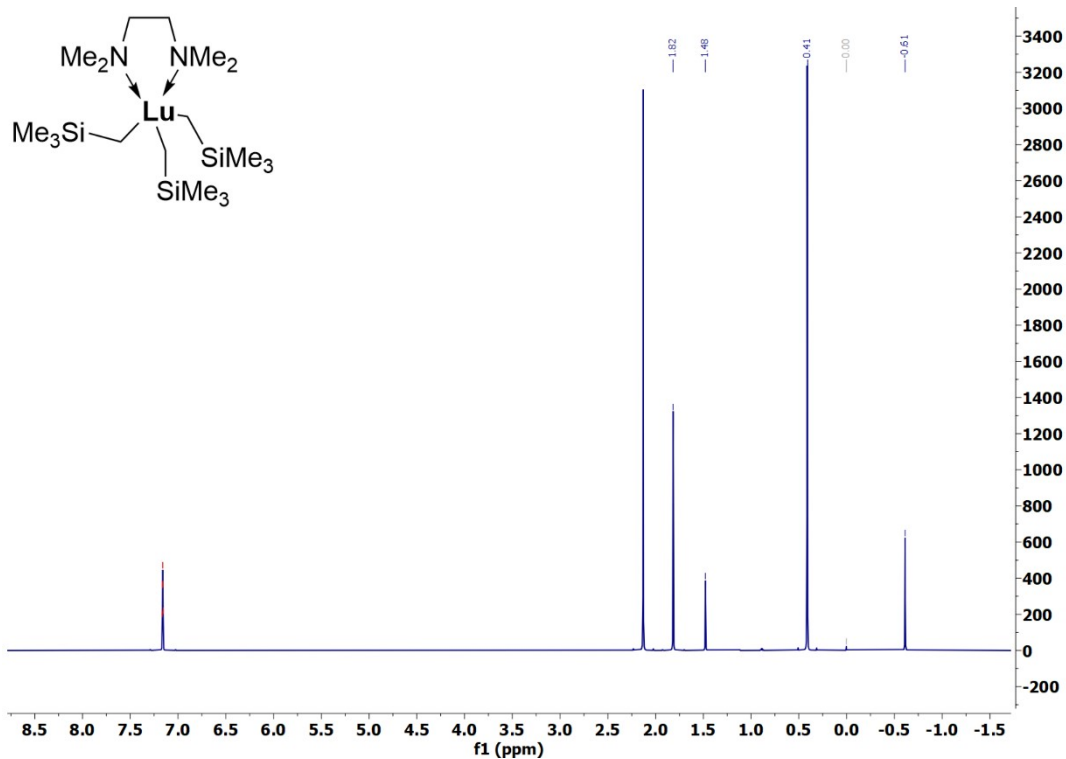

Figure S 21  $^1\text{H}$  NMR spectrum (600 MHz) of **Lu-TMEDA** in  $d_6$ -benzene.

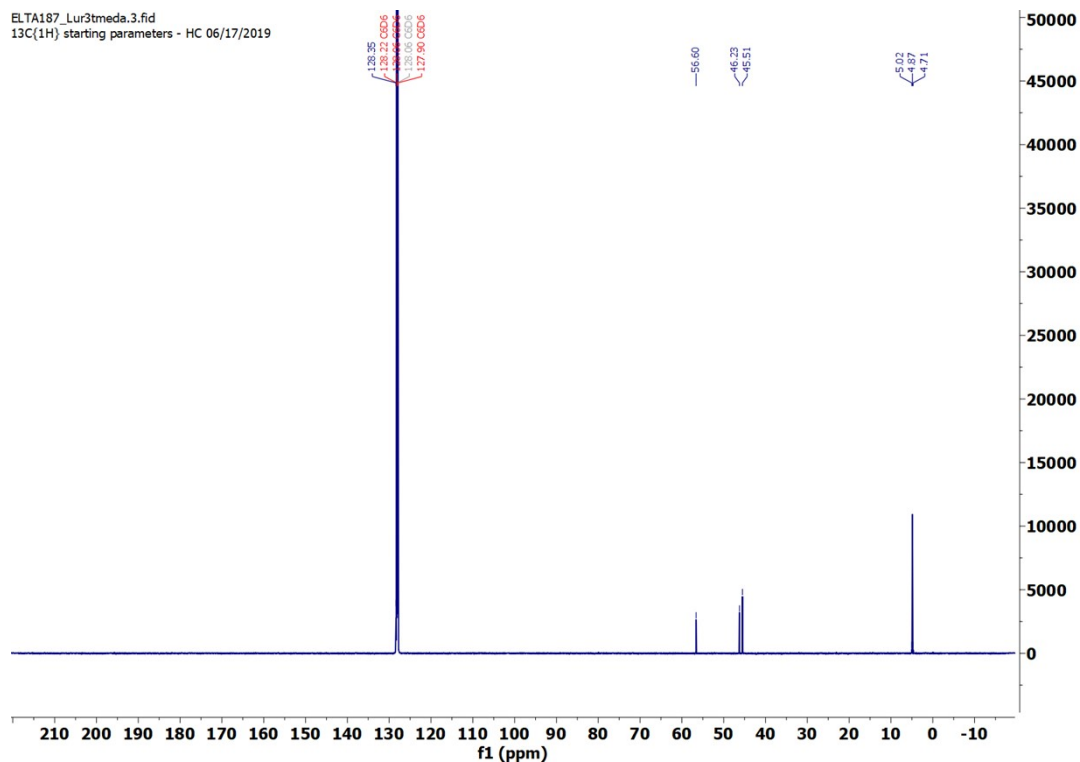

Figure S 22  $^{13}\text{C}\{^1\text{H}\}$  NMR spectrum (151 MHz) of **Lu-TMEDA** in  $d_6$ -benzene

## 2.12. $\text{Sc}(\text{CH}_2\text{SiMe}_3)_3(\text{Me}_2\text{NCH}_2\text{CH}_2\text{NMe}_2)$ (**Sc-TMEDA**)

$^1\text{H}$  NMR (600 MHz,  $\text{C}_6\text{D}_6$ )  $\delta$  1.91 (s, 12H), 1.57 (s, 4H), 0.40 (s, 27H), 0.10 (s, 6H).  $^{13}\text{C}$  NMR (151 MHz,  $\text{C}_6\text{D}_6$ )  $\delta$  56.85, 46.69, 16.93, 4.41.

Anal. Calcd for  $\text{ScC}_{18}\text{H}_{49}\text{Si}_3\text{N}_2$ : C, 51.13, H, 11.68; N, 6.63. Found: C, 50.97; H, 11.59; N, 6.57.

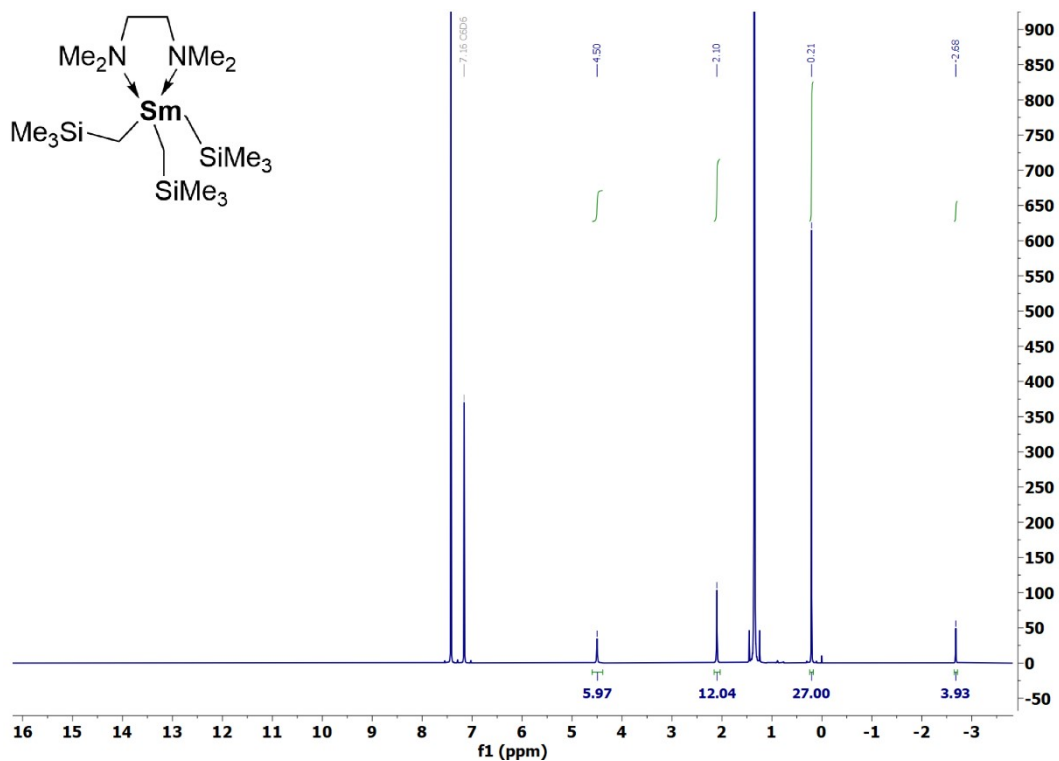

**Figure S 23**  $^1\text{H}$  NMR spectrum (600 MHz) of **Sc-TMEDA** in  $d_6$ -benzene.

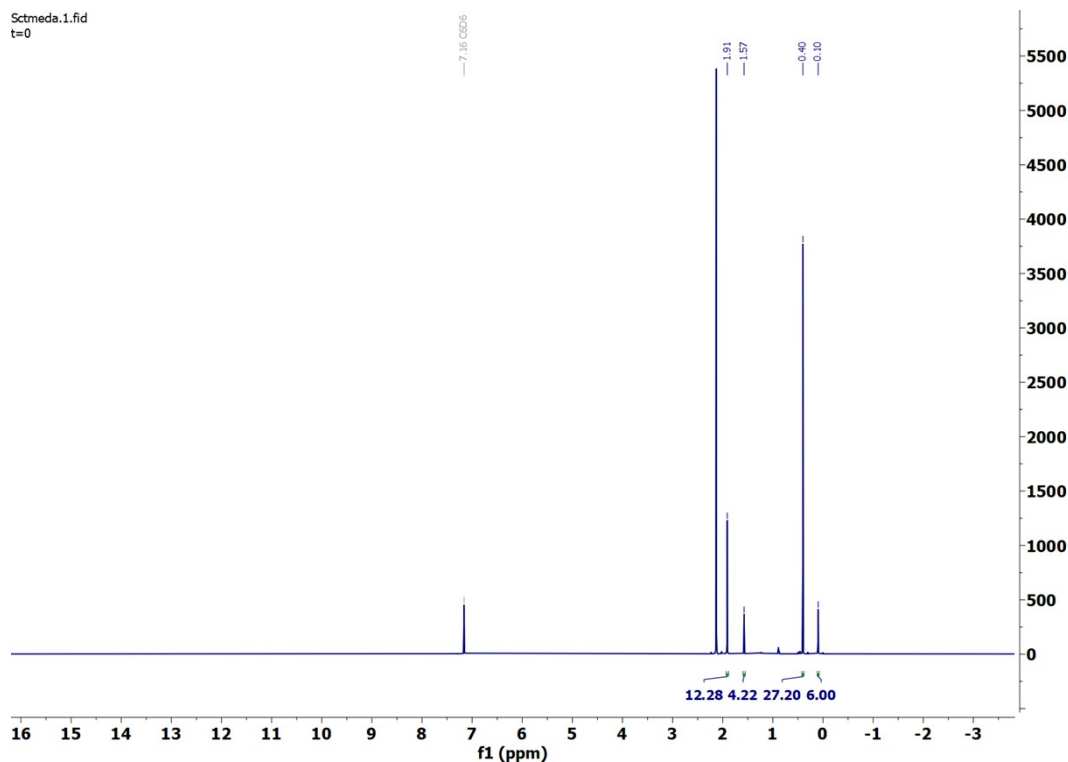

**Figure S 24**  $^{13}\text{C}\{^1\text{H}\}$  NMR spectrum (151 MHz) of **Sc-TMEDA** in  $d_6$ -benzene

### 2.13. Lu(CH<sub>2</sub>SiMe<sub>3</sub>)<sub>3</sub>(C<sub>6</sub>H<sub>16</sub>P<sub>2</sub>)(C<sub>4</sub>H<sub>8</sub>O) (Lu-DMPE)

<sup>1</sup>H NMR (600 MHz, C<sub>6</sub>D<sub>6</sub>) δ 3.91 (s, 4H), 1.36 – 1.28 (m, 4H), 1.12 (t, *J* = 7.0 Hz, 4H), 0.78 (s, 12H), 0.36 (s, 27H), -0.63 (s, 6H). <sup>13</sup>C NMR (151 MHz, C<sub>6</sub>D<sub>6</sub>) δ 25.13, 12.30, 4.77. <sup>31</sup>P NMR (243 MHz, C<sub>6</sub>D<sub>6</sub>) δ -38.88.

Anal. Calcd for LuC<sub>22</sub>H<sub>57</sub>Si<sub>3</sub>P<sub>2</sub>O: C, 40.1; H, 8.72. Found: C, 39.89; H, 8.62.

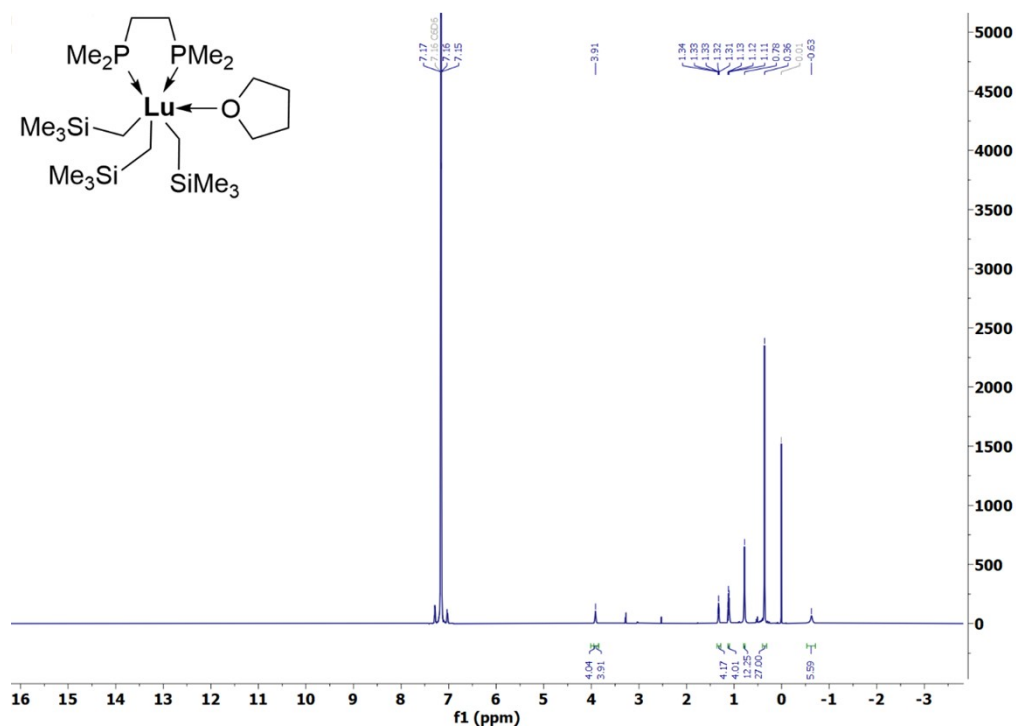

**Figure S 25** <sup>1</sup>H NMR spectrum (600 MHz) of **Lu-DMPE** in *d*<sub>6</sub>-benzene.

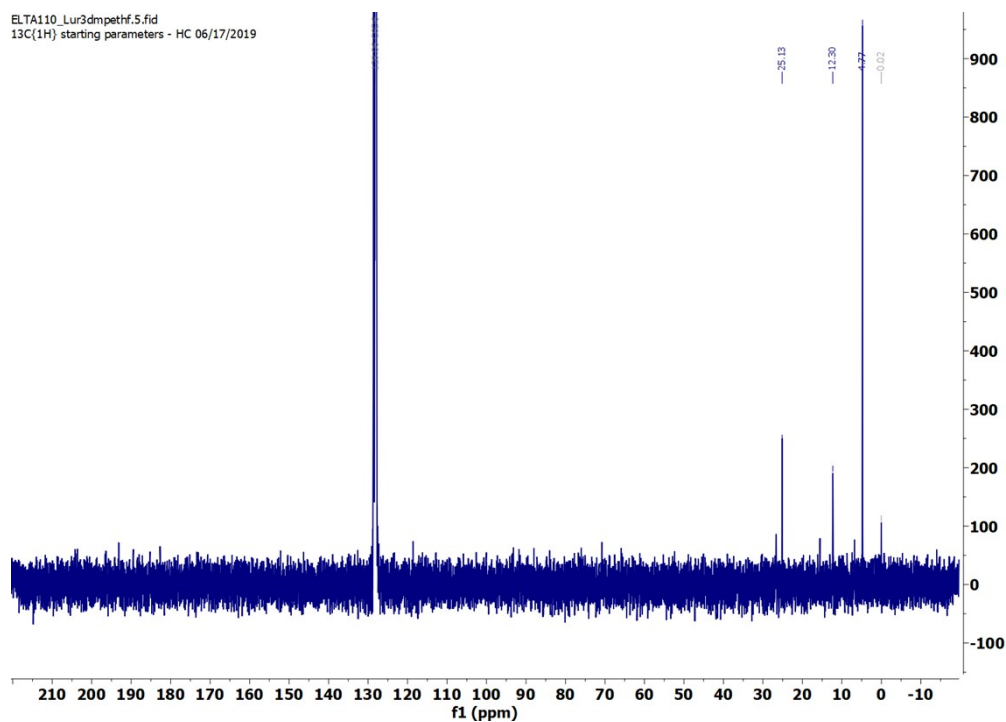

**Figure S 26** <sup>13</sup>C{<sup>1</sup>H} NMR spectrum (151 MHz) of **Lu-DMPE** in *d*<sub>6</sub>-benzene

ELTA110\_Lur3dmpe.5.fid  
31P(1H) starting parameters - HC 06/17/2019

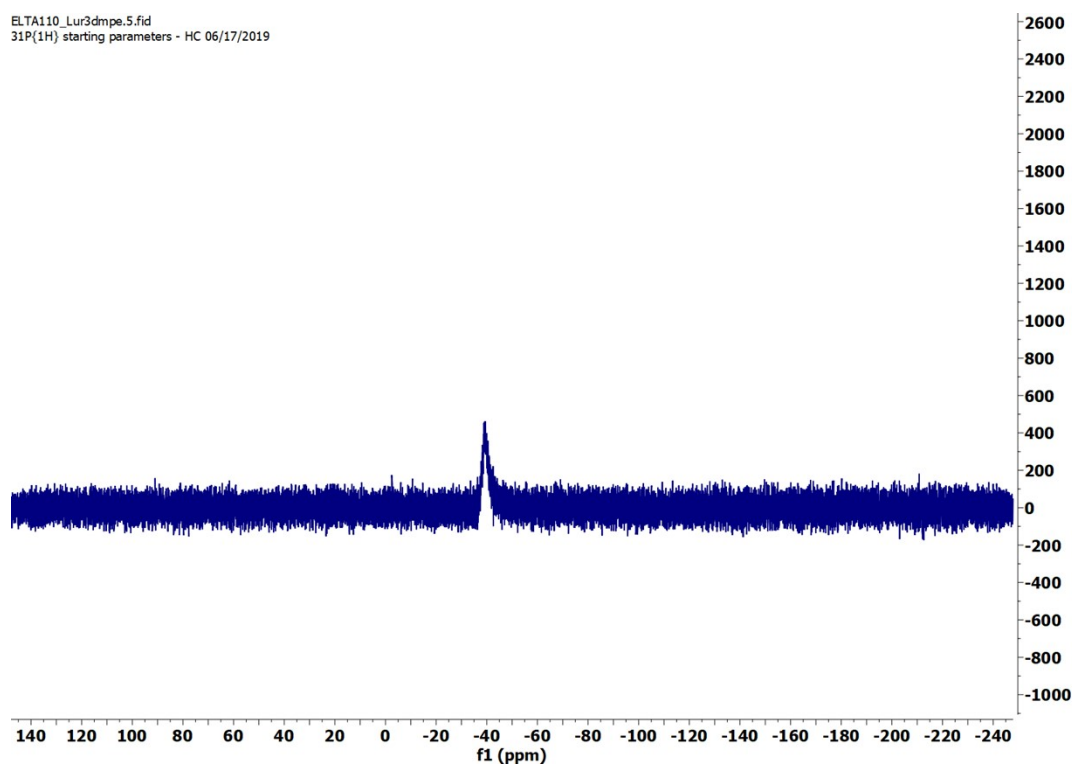

Figure S 27  $^{31}\text{P}$  NMR spectrum (243 MHz,  $\text{C}_6\text{D}_6$ ) of Lu-DMPE in  $d_6$ -benzene.

### 2.14. $\text{Sc}(\text{CH}_2\text{SiMe}_3)_3(\text{C}_6\text{H}_{16}\text{P}_2)$ (**Sc-DMPE**)

$^1\text{H}$  NMR (600 MHz,  $\text{C}_6\text{D}_6$ )  $\delta$  0.92 (s, 4H), 0.76 (t,  $J = 1.6$  Hz, 12H), 0.40 (s, 27H), 0.26 (s, 6H).  $^{13}\text{C}$  NMR (151 MHz,  $\text{C}_6\text{D}_6$ )  $\delta$  28.15, 14.04, 14.01, 13.97, 13.94.  $^{31}\text{P}$  NMR (243 MHz,  $\text{C}_6\text{D}_6$ )  $\delta$  -36.30.

Anal. Calcd for  $\text{ScC}_{18}\text{H}_{49}\text{Si}_3\text{P}_2$ : C, 47.33; H, 10.81. Found: C, 46.95; H, 10.56.

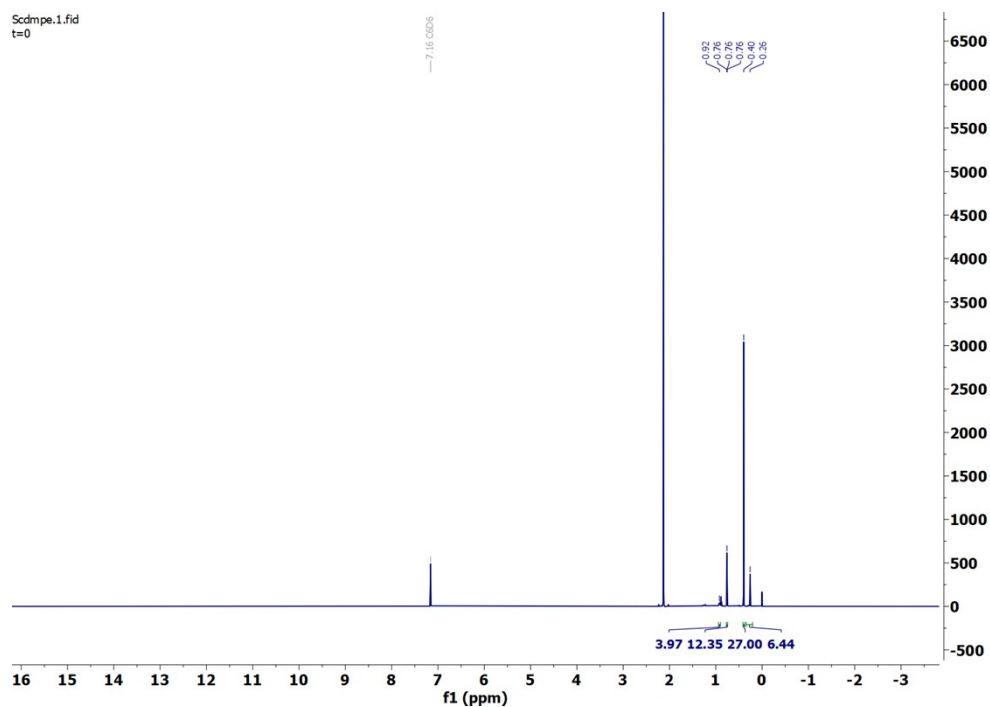

Figure S 28  $^1\text{H}$  NMR spectrum (600 MHz) of Sc-DMPE in  $d_6$ -benzene.

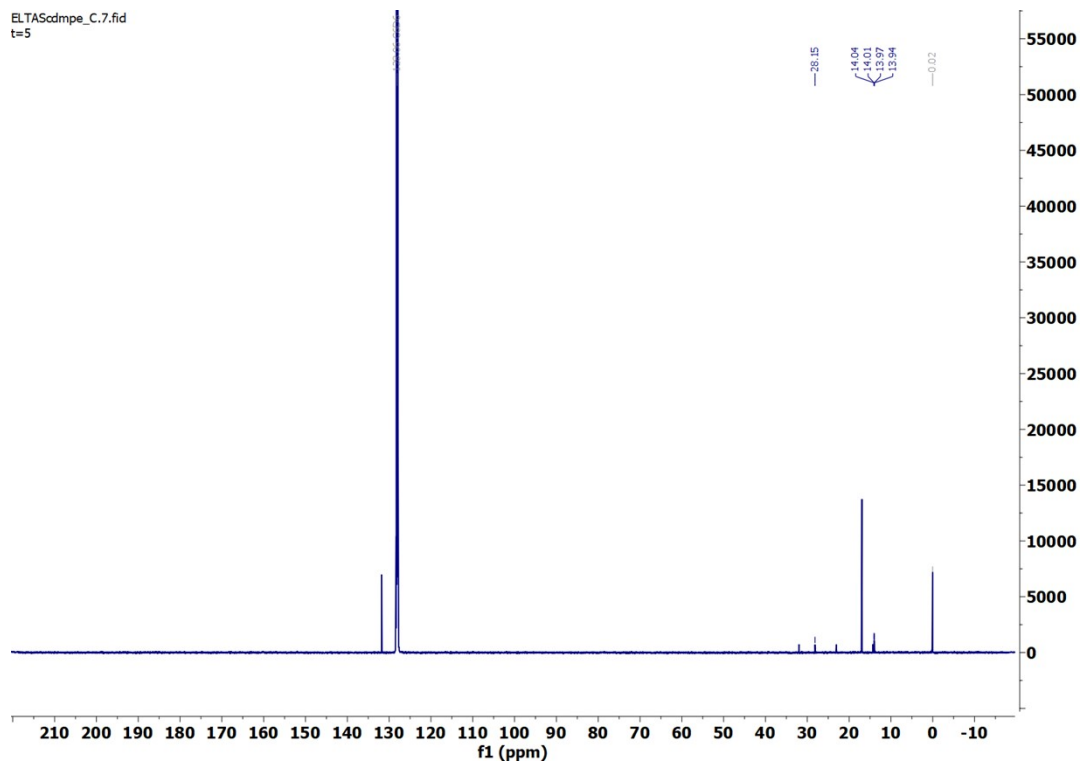

**Figure S 29**  $^{13}\text{C}\{^1\text{H}\}$  NMR spectrum (151 MHz) of **Sc-DMPE** in  $d_6$ -benzene.

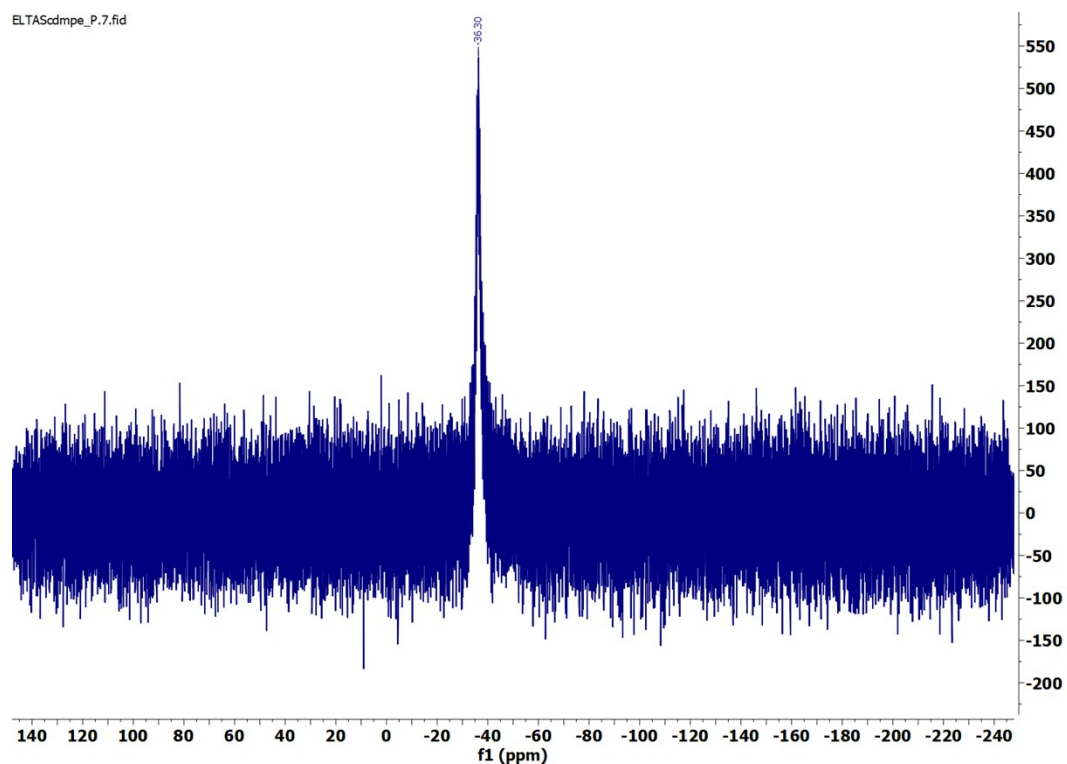

**Figure S 30**  $^{31}\text{P}$  NMR spectrum (243 MHz,  $\text{C}_6\text{D}_6$ ) of **Sc-DMPE** in  $d_6$ -benzene.

### 2.15. Synthesis of LiCl-free $Y(CH_2SiMe_3)_3(C_4H_8O)_2$ (Y-THF)

In an Ar-filled glovebox, anhydrous  $YCl_3$  (26 mg, 0.133 mmol) was suspended in 260  $\mu$ L THF and 2.6 mL  $Et_2O$ /pentane (1/1). The resulting white suspension was cooled to  $-78^\circ C$  and  $NaCH_2SiMe_3$  (44 mg, 0.4 mmol, 3 eq.) was added portionwise as a solid. After stirring the resulting white suspension for 1 h at  $-78^\circ C$ , it was warmed to room temperature for 15 min. Filtration and removal of the solvent at  $-40^\circ C$  yielded the title compound as a white crystalline solid. Yield: 28 mg, 44% based on  $YCl_3$ .

$^1H$  NMR (600 MHz,  $C_6D_6$ )  $\delta$  3.88 (s, 8H), 1.34 – 1.32 (m, 8H), 0.30 (s, 27H), -0.68 (d,  $J$  = 2.7 Hz, 6H).  
 $^{13}C$  NMR (151 MHz,  $C_6D_6$ )  $\delta$  65.90, 25.15, 15.55, 4.63.

Anal. Calcd for  $YC_{20}H_{49}Si_3O_2$ : C, 48.55; H, 9.98. Found: C, 48.43; H, 9.81.



### 3. Single-Crystal X-ray Diffraction Data (SXRD)

CCDC submission summary for codes 2351142-2351150, 2369795

-----  
Summary of Data - Deposition Number 2351142  
-----

Compound Name:

Data Block Name: data\_pla23171\_auto

Unit Cell Parameters: a 9.9283(3) b 32.1189(7) c 10.3633(3) P21/n  
-----

-----  
Summary of Data - Deposition Number 2351143  
-----

Compound Name:

Data Block Name: data\_lug3\_abair\_arnold

Unit Cell Parameters: a 10.6318(3) b 9.5844(3) c 29.2885(7) P21/c  
-----

-----  
Summary of Data - Deposition Number 2351144  
-----

Compound Name:

Data Block Name: data\_pla25059\_refinalized

Unit Cell Parameters: a 10.26960(10) b 15.03040(10) c 17.60830(10) P212121  
-----

-----  
Summary of Data - Deposition Number 2351145  
-----

Compound Name:

Data Block Name: data\_pla24006\_refinalized

Unit Cell Parameters: a 9.48680(10) b 15.77720(10) c 18.69720(10) P21/n  
-----

-----  
Summary of Data - Deposition Number 2351146  
-----

Compound Name:

Data Block Name: data\_pla24028\_refinalized

Unit Cell Parameters: a 19.06420(10) b 15.98610(10) c 19.10330(10) P21/n  
-----

-----  
Summary of Data - Deposition Number 2351147  
-----

Compound Name:

Data Block Name: data\_pla23043\_refinalized

Unit Cell Parameters: a 11.1358(2) b 18.3119(3) c 13.4974(2) P21/n  
-----

-----  
Summary of Data - Deposition Number 2351148  
-----

Compound Name:  
Data Block Name: data\_pla23105\_refinalized  
Unit Cell Parameters: a 10.49690(10) b 18.04320(10) c 18.05330(10) P212121  
-----  
-----

Summary of Data - Deposition Number 2351149  
-----

Compound Name:  
Data Block Name: data\_pla24060\_refinalized  
Unit Cell Parameters: a 16.9327(2) b 9.51690(10) c 18.2023(2) Pna21  
-----  
-----

Summary of Data - Deposition Number 2351150  
-----

Compound Name:  
Data Block Name: data\_pla23157\_auto  
Unit Cell Parameters: a 9.76140(10) b 16.1956(2) c 17.1923(2) P212121  
-----  
-----

Summary of Data - Deposition Number 2369795  
-----

Compound Name:  
Data Block Name: data\_pla24134\_refinalized  
Unit Cell Parameters: a 9.87370(10) b 16.22530(10) c 17.35450(10) P212121

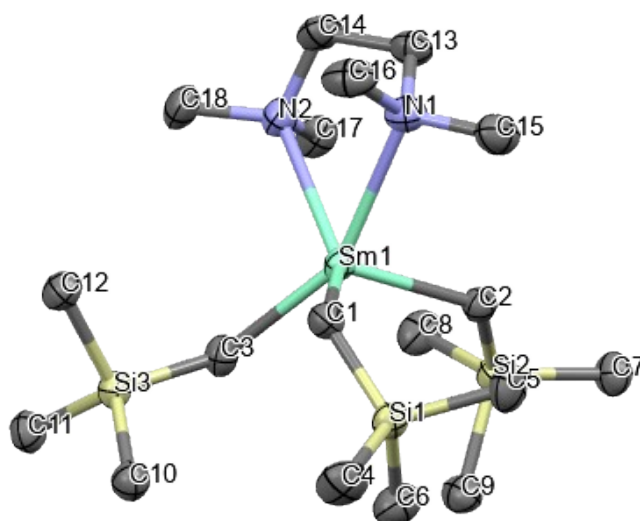

**Fig. S31** Molecular structure of Sm-TMEDA with thermal ellipsoids at 50% probability with hydrogen atoms are omitted for the clarity. Sm: turquoise, C: grey, N: blue, Si: yellow.

**Table S1.** Sample and crystal data of Sm-TMEDA

|                                                       |                                                                  |                                                   |                                                                             |                                                   |
|-------------------------------------------------------|------------------------------------------------------------------|---------------------------------------------------|-----------------------------------------------------------------------------|---------------------------------------------------|
| <b>Chemical formula</b>                               | <b>SmC<sub>18</sub>H<sub>49</sub>Si<sub>3</sub>N<sub>2</sub></b> | <b>Crystal system</b>                             | <b>orthorhombic</b>                                                         |                                                   |
| <b>Formula weight [g/mol]</b>                         | 528.21                                                           | <b>Space group</b>                                | <i>P</i> 2 <sub>1</sub> 2 <sub>1</sub> 2 <sub>1</sub>                       |                                                   |
| <b>Temperature [K]</b>                                | 99.9(4)                                                          | <b>Z</b>                                          | 1                                                                           |                                                   |
| <b>Measurement method</b>                             | $\phi$ and $\omega$ scans                                        | <b>Volume [Å<sup>3</sup>]</b>                     | 2780.26(4)                                                                  |                                                   |
| <b>Radiation (Wavelength [Å])</b>                     | Cu K $\alpha$ ( $\lambda$ = 1.54184)                             | <b>Unit cell dimensions [Å] and [°]</b>           | 9.87370(10)                                                                 | 90                                                |
| <b>Crystal size / [mm<sup>3</sup>]</b>                | 0.216 × 0.159 × 0.074                                            |                                                   | 16.22530(10)                                                                | 90                                                |
| <b>Crystal habit</b>                                  | clear yellow block                                               |                                                   | 17.35450(10)                                                                | 90                                                |
| <b>Density (calculated) / [g/cm<sup>3</sup>]</b>      | 1.262                                                            | <b>Absorption coefficient / [mm<sup>-1</sup>]</b> | 17.107                                                                      |                                                   |
| <b>Abs. correction Tmin</b>                           | 0.119                                                            | <b>Abs. correction Tmax</b>                       | 0.364                                                                       |                                                   |
| <b>Abs. correction type</b>                           | multi-scan                                                       | <b>F(000) [e<sup>-</sup>]</b>                     | 1100.0                                                                      |                                                   |
| <b>Index ranges</b>                                   | -12 ≤ h ≤ 12, -20 ≤ k ≤ 20, -22 ≤ l ≤ 20                         | <b>Theta range for data collection [°]</b>        | 7.458 to 159.862                                                            |                                                   |
| <b>Reflections number</b>                             | 58576                                                            | <b>Data / restraints / parameters</b>             | 6043/0/230                                                                  |                                                   |
| <b>Refinement method</b>                              | Least squares                                                    | <b>Final R indices</b>                            | all data                                                                    | R <sub>1</sub> = 0.0313, wR <sub>2</sub> = 0.0856 |
| <b>Function minimized</b>                             | $\sum w(F_o^2 - F_c^2)^2$                                        |                                                   | I > 2 $\sigma$ (I)                                                          | R <sub>1</sub> = 0.0311, wR <sub>2</sub> = 0.0855 |
| <b>Goodness-of-fit on F<sup>2</sup></b>               | 1.111                                                            | <b>Weighting scheme</b>                           | w = 1 / [ $\sigma^2(F_o^2) + (0.0552P)^2 + 2.6302P$ ]                       |                                                   |
| <b>Largest diff. peak and hole [e Å<sup>-3</sup>]</b> | 1.32/-1.14                                                       |                                                   | where P = (F <sub>o</sub> <sup>2</sup> + 2F <sub>c</sub> <sup>2</sup> ) / 3 |                                                   |

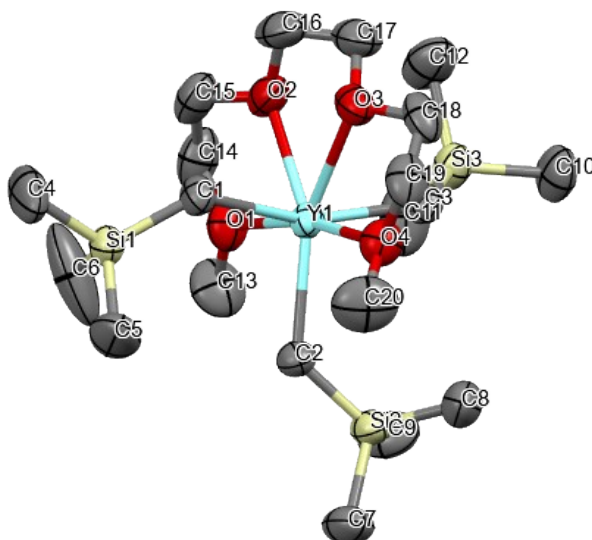

**Fig. S32** Molecular structure of **Y-G<sub>3</sub>** with thermal ellipsoids at 50% probability with hydrogen atoms are omitted for the clarity. Y: turquoise, C: grey, O: red, Si: yellow.

**Table S2.** Sample and crystal data of **Y-G<sub>3</sub>**

| Chemical formula                                    | $\text{Y}(\text{CH}_2\text{SiMe}_3)_3(\text{C}_8\text{H}_{18}\text{O}_4)$ | Crystal system                                         | monoclinic                                  |                               |
|-----------------------------------------------------|---------------------------------------------------------------------------|--------------------------------------------------------|---------------------------------------------|-------------------------------|
| Formula weight [g/mol]                              | 528.78                                                                    | Space group                                            | $P2_1/n$                                    |                               |
| Temperature [K]                                     | 199.99(10)                                                                | Z                                                      | 1                                           |                               |
| Measurement method                                  | $\phi$ and $\omega$ scans                                                 | Volume [ $\text{\AA}^3$ ]                              | 3052.23(17)                                 |                               |
| Radiation (Wavelength [ $\text{\AA}$ ])             | Cu $K\alpha$ ( $\lambda = 1.54184$ )                                      | Unit cell dimensions [ $\text{\AA}$ ] and [ $^\circ$ ] | 9.9283(3)                                   | 90                            |
| Crystal size / [ $\text{mm}^3$ ]                    | $0.16 \times 0.11 \times 0.1$                                             |                                                        | 32.1189(7)                                  | 112.542(4)                    |
| Crystal habit                                       | clear colorless block                                                     |                                                        | 10.3633(3)                                  | 90                            |
| Density (calculated) / [ $\text{g/cm}^3$ ]          | 1.151                                                                     | Absorption coefficient / [ $\text{mm}^{-1}$ ]          | 3.965                                       |                               |
| Abs. correction Tmin                                | 0.569                                                                     | Abs. correction Tmax                                   | 0.693                                       |                               |
| Abs. correction type                                | multi-scan                                                                | F(000) [e <sup>-</sup> ]                               | 1136.0                                      |                               |
| Index ranges                                        | $-12 \leq h \leq 12, -21 \leq k \leq 40, -13 \leq l \leq 13$              | Theta range for data collection [ $^\circ$ ]           | 5.502 to 160.098                            |                               |
| Reflections number                                  | 18955                                                                     | Data / restraints / parameters                         | 6475/0/272                                  |                               |
| Refinement method                                   | Least squares                                                             | Final R indices                                        | all data                                    | $R_1 = 0.0563, wR_2 = 0.1499$ |
| Function minimized                                  | $\sum w(F_o^2 - F_c^2)^2$                                                 |                                                        | $ >2\sigma(I)$                              | $R_1 = 0.0490, wR_2 = 0.1440$ |
| Goodness-of-fit on $F^2$                            | 1.070                                                                     | Weighting scheme                                       | $w=1/[\sigma^2(F_o^2)+(0.0873P)^2+0.9693P]$ |                               |
| Largest diff. peak and hole [ $e \text{\AA}^{-3}$ ] | 0.63/-0.72                                                                |                                                        | where $P=(F_o^2+2F_c^2)/3$                  |                               |

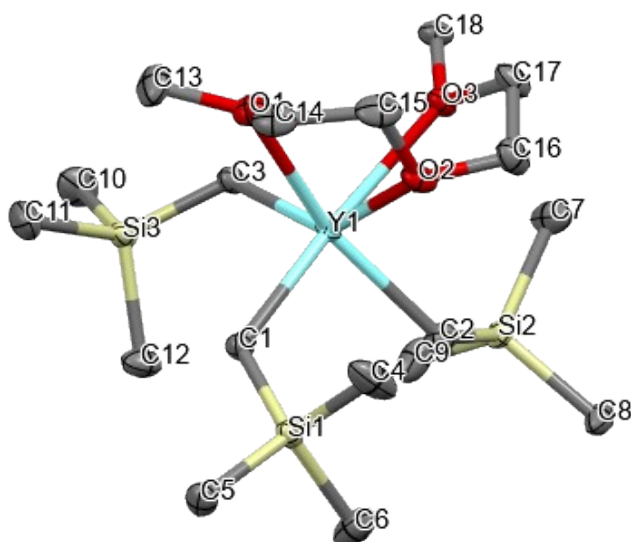

**Fig. S33** Molecular structure of **Y-G<sub>2</sub>** with thermal ellipsoids at 50% probability with hydrogen atoms are omitted for the clarity. Y: turquoise, C: grey, O: red, Si: yellow.

**Table S3.** Sample and crystal data of **Y-G<sub>2</sub>**

|                                                       |                                                                                                |                                                   |                                                                                            |                                                   |
|-------------------------------------------------------|------------------------------------------------------------------------------------------------|---------------------------------------------------|--------------------------------------------------------------------------------------------|---------------------------------------------------|
| <b>Chemical formula</b>                               | <b>Y(CH<sub>2</sub>SiMe<sub>3</sub>)<sub>3</sub>(C<sub>6</sub>H<sub>14</sub>O<sub>3</sub>)</b> | <b>Crystal system</b>                             | <b>monoclinic</b>                                                                          |                                                   |
| <b>Formula weight [g/mol]</b>                         | 484.73                                                                                         | <b>Space group</b>                                | <i>P2<sub>1</sub>/n</i>                                                                    |                                                   |
| <b>Temperature [K]</b>                                | 99.99(11)                                                                                      | <b>Z</b>                                          | 1                                                                                          |                                                   |
| <b>Measurement method</b>                             | $\phi$ and $\omega$ scans                                                                      | <b>Volume [Å<sup>3</sup>]</b>                     | 2750.13(8)                                                                                 |                                                   |
| <b>Radiation (Wavelength [Å])</b>                     | Mo K $\alpha$ ( $\lambda = 0.71073$ )                                                          | <b>Unit cell dimensions [Å] and [°]</b>           | 11.1358(2)                                                                                 | 90                                                |
| <b>Crystal size / [mm<sup>3</sup>]</b>                | 0.428 × 0.112 × 0.109                                                                          |                                                   | 18.3119(3)                                                                                 | 92.304(2)                                         |
| <b>Crystal habit</b>                                  | clear colorless block                                                                          |                                                   | 13.4974(2)                                                                                 | 90                                                |
| <b>Density (calculated) / [g/cm<sup>3</sup>]</b>      | 1.171                                                                                          | <b>Absorption coefficient / [mm<sup>-1</sup>]</b> | 2.264                                                                                      |                                                   |
| <b>Abs. correction Tmin</b>                           | 0.444                                                                                          | <b>Abs. correction Tmax</b>                       | 0.790                                                                                      |                                                   |
| <b>Abs. correction type</b>                           | multi-scan                                                                                     | <b>F(000) [e<sup>-</sup>]</b>                     | 1040.0                                                                                     |                                                   |
| <b>Index ranges</b>                                   | -15 ≤ h ≤ 16, -26 ≤ k ≤ 26, -20 ≤ l ≤ 19                                                       | <b>Theta range for data collection [°]</b>        | 3.75 to 64.742                                                                             |                                                   |
| <b>Reflections number</b>                             | 74421                                                                                          | <b>Data / restraints / parameters</b>             | 8757/0/237                                                                                 |                                                   |
| <b>Refinement method</b>                              | Least squares                                                                                  | <b>Final R indices</b>                            | all data                                                                                   | R <sub>1</sub> = 0.0389, wR <sub>2</sub> = 0.0547 |
| <b>Function minimized</b>                             | $\Sigma w(F_o^2 - F_c^2)^2$                                                                    |                                                   | l > 2σ(l)                                                                                  | R <sub>1</sub> = 0.0302, wR <sub>2</sub> = 0.0531 |
| <b>Goodness-of-fit on F<sup>2</sup></b>               | 1.099                                                                                          | <b>Weighting scheme</b>                           | w = 1 / [σ <sup>2</sup> (F <sub>o</sub> <sup>2</sup> ) + (0.0199P) <sup>2</sup> + 0.9981P] |                                                   |
| <b>Largest diff. peak and hole [e Å<sup>-3</sup>]</b> | 0.46/-0.29                                                                                     |                                                   | where P = (F <sub>o</sub> <sup>2</sup> + 2F <sub>c</sub> <sup>2</sup> ) / 3                |                                                   |

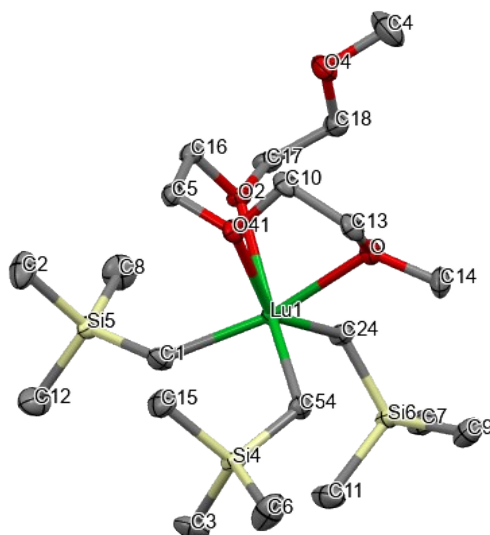

**Fig. S34** Molecular structure of Lu-G<sub>3</sub> with thermal ellipsoids at 50% probability with hydrogen atoms are omitted for the clarity. Lu: green, C: grey, O: red, Si: yellow.

**Table S4.** Sample and crystal data of Lu-G<sub>3</sub>

|                                                       |                                                                                                      |                                                   |                                                                        |                                                   |
|-------------------------------------------------------|------------------------------------------------------------------------------------------------------|---------------------------------------------------|------------------------------------------------------------------------|---------------------------------------------------|
| <b>Chemical formula</b>                               | Lu(CH <sub>2</sub> SiMe <sub>3</sub> ) <sub>3</sub> (C <sub>8</sub> H <sub>18</sub> O <sub>4</sub> ) | <b>Crystal system</b>                             | monoclinic                                                             |                                                   |
| <b>Formula weight [g/mol]</b>                         | 614.84                                                                                               | <b>Space group</b>                                | <i>P2<sub>1</sub>/c</i>                                                |                                                   |
| <b>Temperature [K]</b>                                | 293(2)                                                                                               | <b>Z</b>                                          | 1                                                                      |                                                   |
| <b>Measurement method</b>                             | $\phi$ and $\omega$ scans                                                                            | <b>Volume [Å<sup>3</sup>]</b>                     | 2984.40(14)                                                            |                                                   |
| <b>Radiation (Wavelength [Å])</b>                     | MoK $\alpha$ ( $\lambda = 0.71073$ )                                                                 | <b>Unit cell dimensions [Å] and [°]</b>           | 10.6318(3)                                                             | 90                                                |
| <b>Crystal size / [mm<sup>3</sup>]</b>                | 0.32 × 0.25 × 0.21                                                                                   |                                                   | 9.5844(3)                                                              | 90.415(2)                                         |
| <b>Crystal habit</b>                                  | clear colorless block                                                                                |                                                   | 29.2885(7)                                                             | 90                                                |
| <b>Density (calculated) / [g/cm<sup>3</sup>]</b>      | 1.368                                                                                                | <b>Absorption coefficient / [mm<sup>-1</sup>]</b> | 3.448                                                                  |                                                   |
| <b>Abs. correction Tmin</b>                           | 0.405                                                                                                | <b>Abs. correction Tmax</b>                       | 0.531                                                                  |                                                   |
| <b>Abs. correction type</b>                           | multi-scan                                                                                           | <b>F(000) [e<sup>-</sup>]</b>                     | 1264.0                                                                 |                                                   |
| <b>Index ranges</b>                                   | -13 ≤ h ≤ 13, -11 ≤ k ≤ 11, -36 ≤ l ≤ 36                                                             | <b>Theta range for data collection [°]</b>        | 5.882 to 52.74                                                         |                                                   |
| <b>Reflections number</b>                             | 44266                                                                                                | <b>Data / restraints / parameters</b>             | 6086/0/265                                                             |                                                   |
| <b>Refinement method</b>                              | Least squares                                                                                        | <b>Final R indices</b>                            | all data                                                               | R <sub>1</sub> = 0.0253, wR <sub>2</sub> = 0.0566 |
| <b>Function minimized</b>                             | $\sum w(F_o^2 - F_c^2)^2$                                                                            |                                                   | >2 $\sigma$ (I)                                                        | R <sub>1</sub> = 0.0240, wR <sub>2</sub> = 0.0558 |
| <b>Goodness-of-fit on F<sup>2</sup></b>               | 1.090                                                                                                | <b>Weighting scheme</b>                           | w=1/[ $\sigma^2(F_o^2)+(0.0161P)^2+9.2682P$ ]                          |                                                   |
| <b>Largest diff. peak and hole [e Å<sup>-3</sup>]</b> | 1.87/-1.17                                                                                           |                                                   | where P=(F <sub>o</sub> <sup>2</sup> +2F <sub>c</sub> <sup>2</sup> )/3 |                                                   |

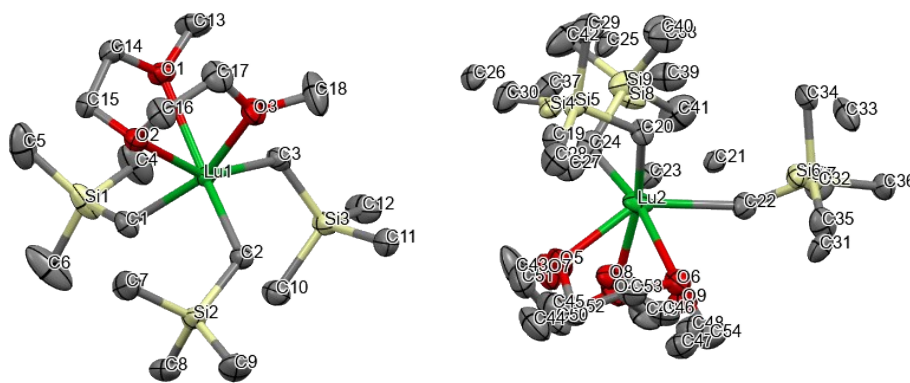

**Fig. S35** Molecular structure of Lu-G<sub>2</sub> with thermal ellipsoids at 50% probability with hydrogen atoms are omitted for the clarity. Lu: green, C: grey, O: red, Si: yellow. Bonds at the suppressed positions (45.4% occupancy) in the disordered molecule are omitted for clarity.

**Table S5.** Sample and crystal data of Lu-G<sub>2</sub>

|                                                       |                                                                                                      |                                                   |                                                                             |                                                   |
|-------------------------------------------------------|------------------------------------------------------------------------------------------------------|---------------------------------------------------|-----------------------------------------------------------------------------|---------------------------------------------------|
| <b>Chemical formula</b>                               | Lu(CH <sub>2</sub> SiMe <sub>3</sub> ) <sub>3</sub> (C <sub>6</sub> H <sub>14</sub> O <sub>3</sub> ) | <b>Crystal system</b>                             | monoclinic                                                                  |                                                   |
| <b>Formula weight [g/mol]</b>                         | 4562.31                                                                                              | <b>Space group</b>                                | <i>P</i> 2 <sub>1</sub> / <i>n</i>                                          |                                                   |
| <b>Temperature [K]</b>                                | 100.00(10)                                                                                           | <b>Z</b>                                          | 2                                                                           |                                                   |
| <b>Measurement method</b>                             | $\phi$ and $\omega$ scans                                                                            | <b>Volume [Å<sup>3</sup>]</b>                     | 5562.61(6)                                                                  |                                                   |
| <b>Radiation (Wavelength [Å])</b>                     | Cu K $\alpha$ ( $\lambda = 1.54184$ )                                                                | <b>Unit cell dimensions [Å] and [°]</b>           | 19.06420(10)                                                                | 90                                                |
| <b>Crystal size / [mm<sup>3</sup>]</b>                | 0.246 × 0.179 × 0.127                                                                                |                                                   | 15.98610(10)                                                                | 107.1660(10)                                      |
| <b>Crystal habit</b>                                  | clear colorless block                                                                                |                                                   | 19.10330(10)                                                                | 90                                                |
| <b>Density (calculated) / [g/cm<sup>3</sup>]</b>      | 1.362                                                                                                | <b>Absorption coefficient / [mm<sup>-1</sup>]</b> | 8.121                                                                       |                                                   |
| <b>Abs. correction Tmin</b>                           | 0.240                                                                                                | <b>Abs. correction Tmax</b>                       | 0.425                                                                       |                                                   |
| <b>Abs. correction type</b>                           | multi-scan                                                                                           | <b>F(000) [e<sup>-</sup>]</b>                     | 2332.0                                                                      |                                                   |
| <b>Index ranges</b>                                   | -24 ≤ <i>h</i> ≤ 24, -20 ≤ <i>k</i> ≤ 14, -24 ≤ <i>l</i> ≤ 24                                        | <b>Theta range for data collection [°]</b>        | 5.754 to 160.398                                                            |                                                   |
| <b>Reflections number</b>                             | 123523                                                                                               | <b>Data / restraints / parameters</b>             | 12072/0/665                                                                 |                                                   |
| <b>Refinement method</b>                              | Least squares                                                                                        | <b>Final R indices</b>                            | all data                                                                    | R <sub>1</sub> = 0.0386, wR <sub>2</sub> = 0.0971 |
| <b>Function minimized</b>                             | $\Sigma w(F_o^2 - F_c^2)^2$                                                                          |                                                   | <i>l</i> > 2 $\sigma$ ( <i>l</i> )                                          | R <sub>1</sub> = 0.0363, wR <sub>2</sub> = 0.0950 |
| <b>Goodness-of-fit on F<sup>2</sup></b>               | 1.079                                                                                                | <b>Weighting scheme</b>                           | w = 1 / [ $\sigma^2(F_o^2) + (0.0458P)^2 + 12.7298P$ ]                      |                                                   |
| <b>Largest diff. peak and hole [e Å<sup>-3</sup>]</b> | 1.77/-2.15                                                                                           |                                                   | where P = (F <sub>o</sub> <sup>2</sup> + 2F <sub>c</sub> <sup>2</sup> ) / 3 |                                                   |

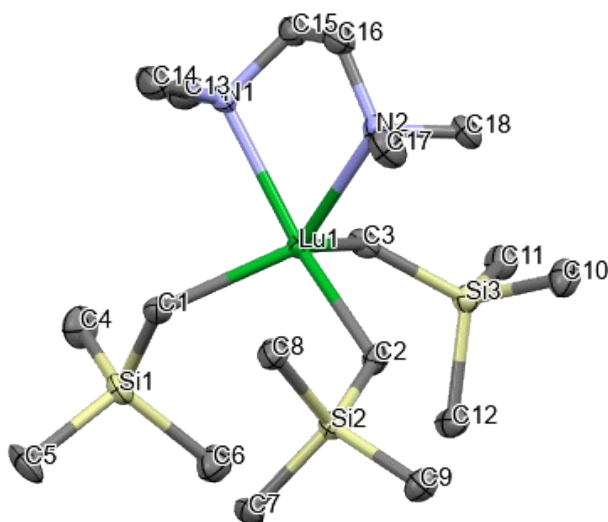

**Fig. S36** Molecular structure of Lu-TMEDA with thermal ellipsoids at 50% probability with hydrogen atoms are omitted for the clarity. Lu: green, C: grey, N: blue, Si: yellow.

**Table S6.** Sample and crystal data of Lu-TMEDA

|                                                     |                                                              |                                                        |                                             |                               |
|-----------------------------------------------------|--------------------------------------------------------------|--------------------------------------------------------|---------------------------------------------|-------------------------------|
| Chemical formula                                    | $\text{LuC}_{18}\text{H}_{49}\text{Si}_3\text{N}_2$          | Crystal system                                         | orthorhombic                                |                               |
| Formula weight [g/mol]                              | 552.83                                                       | Space group                                            | $P2_12_12_1$                                |                               |
| Temperature [K]                                     | 99.97(11)                                                    | Z                                                      | 1                                           |                               |
| Measurement method                                  | $\phi$ and $\omega$ scans                                    | Volume [ $\text{\AA}^3$ ]                              | 2717.96(5)                                  |                               |
| Radiation (Wavelength [ $\text{\AA}$ ])             | Cu $K\alpha$ ( $\lambda = 1.54184$ )                         | Unit cell dimensions [ $\text{\AA}$ ] and [ $^\circ$ ] | 9.76140(10)                                 | 90                            |
| Crystal size / [ $\text{mm}^3$ ]                    | $0.12 \times 0.06 \times 0.05$                               |                                                        | 16.1956(2)                                  | 90                            |
| Crystal habit                                       | clear colorless block                                        |                                                        | 17.1923(2)                                  | 90                            |
| Density (calculated) / [ $\text{g/cm}^3$ ]          | 1.351                                                        | Absorption coefficient / [ $\text{mm}^{-1}$ ]          | 8.228                                       |                               |
| Abs. correction Tmin                                | 0.438                                                        | Abs. correction Tmax                                   | 0.684                                       |                               |
| Abs. correction type                                | multi-scan                                                   | F(000) [e]                                             | 1136.0                                      |                               |
| Index ranges                                        | $-12 \leq h \leq 12, -20 \leq k \leq 18, -21 \leq l \leq 21$ | Theta range for data collection [ $^\circ$ ]           | 7.5 to 159.812                              |                               |
| Reflections number                                  | 59230                                                        | Data / restraints / parameters                         | 5898/0/246                                  |                               |
| Refinement method                                   | Least squares                                                | Final R indices                                        | all data                                    | $R_1 = 0.0397, wR_2 = 0.0909$ |
| Function minimized                                  | $\sum w(F_o^2 - F_c^2)^2$                                    |                                                        | $ >2\sigma(I)$                              | $R_1 = 0.0389, wR_2 = 0.0907$ |
| Goodness-of-fit on $F^2$                            | 1.049                                                        | Weighting scheme                                       | $w=1/[\sigma^2(F_o^2)+(0.0264)^2+18.3519P]$ |                               |
| Largest diff. peak and hole [ $e \text{\AA}^{-3}$ ] | 1.22/-1.30                                                   |                                                        | where $P=(F_o^2+2F_c^2)/3$                  |                               |



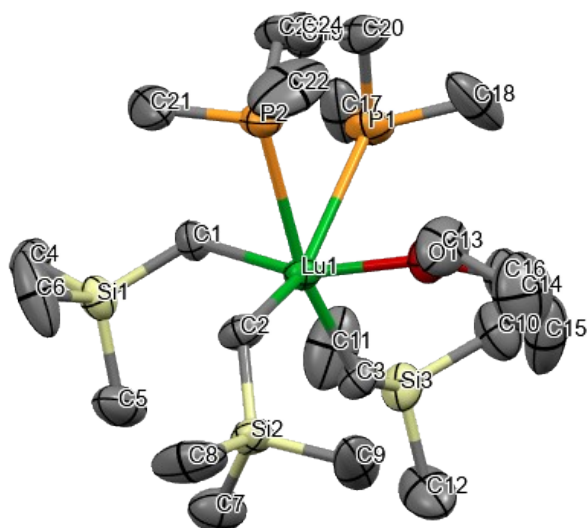

**Fig. S37** Molecular structure of Lu-DMPE with thermal ellipsoids at 50% probability with hydrogen atoms are omitted for the clarity. Lu: green, C: grey, P: orange, Si: yellow, O: red.

**Table S7.** Sample and crystal data of Lu-DMPE

|                                                                      |                                                              |                                                                                 |                                             |                                    |
|----------------------------------------------------------------------|--------------------------------------------------------------|---------------------------------------------------------------------------------|---------------------------------------------|------------------------------------|
| <b>Chemical formula</b>                                              | $\text{LuC}_{22}\text{H}_{57}\text{Si}_3\text{P}_2\text{O}$  | <b>Crystal system</b>                                                           | orthorhombic                                |                                    |
| <b>Formula weight [g/mol]</b>                                        | 658.85                                                       | <b>Space group</b>                                                              | $P2_12_12_1$                                |                                    |
| <b>Temperature [K]</b>                                               | 99.98(13)                                                    | <b>Z</b>                                                                        | 1                                           |                                    |
| <b>Measurement method</b>                                            | $\phi$ and $\omega$ scans                                    | <b>Volume [<math>\text{\AA}^3</math>]</b>                                       | 3419.25(4)                                  |                                    |
| <b>Radiation (Wavelength [<math>\text{\AA}</math>])</b>              | Cu $K\alpha$ ( $\lambda = 1.54184$ )                         | <b>Unit cell dimensions [<math>\text{\AA}</math>] and [<math>^\circ</math>]</b> | 10.49690(10)                                | 90                                 |
| <b>Crystal size / [<math>\text{mm}^3</math>]</b>                     | $0.23 \times 0.1 \times 0.08$                                |                                                                                 | 18.04320(10)                                | 90                                 |
| <b>Crystal habit</b>                                                 | clear colorless block                                        |                                                                                 | 18.05330(10)                                | 90                                 |
| <b>Density (calculated) / [<math>\text{g/cm}^3</math>]</b>           | 1.268                                                        | <b>Absorption coefficient / [<math>\text{mm}^{-1}</math>]</b>                   | 7.485                                       |                                    |
| <b>Abs. correction Tmin</b>                                          | 0.278                                                        | <b>Abs. correction Tmax</b>                                                     | 0.586                                       |                                    |
| <b>Abs. correction type</b>                                          | multi-scan                                                   | <b>F(000) [<math>e^-</math>]</b>                                                | 1336.0                                      |                                    |
| <b>Index ranges</b>                                                  | $-13 \leq h \leq 13, -22 \leq k \leq 23, -23 \leq l \leq 22$ | <b>Theta range for data collection [<math>^\circ</math>]</b>                    | 6.926 to 161.3                              |                                    |
| <b>Reflections number</b>                                            | 229465                                                       | <b>Data / restraints / parameters</b>                                           | 7472/6/293                                  |                                    |
| <b>Refinement method</b>                                             | Least squares                                                | <b>Final R indices</b>                                                          | all data                                    | $R_1 = 0.0314,$<br>$wR_2 = 0.0861$ |
| <b>Function minimized</b>                                            | $\sum w(F_o^2 - F_c^2)^2$                                    |                                                                                 | $ >2\sigma(I)$                              | $R_1 = 0.0308,$<br>$wR_2 = 0.0855$ |
| <b>Goodness-of-fit on <math>F^2</math></b>                           | 1.054                                                        | <b>Weighting scheme</b>                                                         | $w=1/[\sigma^2(F_o^2)+(0.0516P)^2+2.9340P]$ |                                    |
| <b>Largest diff. peak and hole [<math>e \text{ \AA}^{-3}</math>]</b> | 1.17/-0.64                                                   |                                                                                 | where $P=(F_o^2+2F_c^2)/3$                  |                                    |

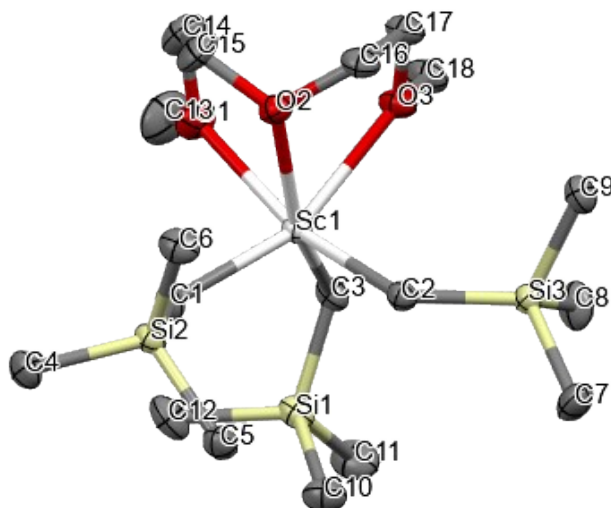

**Fig. S38** Molecular structure of Sc-G<sub>2</sub> with thermal ellipsoids at 50% probability with hydrogen atoms are omitted for the clarity. Sc: grey, C: grey, Si: yellow, O: red.

**Table S8.** Sample and crystal data of Sc-G<sub>2</sub>

|                                                       |                                                                  |                                                   |                                                                        |                              |
|-------------------------------------------------------|------------------------------------------------------------------|---------------------------------------------------|------------------------------------------------------------------------|------------------------------|
| <b>Chemical formula</b>                               | ScC <sub>18</sub> H <sub>47</sub> Si <sub>3</sub> O <sub>3</sub> | <b>Crystal system</b>                             | monoclinic                                                             |                              |
| <b>Formula weight [g/mol]</b>                         | 440.78                                                           | <b>Space group</b>                                | <i>P</i> 2 <sub>1</sub> / <i>n</i>                                     |                              |
| <b>Temperature [K]</b>                                | 99.98(10)                                                        | <b>Z</b>                                          | 1                                                                      |                              |
| <b>Measurement method</b>                             | $\phi$ and $\omega$ scans                                        | <b>Volume [Å<sup>3</sup>]</b>                     | 2737.80(4)                                                             |                              |
| <b>Radiation (Wavelength [Å])</b>                     | Cu K $\alpha$ ( $\lambda$ = 1.54184)                             | <b>Unit cell dimensions [Å] and [°]</b>           | 9.48680(10)                                                            | 90                           |
| <b>Crystal size / [mm<sup>3</sup>]</b>                | 0.2 × 0.15 × 0.09                                                |                                                   | 15.77720(10)                                                           | 101.9560(10)                 |
| <b>Crystal habit</b>                                  | clear colorless block                                            |                                                   | 18.69720(10)                                                           | 90                           |
| <b>Density (calculated) / [g/cm<sup>3</sup>]</b>      | 1.069                                                            | <b>Absorption coefficient / [mm<sup>-1</sup>]</b> | 3.648                                                                  |                              |
| <b>Abs. correction Tmin</b>                           | 0.529                                                            | <b>Abs. correction Tmax</b>                       | 0.735                                                                  |                              |
| <b>Abs. correction type</b>                           | multi-scan                                                       | <b>F(000) [e<sup>-</sup>]</b>                     | 968.0                                                                  |                              |
| <b>Index ranges</b>                                   | -10 ≤ <i>h</i> ≤ 12, -20 ≤ <i>k</i> ≤ 20, -23 ≤ <i>l</i> ≤ 23    | <b>Theta range for data collection [°]</b>        | 7.4 to 160.086                                                         |                              |
| <b>Reflections number</b>                             | 61454                                                            | <b>Data / restraints / parameters</b>             | 5972/0/253                                                             |                              |
| <b>Refinement method</b>                              | Least squares                                                    | <b>Final R indices</b>                            | all data                                                               | R1 = 0.0315,<br>wR2 = 0.0851 |
| <b>Function minimized</b>                             | $\Sigma w(F_o^2 - F_c^2)^2$                                      |                                                   | >2 $\sigma$ ( <i>I</i> )                                               | R1 = 0.0303,<br>wR2 = 0.0841 |
| <b>Goodness-of-fit on F<sup>2</sup></b>               | 1.110                                                            | <b>Weighting scheme</b>                           | w=1/[ $\sigma^2(F_o^2)+(0.0495P)^2+0.6268P$ ]                          |                              |
| <b>Largest diff. peak and hole [e Å<sup>-3</sup>]</b> | 0.66/-0.31                                                       |                                                   | where P=(F <sub>o</sub> <sup>2</sup> +2F <sub>c</sub> <sup>2</sup> )/3 |                              |

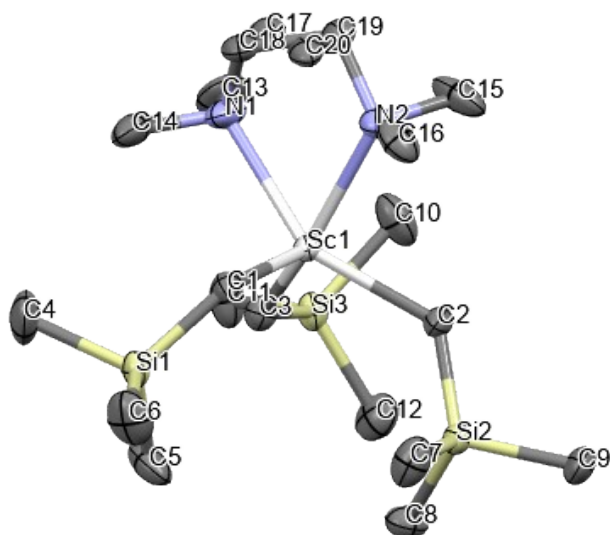

**Fig. S39** Molecular structure of Sc-TMEDA with thermal ellipsoids at 50% probability with hydrogen atoms are omitted for the clarity. Sc: grey, C: grey, Si: yellow, N: blue.

**Table S9.** Sample and crystal data of Sc-TMEDA

|                                                  |                                                                  |                                              |                                                                        |                                                   |
|--------------------------------------------------|------------------------------------------------------------------|----------------------------------------------|------------------------------------------------------------------------|---------------------------------------------------|
| Chemical formula                                 | ScC <sub>18</sub> H <sub>49</sub> Si <sub>3</sub> N <sub>2</sub> | Crystal system                               | orthorhombic                                                           |                                                   |
| Formula weight [g/mol]                           | 422.82                                                           | Space group                                  | P2 <sub>1</sub> 2 <sub>1</sub> 2 <sub>1</sub>                          |                                                   |
| Temperature [K]                                  | 100.00(11)                                                       | Z                                            | 1                                                                      |                                                   |
| Measurement method                               | $\phi$ and $\omega$ scans                                        | Volume [Å <sup>3</sup> ]                     | 2717.95(4)                                                             |                                                   |
| Radiation (Wavelength [Å])                       | Cu K $\alpha$ ( $\lambda = 1.54184$ )                            | Unit cell dimensions [Å] and [°]             | 10.26960(10)                                                           | 90                                                |
| Crystal size / [mm <sup>3</sup> ]                | 0.252 × 0.143 × 0.098                                            |                                              | 15.03040(10)                                                           | 90                                                |
| Crystal habit                                    | clear colorless block                                            |                                              | 17.60830(10)                                                           | 90                                                |
| Density (calculated) / [g/cm <sup>3</sup> ]      | 1.033                                                            | Absorption coefficient / [mm <sup>-1</sup> ] | 3.592                                                                  |                                                   |
| Abs. correction Tmin                             | 0.465                                                            | Abs. correction Tmax                         | 0.720                                                                  |                                                   |
| Abs. correction type                             | multi-scan                                                       | F(000) [e <sup>-</sup> ]                     | 936.0                                                                  |                                                   |
| Index ranges                                     | -13 ≤ h ≤ 13, -11 ≤ k ≤ 18, -22 ≤ l ≤ 22                         | Theta range for data collection [°]          | 7.734 to 160.12                                                        |                                                   |
| Reflections number                               | 63925                                                            | Data / restraints / parameters               | 5902/0/272                                                             |                                                   |
| Refinement method                                | Least squares                                                    | Final R indices                              | all data                                                               | R <sub>1</sub> = 0.0260, wR <sub>2</sub> = 0.0682 |
| Function minimized                               | $\sum w(F_o^2 - F_c^2)^2$                                        |                                              | >2 $\sigma$ (I)                                                        | R <sub>1</sub> = 0.0258, wR <sub>2</sub> = 0.0680 |
| Goodness-of-fit on F <sup>2</sup>                | 1.070                                                            | Weighting scheme                             | w=1/[ $\sigma^2(F_o^2)+(0.0380P)^2+0.6975P$ ]                          |                                                   |
| Largest diff. peak and hole [e Å <sup>-3</sup> ] | 0.24/-0.31                                                       |                                              | where P=(F <sub>o</sub> <sup>2</sup> +2F <sub>c</sub> <sup>2</sup> )/3 |                                                   |

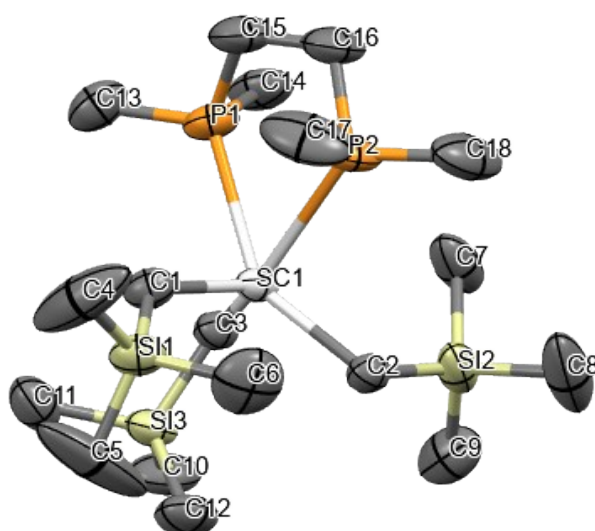

**Fig. S40** Molecular structure of Sc-DMPE with thermal ellipsoids at 50% probability with hydrogen atoms are omitted for the clarity. Sc: grey, C: grey, Si: yellow, P: orange.

**Table S10.** Sample and crystal data of Sc-DMPE

|                                                  |                                                                  |                                              |                                                                        |                                                   |
|--------------------------------------------------|------------------------------------------------------------------|----------------------------------------------|------------------------------------------------------------------------|---------------------------------------------------|
| Chemical formula                                 | ScC <sub>18</sub> H <sub>49</sub> Si <sub>3</sub> P <sub>2</sub> | Crystal system                               | orthorhombic                                                           |                                                   |
| Formula weight [g/mol]                           | 456.74                                                           | Space group                                  | Pna2 <sub>1</sub>                                                      |                                                   |
| Temperature [K]                                  | 100.00(10)                                                       | Z                                            | 1                                                                      |                                                   |
| Measurement method                               | $\phi$ and $\omega$ scans                                        | Volume [Å <sup>3</sup> ]                     | 2933.24(6)                                                             |                                                   |
| Radiation (Wavelength [Å])                       | Cu K $\alpha$ ( $\lambda = 1.54184$ )                            | Unit cell dimensions [Å] and [°]             | 16.9327(2)                                                             | 90                                                |
| Crystal size / [mm <sup>3</sup> ]                | 0.257 × 0.218 × 0.129                                            |                                              | 9.51690(10)                                                            | 90                                                |
| Crystal habit                                    | clear colorless block                                            |                                              | 18.2023(2)                                                             | 90                                                |
| Density (calculated) / [g/cm <sup>3</sup> ]      | 1.034                                                            | Absorption coefficient / [mm <sup>-1</sup> ] | 4.339                                                                  |                                                   |
| Abs. correction Tmin                             | 0.402                                                            | Abs. correction Tmax                         | 0.604                                                                  |                                                   |
| Abs. correction type                             | multi-scan                                                       | F(000) [e <sup>-</sup> ]                     | 1000.0                                                                 |                                                   |
| Index ranges                                     | -21 ≤ h ≤ 21, -12 ≤ k ≤ 12, -23 ≤ l ≤ 21                         | Theta range for data collection [°]          | 9.718 to 160.89                                                        |                                                   |
| Reflections number                               | 62263                                                            | Data / restraints / parameters               | 5912/7/238                                                             |                                                   |
| Refinement method                                | Least squares                                                    | Final R indices                              | all data                                                               | R <sub>1</sub> = 0.0604, wR <sub>2</sub> = 0.1435 |
| Function minimized                               | $\Sigma w(F_o^2 - F_c^2)^2$                                      |                                              | >2 $\sigma$ (I)                                                        | R <sub>1</sub> = 0.0598, wR <sub>2</sub> = 0.1431 |
| Goodness-of-fit on F <sup>2</sup>                | 1.080                                                            | Weighting scheme                             | w=1/[ $\sigma^2(F_o^2)+(0.0459P)^2+4.6572P$ ]                          |                                                   |
| Largest diff. peak and hole [e Å <sup>-3</sup> ] | 0.64/-0.36                                                       |                                              | where P=(F <sub>o</sub> <sup>2</sup> +2F <sub>c</sub> <sup>2</sup> )/3 |                                                   |

## 4. Thermal stability studies

### 4.1. General procedure for thermolysis studies

In an Ar-filled glovebox, a 9.1 mM solution of the corresponding M complex was prepared in C<sub>6</sub>D<sub>6</sub> with hexamethylbenzene as an internal standard, in a YT NMR tube. The NMR sample was incubated at 30°C in an oil bath with a thermocouple. The thermolysis process was monitored by <sup>1</sup>H NMR spectroscopy for at least two half-lives.

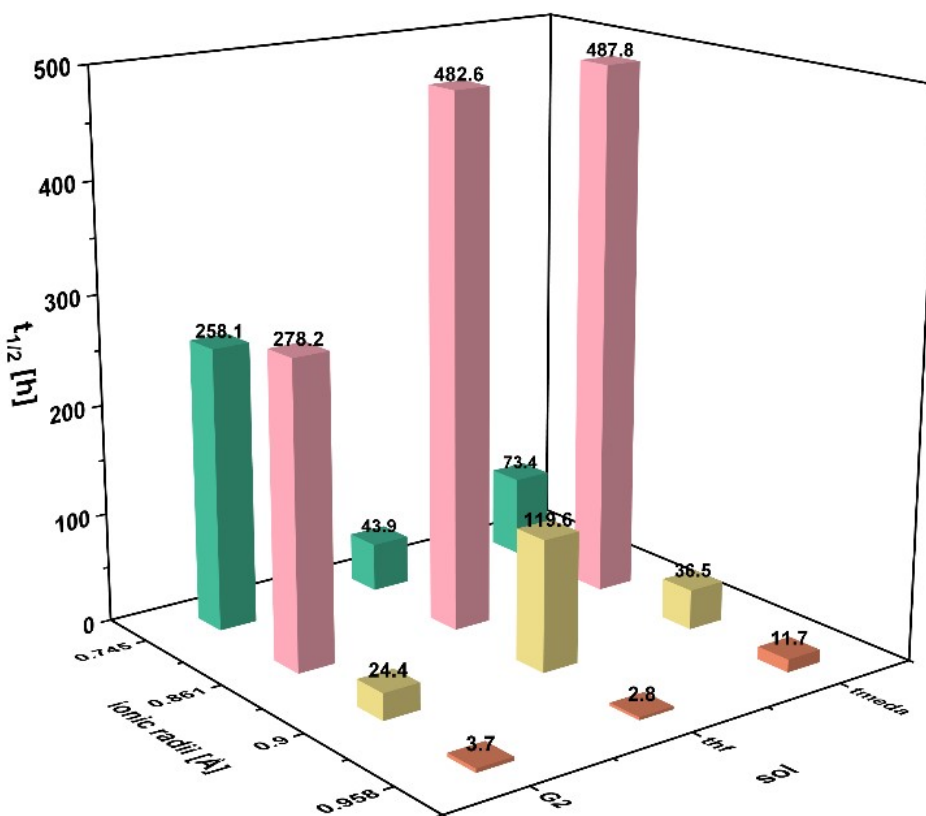

**Figure S 41** Thermal stability, defined as half-life of a solution of M(r)<sub>3</sub>(donor) (**M-donor**) in benzene solution, for a range of rare earth neosilyl organized in increasing metal ionic radius, Sc (green), Lu (pink), Y (yellow), Sm (rust), and coordinated donor ligand(s), donor for donor = (THF)<sub>2</sub>, TMEDA, G<sub>2</sub> = diglyme, (CH<sub>3</sub>(OCH<sub>2</sub>CH<sub>2</sub>)<sub>2</sub>O). Plots with additional data for selected metals are included in the SI.

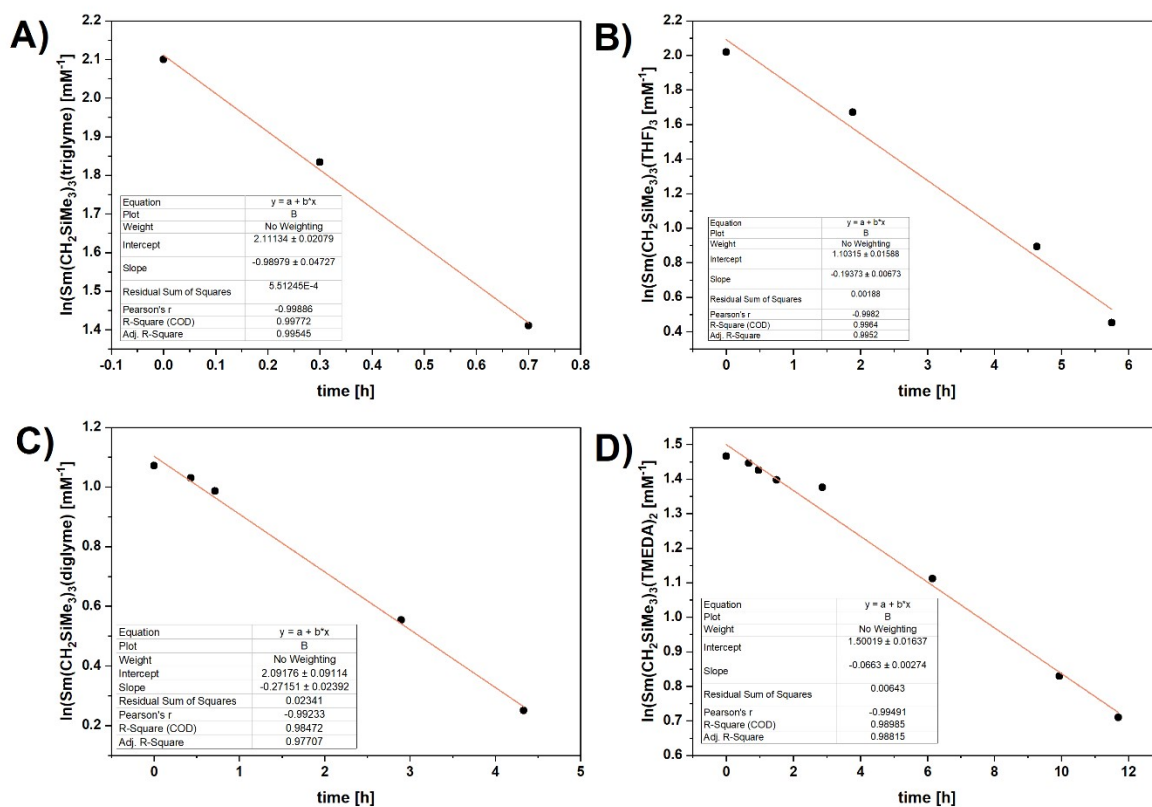

**Figure S 42** Thermal stability of **A) Sm-G<sub>3</sub>**, **B) Sm-THF**, **C) Sm-G<sub>2</sub>**, and **D) Sm-TMEDA** expressed by the decrease of **Sm-donor** concentration as a function of time using the logarithmic **Sm-donor** concentration values obtained from the NMR integration values after incubation in C<sub>6</sub>D<sub>6</sub>, room temperature (30°C).

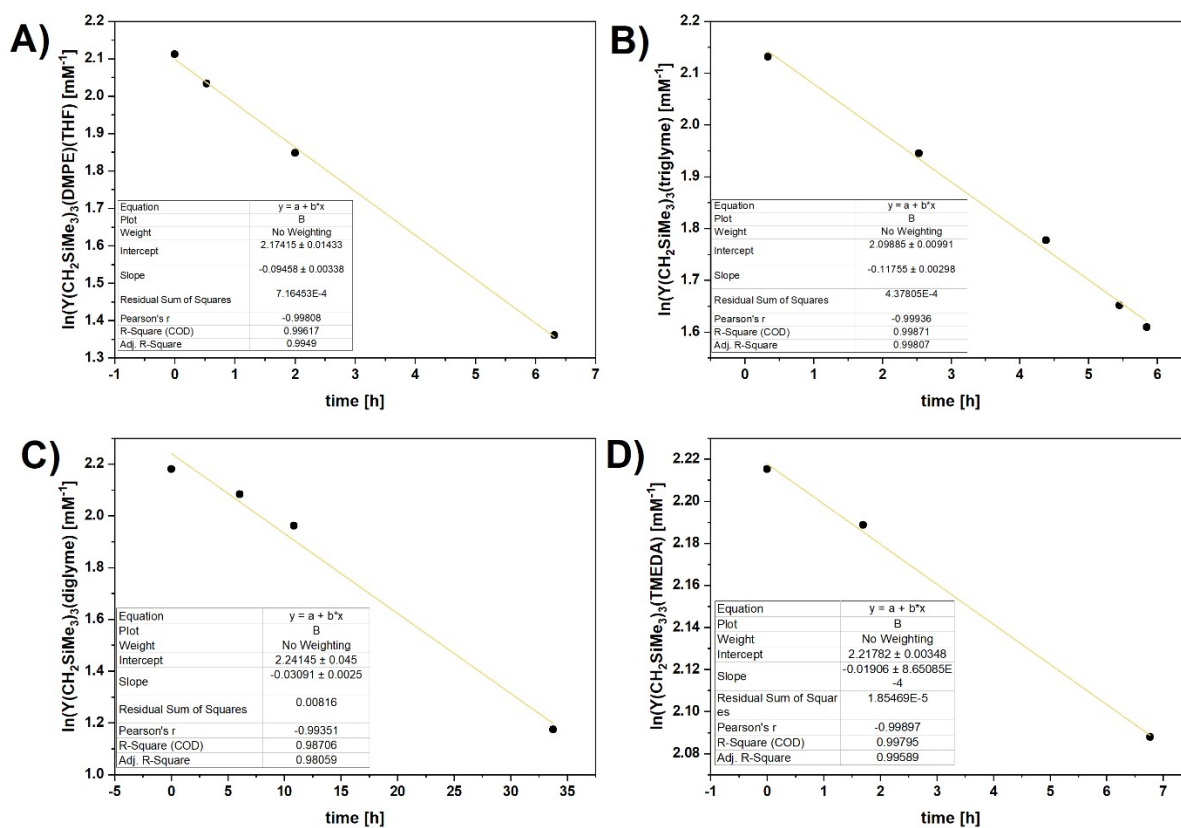

**Figure S 43** Thermalstability of **A) Y-DMPE**, **B) Y-G<sub>3</sub>**, **C) Y-G<sub>2</sub>**, and **D) Y-TMEDA** expressed by the decrease of **Y-donor** concentration as a function of time using the logarithmic **Y-donor** concentration values obtained from the NMR integration values after incubation in C<sub>6</sub>D<sub>6</sub>, room temperature (30°C).

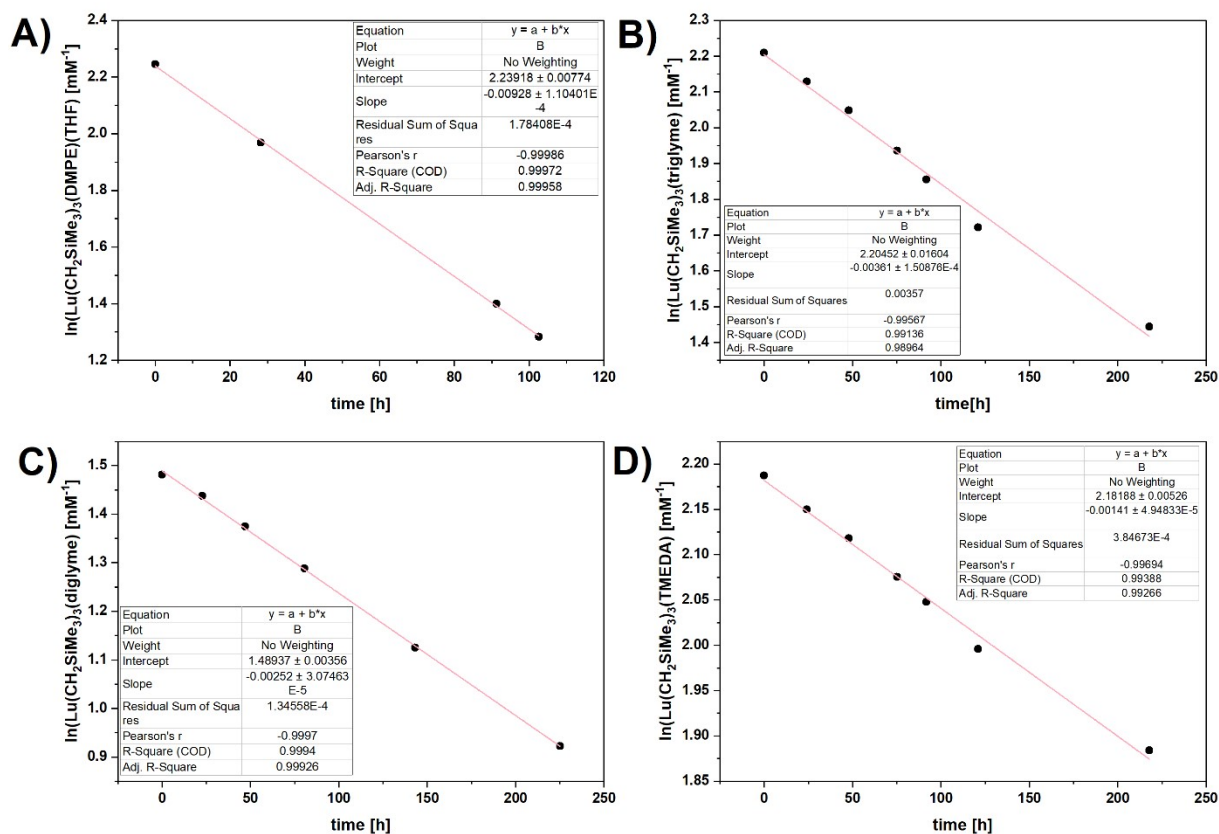

**Figure S 44** Thermalstability of **A) Lu-DMPE**, **B) Lu-G<sub>3</sub>**, **C) Lu-G<sub>2</sub>**, and **D) Lu-TMEDA** expressed by the decrease of **Lu-donor** concentration as a function of time using the logarithmic **Lu-donor** concentration values obtained from the NMR integration values after incubation in C<sub>6</sub>D<sub>6</sub>, room temperature (30°C).



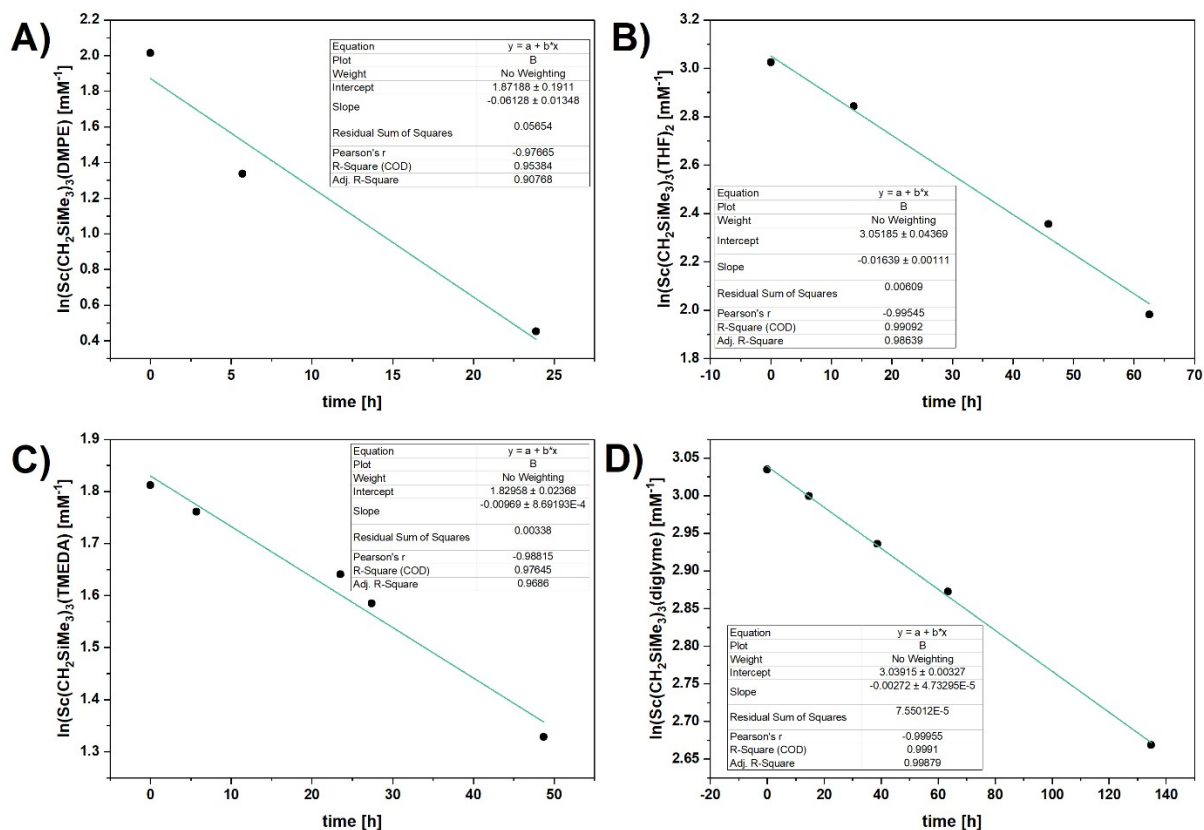

**Figure S 45** Thermal stability of **A) Sc-DMPE**, **B) Sc-THF**, **C) Sc-TMEDA**, and **D) Sc-G<sub>2</sub>** expressed by the decrease of **Sc-donor** concentration as a function of time using the logarithmic **Sc-donor** concentration values obtained from the NMR integration values after incubation in C<sub>6</sub>D<sub>6</sub>, room temperature (30°C).

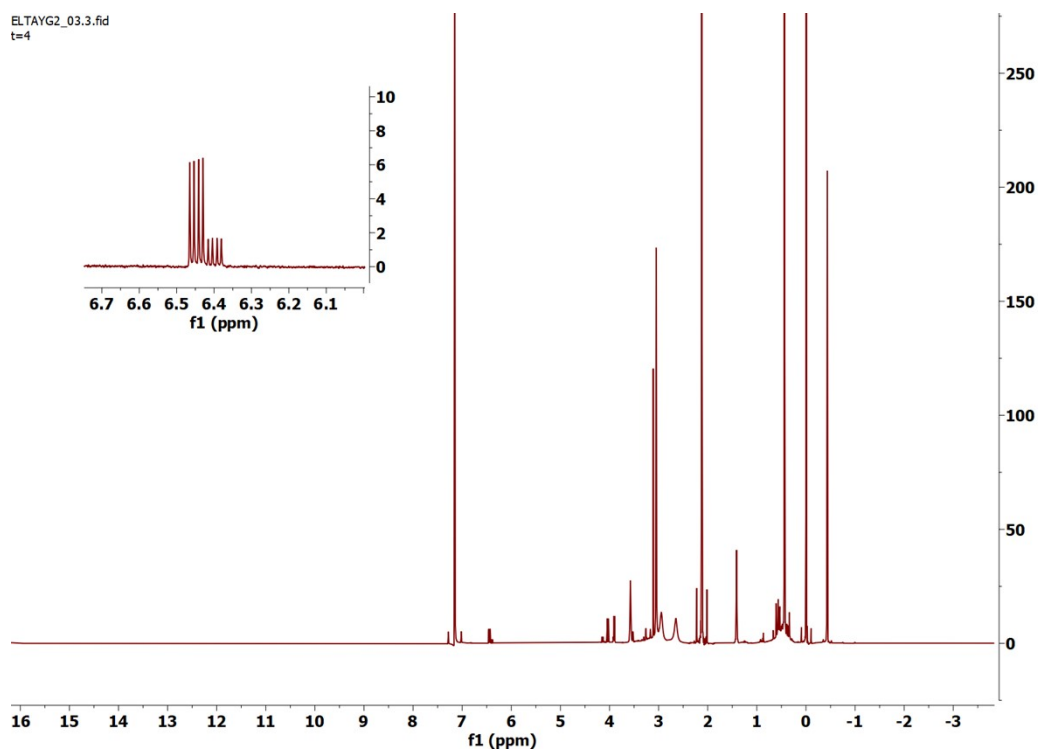

**Figure S 46**  $^1\text{H}$  NMR spectrum (600 MHz) of **Y-G<sub>2</sub>** in  $d_6$ -benzene (t = 33 h) showing increasing resonances that can be assigned to  $\text{CH}_2=\text{CHOME}$  vinyl methyl ether, VME (inset).

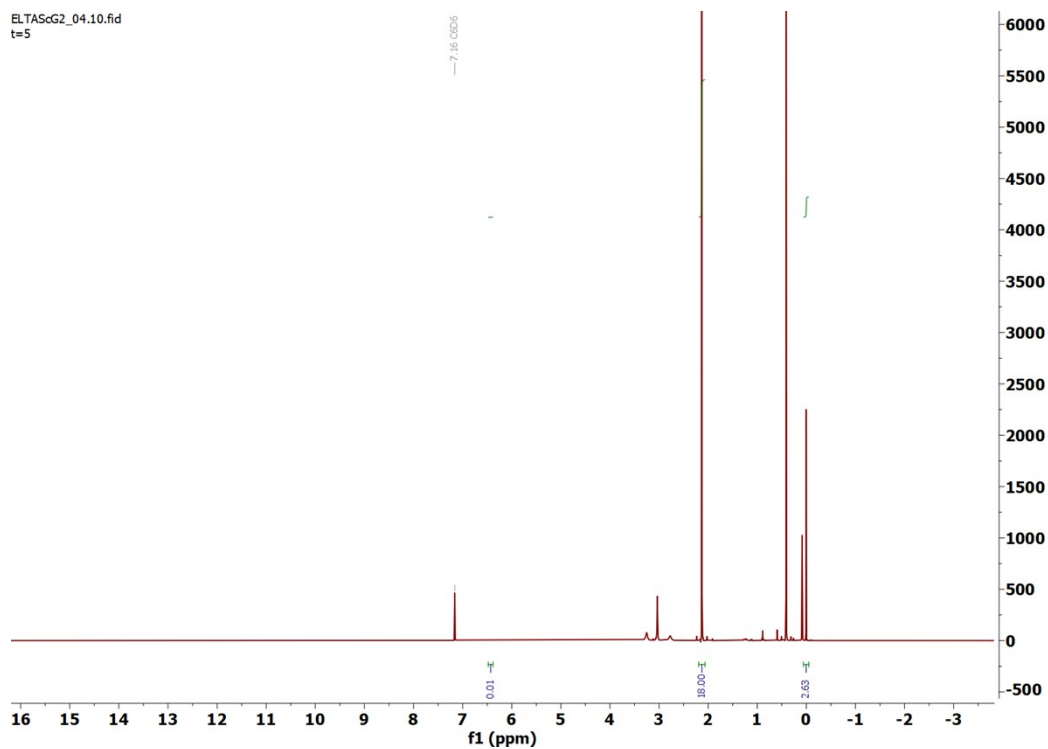

**Figure S 47**  $^1\text{H}$  NMR spectrum (600 MHz) of **Sc-G<sub>2</sub>** in  $d_6$ -benzene (t = 134 h) showing negligible amount of vinyl methyl ether, VME.

## 5. Isotope labelling and speciation studies

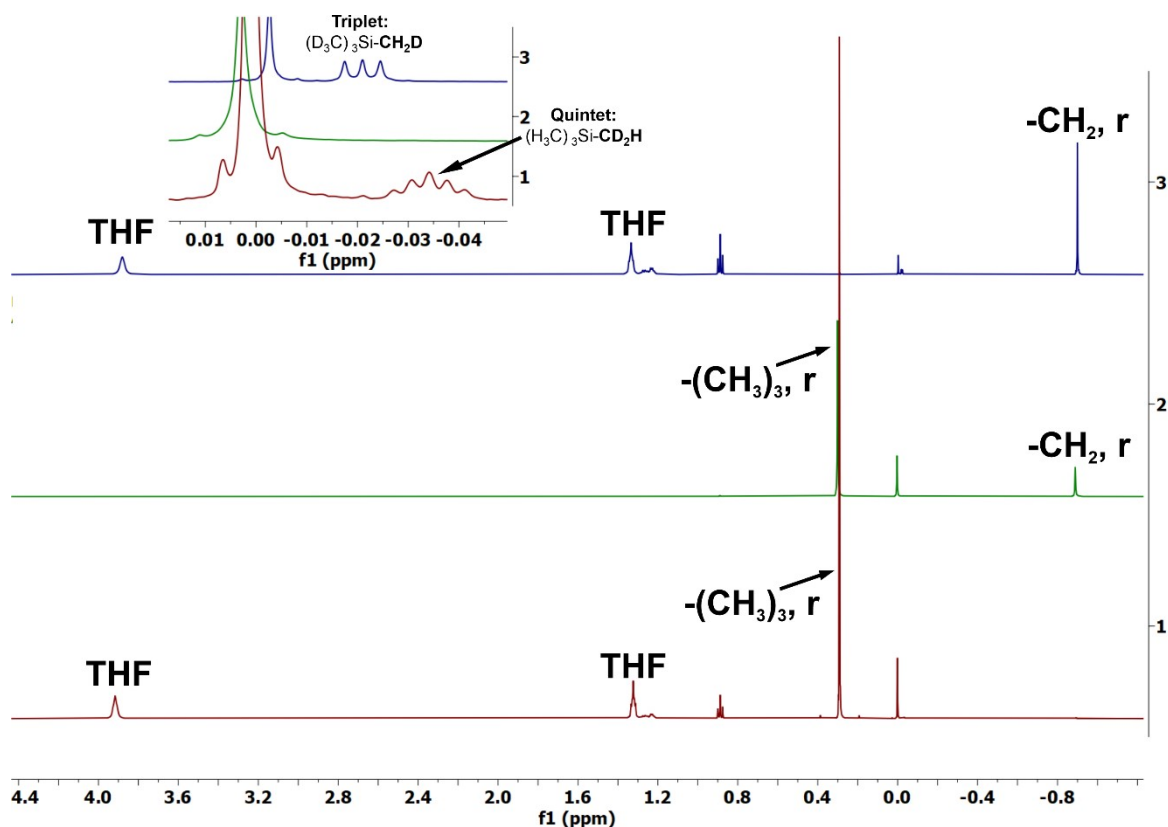

**Figure S 48** Stacked  $^1\text{H}$  NMR spectra (600 MHz) of  $\text{Lu}(\text{d}_2\text{-r})_3(\text{THF})_2$  (red),  $\text{Lu}(\text{r})_3(\text{d}_8\text{-THF})_2$  (green), and  $\text{Lu}(\text{d}_9\text{-r})_3(\text{THF})_2$  (blue) in  $[\text{d}_6]$ -benzene. (9.1 mM,  $30^\circ\text{C}$ ).

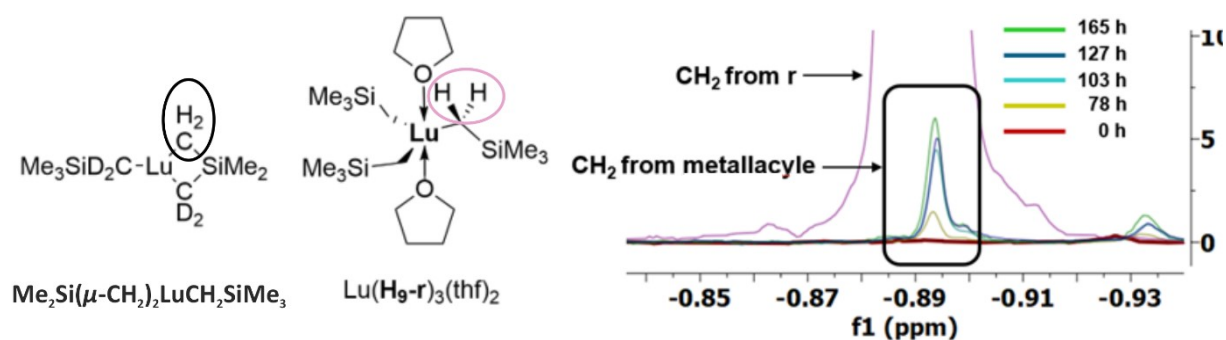

**Figure S 49**  $^1\text{H}$  NMR spectrum shows metallacyclic  $\text{CH}_2$  – resonance (black box and circle) ( $t = 0$  to 165h) growing in overlaps with  $-\text{CH}_2$  resonance from r (lavender).  $30^\circ\text{C}$  in  $[\text{D}_6]$ -benzene.

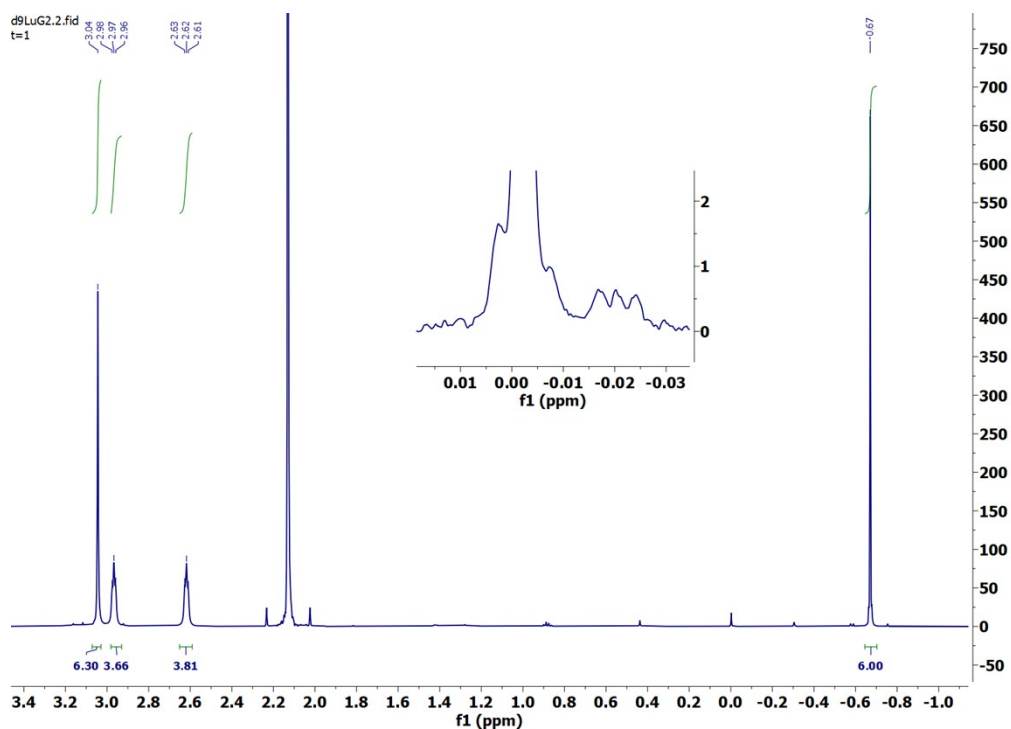

**Figure S 50**  $^1\text{H}$  NMR (600 MHz,  $\text{C}_6\text{D}_6$ ) of  $\text{Lu}(\text{CH}_2\text{Si}(\text{CD}_3)_3)_3(\text{C}_6\text{H}_{14}\text{O}_3)$  showing  $\text{CDH}_2\text{Si}(\text{CD}_3)_3$  as a 1:1:1 triplet at  $\delta$  0.02.  $\delta$  3.04 (s, 6H), 2.97 (t,  $J = 5.4$  Hz, 4H), 2.62 (t,  $J = 5.4$  Hz, 4H), -0.67 (s, 6H).

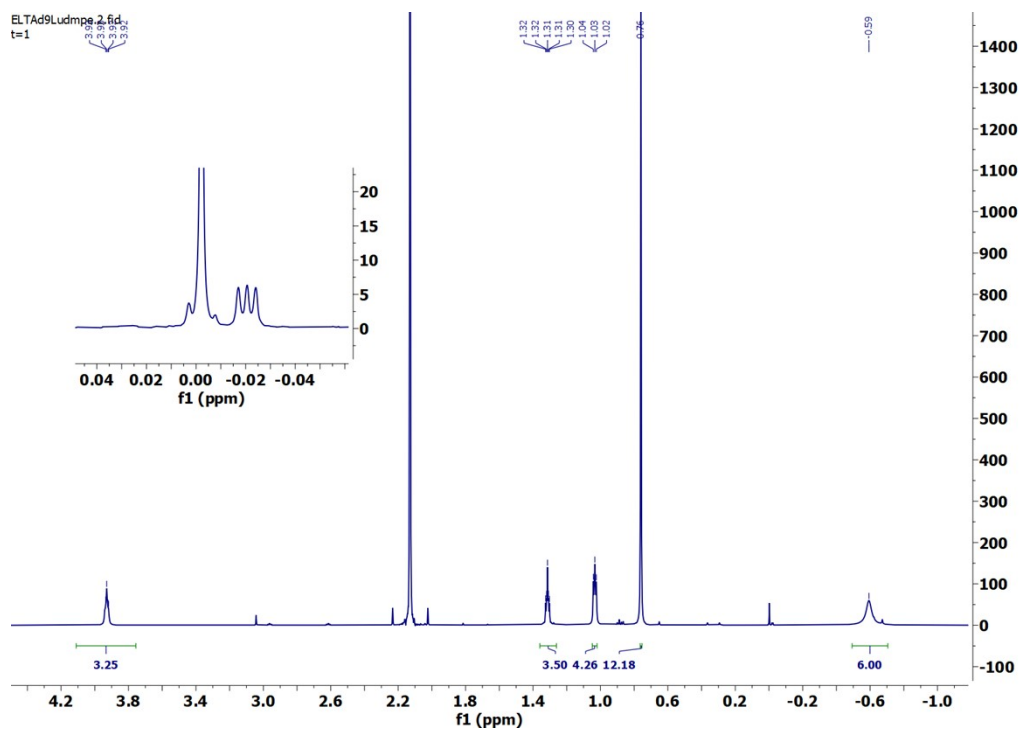

**Figure S 51**  $^1\text{H}$  NMR (600 MHz,  $\text{C}_6\text{D}_6$ ) of  $\text{Lu}(\text{CH}_2\text{Si}(\text{CD}_3)_3)_3(\text{C}_6\text{H}_{16}\text{P}_2)(\text{C}_4\text{H}_8\text{O})$  showing  $\text{CDH}_2\text{Si}(\text{CD}_3)_3$  as a 1:1:1 triplet at  $\delta$  0.02.  $\delta$  4.03 – 3.79 (m, 4H), 1.37 – 1.27 (m, 4H), 1.03 (t,  $J = 5.2$  Hz, 4H), 0.76 (s, 12H), -0.59 (s, 6H).

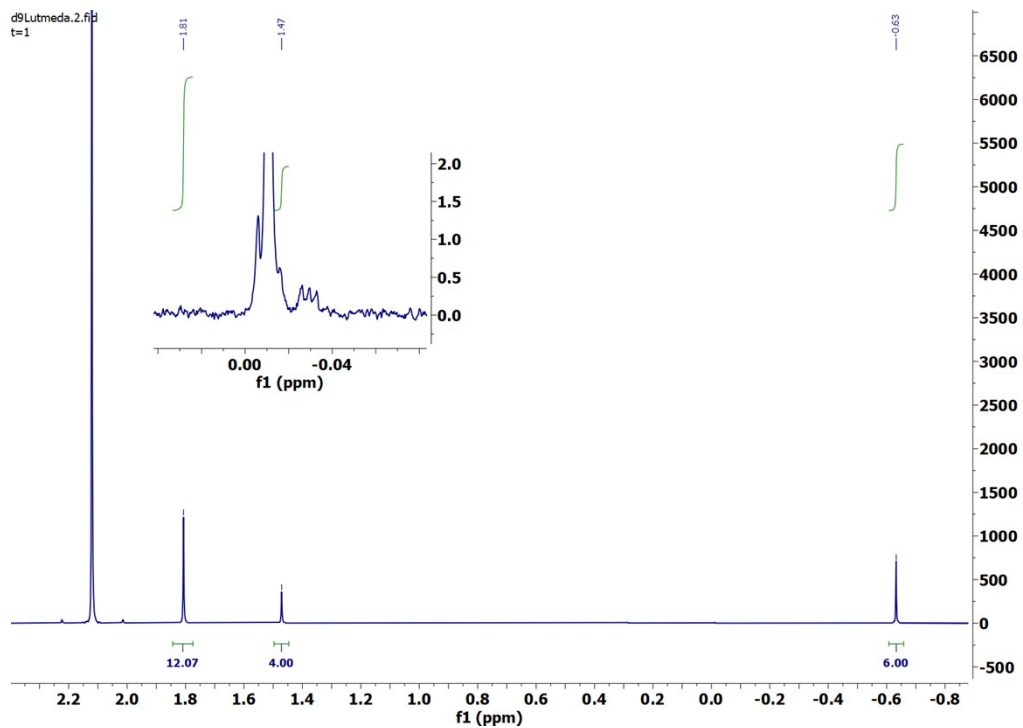

**Figure S 52**  $^1\text{H}$  NMR (600 MHz,  $\text{C}_6\text{D}_6$ ) of  $\text{Lu}(\text{CH}_2\text{Si}(\text{CD}_3)_3)_3(\text{Me}_2\text{NCH}_2\text{CH}_2\text{NMe}_2)$  showing  $\text{CDH}_2\text{Si}(\text{CD}_3)_3$  as a 1:1:1 triplet at  $\delta$  0.02.  $\delta$  1.81 (s, 12H), 1.47 (s, 4H), -0.63 (s, 6H).

### 5.1 Synthesis of Lu(CD<sub>2</sub>SiMe<sub>3</sub>)<sub>3</sub>(C<sub>4</sub>H<sub>8</sub>O)<sub>2</sub> (d<sub>2</sub>-Lu-THF)

In an Ar-filled glovebox, anhydrous LuCl<sub>3</sub> (25 mg, 0.09 mmol) was suspended in 1.5 mL THF. To the resulting colorless solution a solution of d<sub>2</sub>-((trimethylsilyl)methyl)lithium (LiCD<sub>2</sub>Si(CH<sub>3</sub>)<sub>3</sub>) (25.7 mg, 0.27 mmol, 3 eq.) in 250 μL THF was added dropwise. The colorless reaction mixture was stirred at room temperature for 40 min. The solvent was removed under reduced pressure followed by extraction with hexane (3 × 2 mL). The filtered extracts were combined and the solvent was removed under reduced pressure yielding the title compound Lu(CD<sub>2</sub>SiMe<sub>3</sub>)<sub>3</sub>(C<sub>4</sub>H<sub>8</sub>O)<sub>2</sub> as a white solid. Yield: 26 mg, 49% based on LuCl<sub>3</sub>.

<sup>1</sup>H NMR (600 MHz, C<sub>6</sub>D<sub>6</sub>) δ 3.97 - 3.94(s, 8H), 1.31 – 1.28 (m, 8H), 0.29 (s, 27H). <sup>2</sup>H NMR (92 MHz, C<sub>6</sub>D<sub>6</sub>) δ -0.94 (s, 6H). <sup>13</sup>C NMR (151 MHz, C<sub>6</sub>D<sub>6</sub>) δ 71.01, 40.79, 25.06, 4.77.

### 5.2. Synthesis of Lu(CH<sub>2</sub>Si(CD<sub>3</sub>)<sub>3</sub>)<sub>3</sub>(C<sub>4</sub>H<sub>8</sub>O)<sub>2</sub> (d<sub>9</sub>-Lu-THF)

In an Ar-filled glovebox, anhydrous LuCl<sub>3</sub> (25 mg, 0.09 mmol) was suspended in 1.5 mL THF. To the resulting colorless solution a solution of d<sub>9</sub>-((trimethylsilyl)methyl)lithium (LiCH<sub>2</sub>Si(CD<sub>3</sub>)<sub>3</sub>) synthesized according to a previously reported procedure<sup>9</sup> (25.7 mg, 0.27 mmol, 3 eq.) in 250 μL THF was added dropwise. The colorless reaction mixture was stirred at room temperature for 40 min. The solvent was removed under reduced pressure followed by extraction with hexane (3 × 2 mL). The filtered extracts were combined and the solvent was removed under reduced pressure yielding the title compound Lu(CH<sub>2</sub>Si(CD<sub>3</sub>)<sub>3</sub>)<sub>3</sub>(C<sub>4</sub>H<sub>8</sub>O)<sub>2</sub> as a white solid. Yield: 21 mg, 45% based on LuCl<sub>3</sub>.

<sup>1</sup>H NMR (600 MHz, C<sub>6</sub>D<sub>6</sub>) δ 3.98 - 3.95 (s, 8H), 1.32 – 1.29 (m, 8H), δ -0.89 (s, 6H). <sup>2</sup>H NMR (92 MHz, C<sub>6</sub>D<sub>6</sub>) δ 0.27 (s, 27H). <sup>13</sup>C NMR (151 MHz, C<sub>6</sub>D<sub>6</sub>) δ 71.01, 41.79, 25.07, 3.73.

### 5.3. Synthesis of Lu(CH<sub>2</sub>Si(CD<sub>3</sub>)<sub>3</sub>)<sub>3</sub>(C<sub>6</sub>H<sub>14</sub>O<sub>3</sub>) (d<sub>9</sub>-Lu-G<sub>2</sub>)

In an Ar-filled glovebox, Lu(CH<sub>2</sub>Si(CD<sub>3</sub>)<sub>3</sub>)<sub>3</sub>(C<sub>4</sub>H<sub>8</sub>O)<sub>2</sub> (10.05 mg, 0.017 mmol) was dissolved in 1.5 mL hexane. The colorless solution was cooled down to -78°C followed by addition of diglyme ((CH<sub>3</sub>OCH<sub>2</sub>CH<sub>2</sub>)<sub>2</sub>O, G<sub>2</sub>) (9.9 mg, 0.132 mmol, 8 eq.) resulting in white precipitates which were extracted with hexane (3 × 1 mL). The combined hexanes extracts were concentrated under reduced pressure and cooled down to -40°C offering Lu(CH<sub>2</sub>Si(CD<sub>3</sub>)<sub>3</sub>)<sub>3</sub>(C<sub>6</sub>H<sub>14</sub>O<sub>3</sub>) (d<sub>9</sub>-Lu-G<sub>2</sub>) as a white solid. Yield: 4.2 mg, 41%, based on Lu(CH<sub>2</sub>Si(CD<sub>3</sub>)<sub>3</sub>)<sub>3</sub>(C<sub>4</sub>H<sub>8</sub>O)<sub>2</sub>.

<sup>1</sup>H NMR (600 MHz, C<sub>6</sub>D<sub>6</sub>) δ 3.04 (s, 6H), 2.97 (t, J = 5.4 Hz, 4H), 2.62 (t, J = 5.4 Hz, 4H), -0.67 (s, 6H).

### 5.4. Synthesis of Lu(CH<sub>2</sub>Si(CD<sub>3</sub>)<sub>3</sub>)<sub>3</sub>(C<sub>6</sub>H<sub>16</sub>P<sub>2</sub>)(C<sub>4</sub>H<sub>8</sub>O) (d<sub>9</sub>-Lu-DMPE)

In an Ar-filled glovebox, Lu(CH<sub>2</sub>Si(CD<sub>3</sub>)<sub>3</sub>)<sub>3</sub>(C<sub>4</sub>H<sub>8</sub>O)<sub>2</sub> (20 mg, 0.033 mmol) was dissolved in 1.6 mL toluene and cooled to -40°C in the glovebox freezer. To the resulting cold clear yellow solution 1,2-Bis(dimethylphosphino)ethane (C<sub>6</sub>H<sub>16</sub>P<sub>2</sub>, DMPE) (4.9 mg, 0.033 mmol, 1 eq.) in 1 mL toluene was added dropwise. The resulting clear colorless mixture was stirred for 1h at room temperature. Toluene was removed under reduced pressure at room temperature resulting in a white solid that was recrystallized from a 1:1 Et<sub>2</sub>O/hexane mixture to yield Lu(CH<sub>2</sub>Si(CD<sub>3</sub>)<sub>3</sub>)<sub>3</sub>(C<sub>6</sub>H<sub>16</sub>P<sub>2</sub>)(C<sub>4</sub>H<sub>8</sub>O) as a white crystalline solid. Yield: 12.5 mg, 55% based on Lu(CH<sub>2</sub>SiMe<sub>3</sub>)<sub>3</sub>(C<sub>4</sub>H<sub>8</sub>O)<sub>2</sub>.

<sup>1</sup>H NMR (600 MHz, C<sub>6</sub>D<sub>6</sub>) δ 4.03 – 3.79 (m, 4H), 1.37 – 1.27 (m, 4H), 1.03 (t, J = 5.2 Hz, 4H), 0.76 (s, 12H), -0.59 (s, 6H).

### 5.5. Synthesis of Lu(CH<sub>2</sub>Si(CD<sub>3</sub>)<sub>3</sub>)<sub>3</sub>(Me<sub>2</sub>NCH<sub>2</sub>CH<sub>2</sub>NMe<sub>2</sub>) (d<sub>9</sub>-Lu-TMEDA)

In an Ar-filled glovebox, Lu(CH<sub>2</sub>Si(CD<sub>3</sub>)<sub>3</sub>)<sub>3</sub>(C<sub>4</sub>H<sub>8</sub>O)<sub>2</sub> (20 mg, 0.033 mmol) were dissolved in 1.6 mL toluene and cooled to -40°C in the glovebox freezer. To the cold clear yellow solution TMEDA (3.8 mg, 0.033 mmol, 1 eq.) in 1 mL toluene was added dropwise. Toluene was removed under reduced pressure at room temperature resulting in a white solid that was recrystallized from a 1:1 Et<sub>2</sub>O/hexane mixture to

yield  $\text{Lu}(\text{CH}_2\text{Si}(\text{CD}_3)_3)_3(\text{Me}_2\text{NCH}_2\text{CH}_2\text{NMe}_2)$  as a white solid in 18% yield, 3.5 mg based on  $\text{Lu}(\text{CH}_2\text{Si}(\text{CD}_3)_3)_3(\text{C}_4\text{H}_8\text{O})_2$ .

$^1\text{H}$  NMR (600 MHz,  $\text{C}_6\text{D}_6$ )  $\delta$  1.81 (s, 12H), 1.47 (s, 4H), -0.63 (s, 6H).

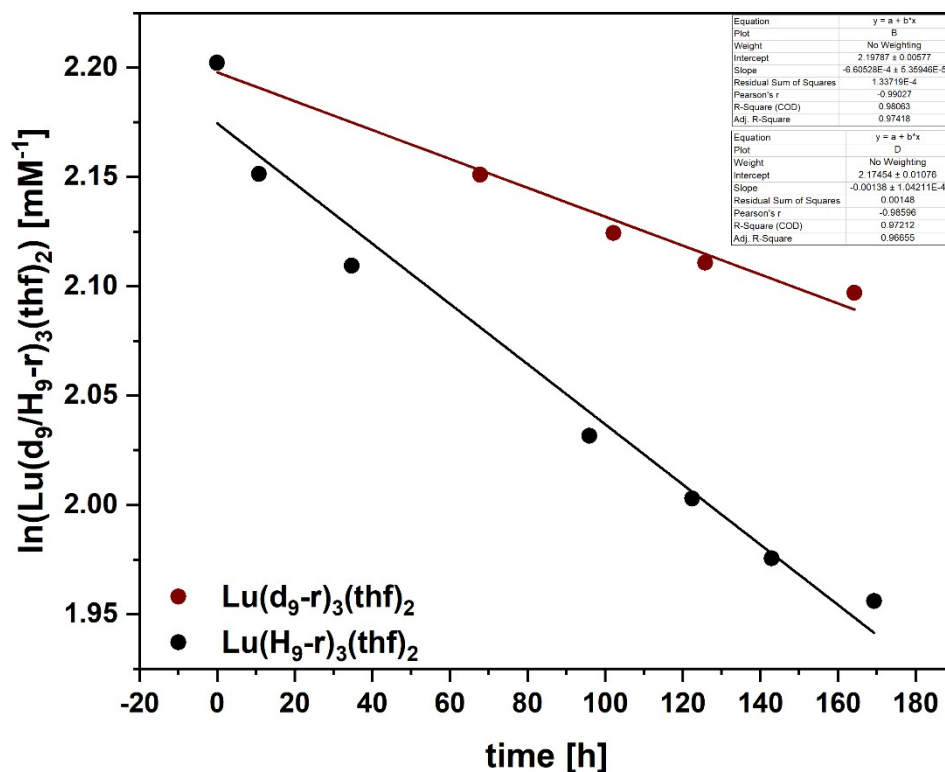

**Figure S 53** Thermal stability of  $\text{Lu}(\text{CH}_2\text{Si}(\text{CD}_3)_3)_3(\text{THF})_2$  ( $\text{Lu}(\text{H}_9\text{-r})_3(\text{THF})_2$ ) and  $\text{Lu}(\text{CH}_2\text{SiMe}_3)_3(\text{THF})_2$  ( $\text{Lu}(\text{H}_9\text{-r})_3(\text{THF})_2$ ) expressed by the decrease of  $\text{Lu}(\text{r})_3(\text{THF})_2$  concentration as a function of time using the logarithmic  $\text{Lu}(\text{r})_3(\text{THF})_2$  concentration values obtained from the NMR integration values after incubation in  $\text{C}_6\text{D}_6$ , room temperature ( $30^\circ\text{C}$ ). The functions are described by the linear fits ( $R^2 = 0.98$ ):  $\ln([\text{Lu}(\text{d}_9\text{-r})_3(\text{THF})_2]) = -6.61 (\pm 0.5) \times 10^{-4} x + 2.2$  and ( $R^2 = 0.97$ ):  $\ln([\text{Lu}(\text{H}_9\text{-r})_3(\text{THF})_2]) = -13.8 (\pm 1.0) \times 10^{-4} x + 2.17$ , respectively, with  $x$  being the incubation time in h. The slope of the linear fit gives the rate constants  $k_D = -6.61 (\pm 0.5) \times 10^{-4} \text{ h}$  and  $k_H = -13.8 (\pm 1.0) \times 10^{-4}$  and a primary KIE  $k_H/k_D = 2.09$ .

## 5.6. General procedure for alkyl crossover studies

In an Ar-filled glovebox, 18.2 mM solutions of  $\text{Li}[\text{YCl}(\text{CD}_2\text{SiMe}_3)_3(\text{THF})_2]$  and  $\text{Li}[\text{YCl}(\text{CH}_2\text{Si}(\text{CD}_3)_3(\text{THF})_2)]$  in  $\text{C}_6\text{D}_6$  (310  $\mu\text{L}$  per sample) were prepared. 300  $\mu\text{L}$  per sample were combined in a YT NMR tube to yield a 600  $\mu\text{L}$  solution containing 9.1 mM of equimolar  $\text{Li}[\text{YCl}(\text{CD}_2\text{SiMe}_3)_3(\text{THF})_2]$  and  $\text{Li}[\text{YCl}(\text{CH}_2\text{Si}(\text{CD}_3)_3(\text{THF})_2)]$ , respectively. The NMR sample was incubated at 30°C in an oil bath with a thermocouple. The thermolysis process was monitored by  $^1\text{H}$  NMR spectroscopy.

**Intermolecular:**

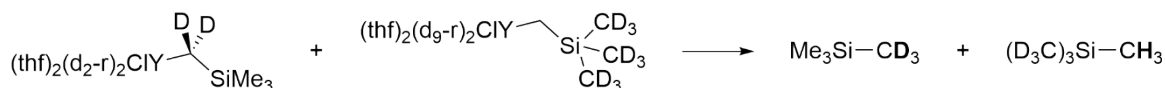

**Intramolecular:**

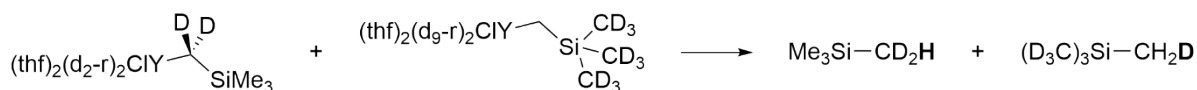

**Scheme S1.** Schematic representation of crossover reaction featuring of  $\text{Li}[\text{YCl}(\text{d}_2\text{-r})_3(\text{THF})_2]$  and  $\text{Li}[\text{YCl}(\text{d}_9\text{-r})_3(\text{THF})_2]$  and the corresponding crossover products according to inter- or intramolecular decomposition.

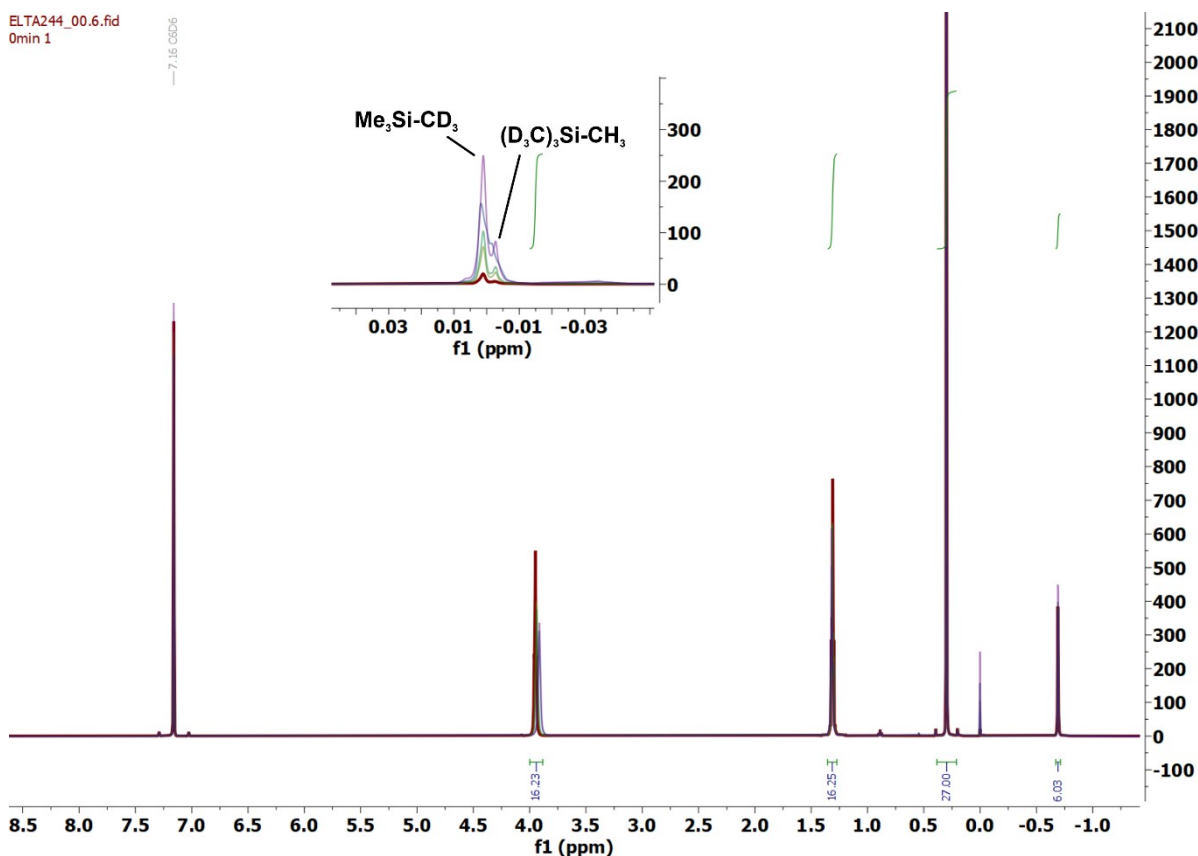

**Figure S 54** Superimposed  $^1\text{H}$  NMR spectra (600 MHz) of an equimolar reaction mixture containing  $\text{Li}[\text{YCl}(\text{d}_2\text{-r})_3(\text{THF})_2]$  and  $\text{Li}[\text{YCl}(\text{d}_9\text{-r})_3(\text{THF})_2]$  in  $\text{C}_6\text{D}_6$  (30°C) recorded at  $t = 0$  min (red), 185 min (yellow), 354 min (teal), 1425 min (lavender), 1627 min (purple). The inset shows singlet resonances at  $\delta = 0.001$  ppm and  $\delta = -0.002$  ppm, respectively, which can be assigned to the crossover products  $\text{d}_3\text{-TMS}$  and  $\text{d}_9\text{-TMS}$  of the intermolecular decomposition process. The different TMS shifts are a result of isotopic effect.<sup>10</sup>



## 6. Impact of LiCl on thermal stability of $M(r)_3(THF)_2$ $M = Y, Lu$

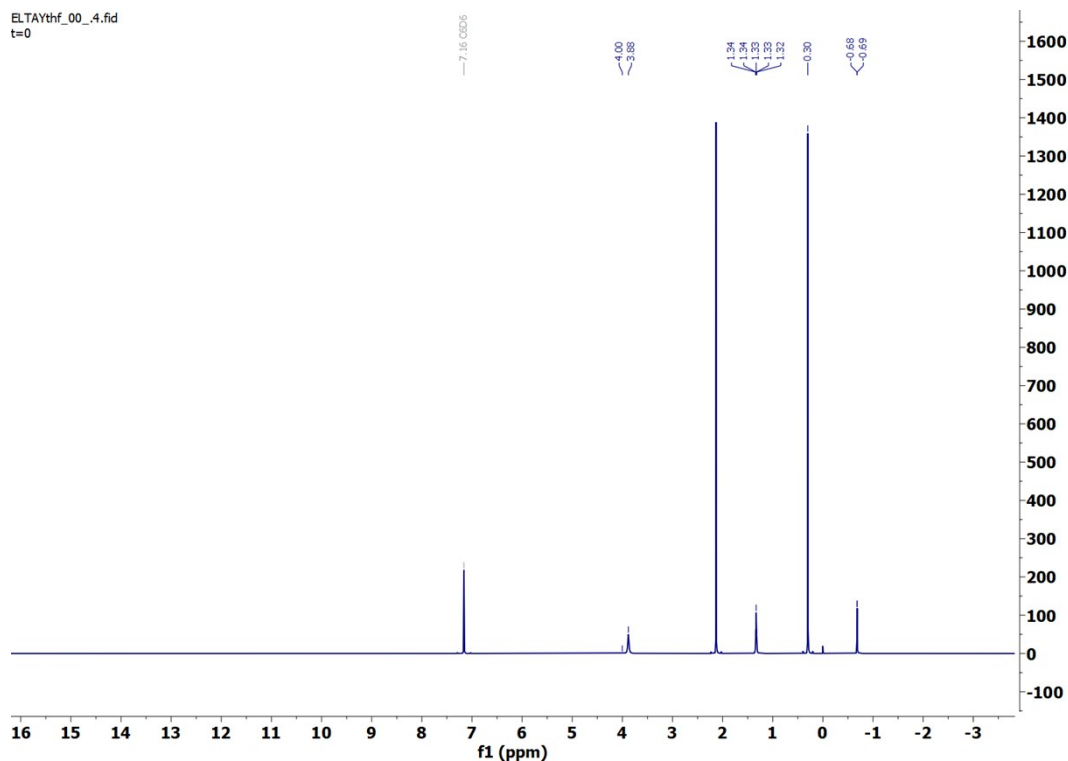

**Figure S 55**  $^1H$  NMR spectrum (600 MHz) of **Y-THF** prepared starting from Nar (this work) in  $d_6$ -benzene.

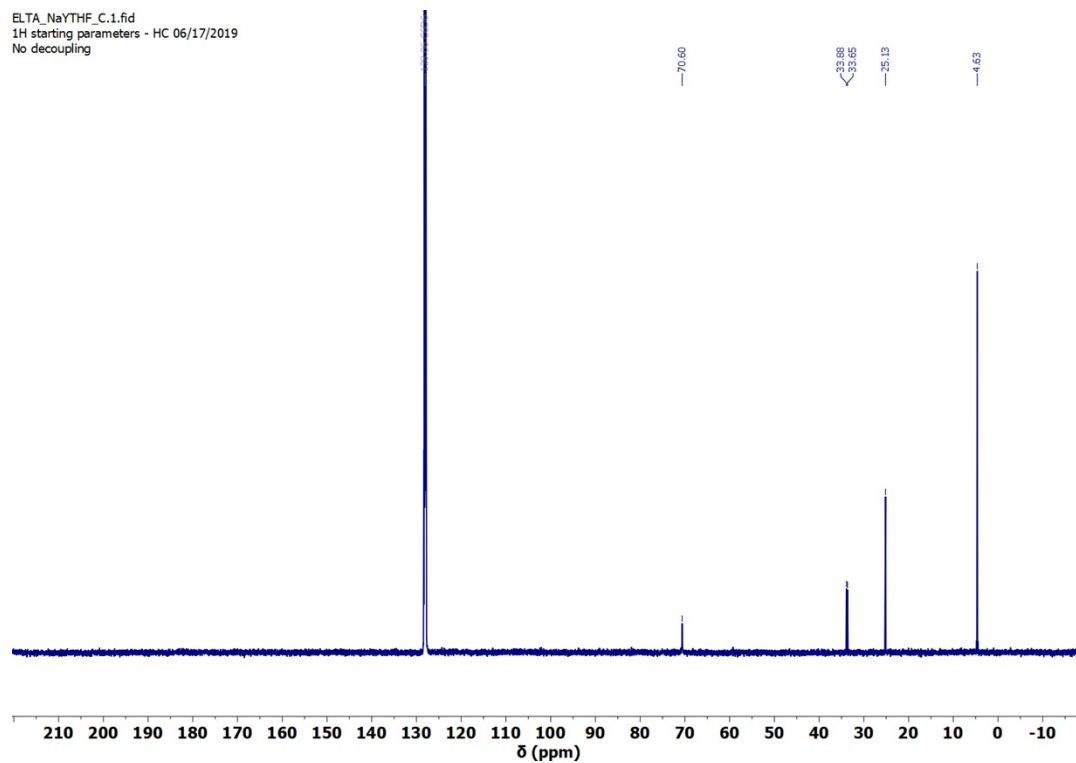

**Figure S 56**  $^{13}C$  NMR (151 MHz,  $C_6D_6$ ) of **Y-THF** in  $d_6$ -benzene.

## 6.1 General procedure for speciation studies

In an Ar-filled glovebox, 18.2 mM stock solutions of  $\text{Lu}(\text{CH}_2\text{SiMe}_3)_3(\text{THF})_2$  or  $\text{Li}[\text{YCl}(\text{CH}_2\text{SiMe}_3)_3(\text{THF})_2]$  (synthesized according to previously published procedures<sup>2, 11, 12</sup>) and 12-crown-4 ether ( $\text{C}_8\text{H}_{16}\text{O}_4$ ) were prepared in  $\text{C}_6\text{D}_6$ . 300  $\mu\text{L}$  of the 12-crown-4 ether ( $\text{C}_8\text{H}_{16}\text{O}_4$ ) stock solution was mixed with 300  $\mu\text{L}$  of  $\text{Lu}(\text{CH}_2\text{SiMe}_3)_3(\text{THF})_2$  or  $\text{Li}[\text{YCl}(\text{CH}_2\text{SiMe}_3)_3(\text{THF})_2]$  in J Young teflon-valved equipped NMR tubes to yield equimolar mixtures of the corresponding complex and 12-crown-4 ether.

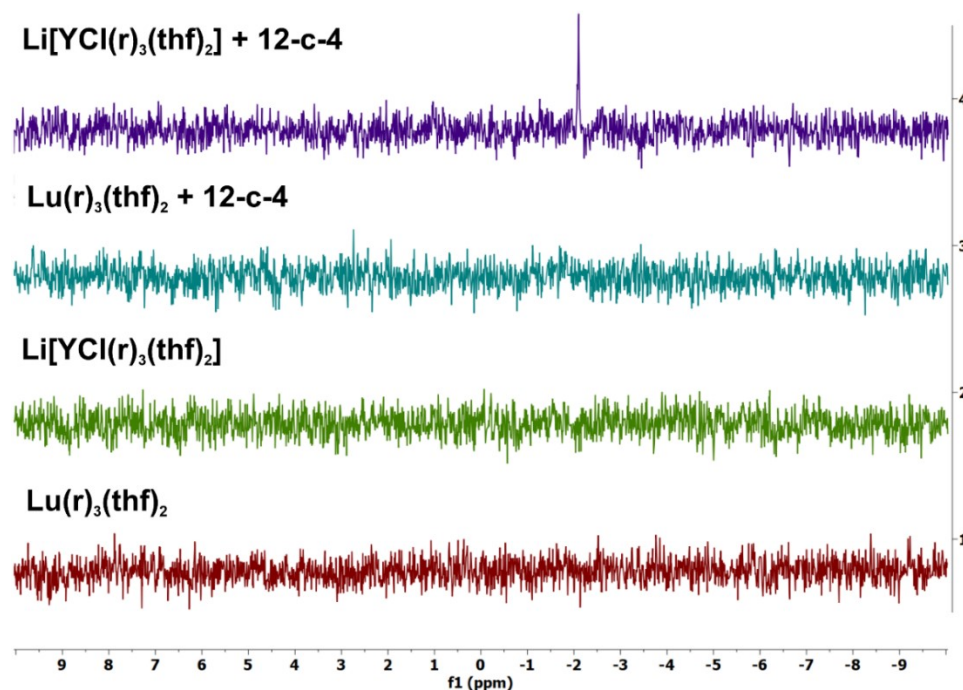

**Figure S 57** Stacked  $^7\text{Li}$  NMR spectra (156 MHz,  $\text{C}_6\text{D}_6$ ) of  $\text{Lu}(\text{CH}_2\text{SiMe}_3)_3(\text{THF})_2$  and  $\text{Li}[\text{YCl}(\text{CH}_2\text{SiMe}_3)_3(\text{THF})_2]$  (prepared according to previously published procedures<sup>2, 11, 12</sup>) in the absence and in the presence of and equimolar amount of 12-crown-4 ether.  $\text{Li}[\text{YCl}(\text{CH}_2\text{SiMe}_3)_3(\text{THF})_2]$  does not show a visible  $^7\text{Li}$  resonance in absence of 12-crown-4 ether which can be attributed to the quadrupolar nature of  $^7\text{Li}$ . Addition of 12-crown-4 ether provides a symmetric coordination environment for  $^7\text{Li}$  which can be observed as a resonance in the  $^7\text{Li}$  NMR spectrum.

**Table S11.** Summary of reports on characterization of  $\text{Y}(\text{CH}_2\text{SiMe}_3)_3(\text{THF})$  synthesized from

| entry | Citation                                              | $^{13}\text{C}\{^1\text{H}\}$ NMR frequency and chemical shifts <sup>a</sup> | $^1\text{H}$ NMR NMR frequency and chemical shifts <sup>b</sup>                                            |
|-------|-------------------------------------------------------|------------------------------------------------------------------------------|------------------------------------------------------------------------------------------------------------|
| 1     | <i>Organometallics</i> <b>2017</b> , 36, 3677         | cites <i>Catal. Sci. Technol.</i> <b>2016</b> , 6 (16), 6339–6353.           |                                                                                                            |
| 2     | <i>Inorg. Chem.</i> <b>2020</b> , 59, 5835            | No NMR resonances reported; reports SXRD + EA                                |                                                                                                            |
| 3     | <i>Organometallic Chem.</i> <b>2018</b> , 875, 5      | cites <b>5</b>                                                               |                                                                                                            |
| 4     | <i>J. Am. Chem. Soc.</i> <b>2001</b> , 123, 7711      | cites <b>9 &amp; 5</b>                                                       |                                                                                                            |
| 5     | <i>J. Chem. Soc., Chem. Commun.</i> <b>1973</b> , 126 | N/A                                                                          | 2.73 (s, 2H), N/A (m, 2H), 0.30 (s, 27H), -0.65 (d, $J = 2.5$ Hz, 1H).                                     |
| 6     | <i>Chem. Commun.</i> <b>2016</b> , 52, 5425           | N/A                                                                          | (400 MHz, toluene- $d_6$ )<br>4.09 (t, $J = 6.4$ Hz, 8H), 1.61-1.33 (m, 8H), 0.18 (s, 27H), -0.38 (s, 6H). |
| 7     | <i>Macromolecules</i> <b>2022</b> , 55, 7488          | N/A                                                                          | (400 MHz)<br>3.95 (t, 8H), 1.31 (t, 8H), 0.29 (s, 27H), -0.69 (s, 6H).                                     |
| 8     | <i>Macromolecules</i> <b>2019</b> , 52, 7073          | (126 MHz)<br>69.8, 33.8, 25.2, 4.5                                           | (400 MHz)<br>4.01 - 3.87 (m, 8H), 1.36 - 1.21 (m, 8H), 0.31 (s, 27H), -0.67 (d, 6H).                       |
| 9     | <i>Organometallics</i> <b>2000</b> , 19, 228          | (101 MHz)<br>70.8, 35.7, 33.7, 25.0, 4.6                                     | (400 MHz)<br>3.93 (s, 9H), 1.30 (m, 10H), 0.27 (s, 27H), -0.71 (d, $J = 2.3$ Hz, 6H).                      |
| 10    | Y-THF + LiCl (1 equiv.)                               | (151 MHz)<br>70.60, 33.88, 33.65, 25.13, 4.63                                | (600 MHz)<br>3.85 (s, 1H), 1.37 - 1.31 (m, 2H), 0.28 (s, 27H), -0.70 (d, $J = 2.8$ Hz, 1H).                |
| 11    | this work (NaY-THF)                                   | (151 MHz)<br>65.90, 33.99, 33.75, 25.15, 4.63                                | (600 MHz)<br>3.87 (s, 9H), 1.35 - 1.31 (m, 10H), 0.30 (s, 27H), -0.68 (d, $J = 2.7$ Hz, 6H).               |

$\text{LiCH}_2\text{SiMe}_3$ . (CSDS & Scifinder August, 28 2024).

- a. all reported as  $\delta$  in  $C_6D_6$  solution. b. all reported as  $\delta$  in  $C_6D_6$  solution except as noted for entries 5 and 6. The H resonances for entry 5 have been converted from  $\tau$  (tau) (in the original report) to  $\delta$  by subtraction from 10; the THF resonances were not reported.

ELTA162\_01.1.fid  
AVQ-400 QNP Proton starting parameters. 12/03/2019 HC

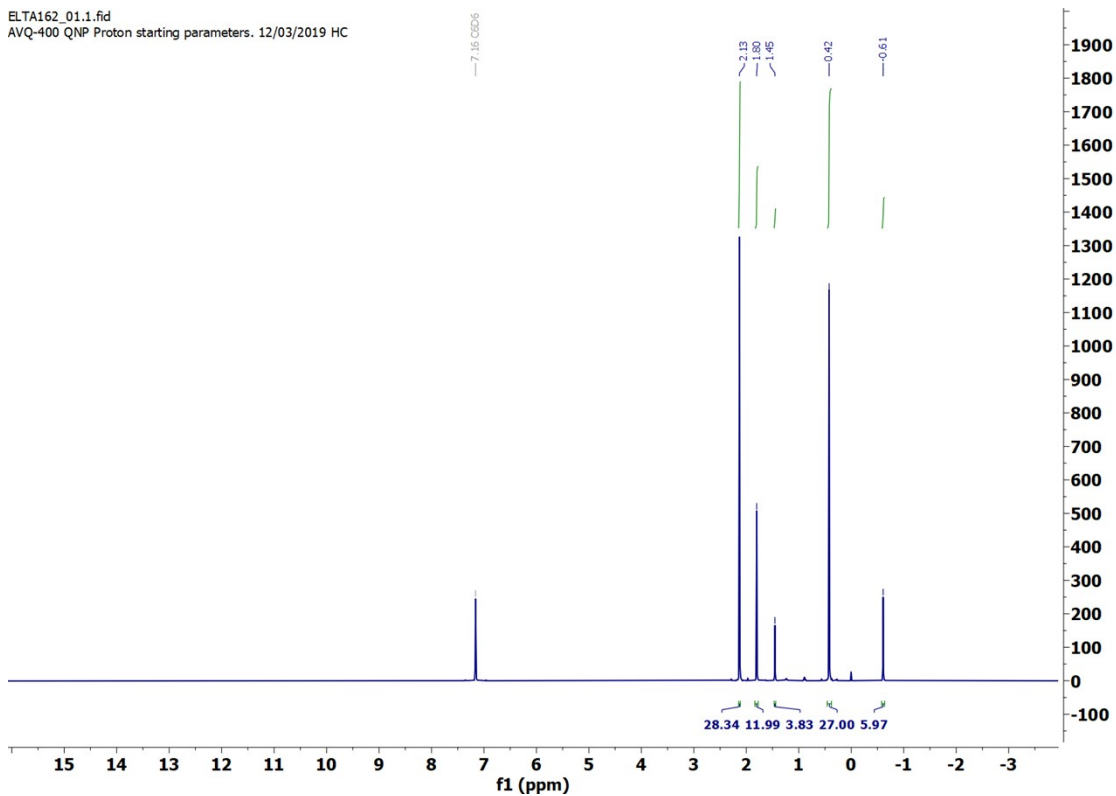

**Figure S 58**  $\text{Li}[\text{YCl}(\text{r})_3(\text{THF})_2]$  in  $\text{C}_6\text{D}_6$  after addition of an equimolar amount of 12-crown-4 ether.  $^1\text{H}$  NMR (400 MHz,  $\text{C}_6\text{D}_6$ ) of  $\delta$  2.13 (s, 28H), 1.80 (s, 12H), 1.45 (s, 4H), 0.42 (s, 27H), -0.61 (s, 6H).

ELTA208\_12c4\_00.2.fid  
1H-13C gHSQC stating parameters - HC 06/17/2019  
ns=2  
td(f1)=128  
expt=10 min

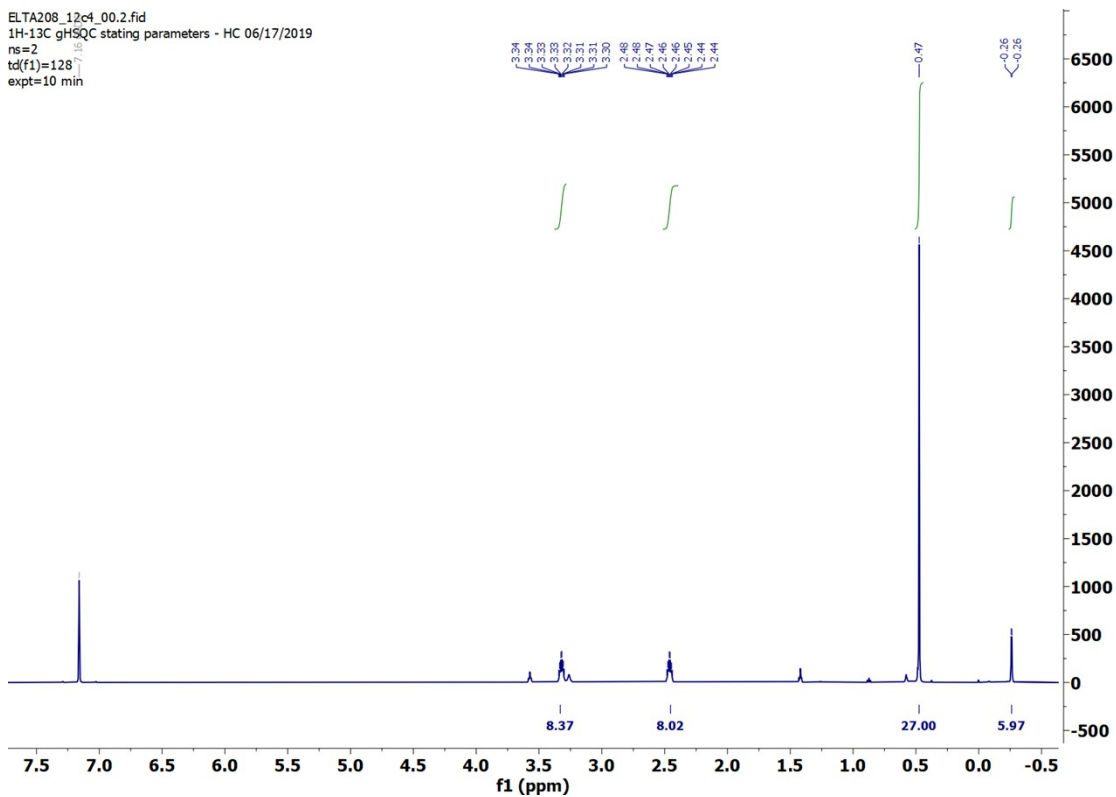

**Figure S 59**  $\text{Y}(\text{r})_3(12\text{-crown-4})$  synthesized according to the literature (Okuda *et al.*)<sup>13</sup>  $^1\text{H}$  NMR (600 MHz,  $\text{C}_6\text{D}_6$ )  $\delta$  3.32 (tt,  $J = 7.1, 3.7$  Hz, 8H), 2.46 (tt,  $J = 6.8, 3.7$  Hz, 8H), 0.47 (s, 27H), -0.26 (d,  $J = 3.2$  Hz, 6H).

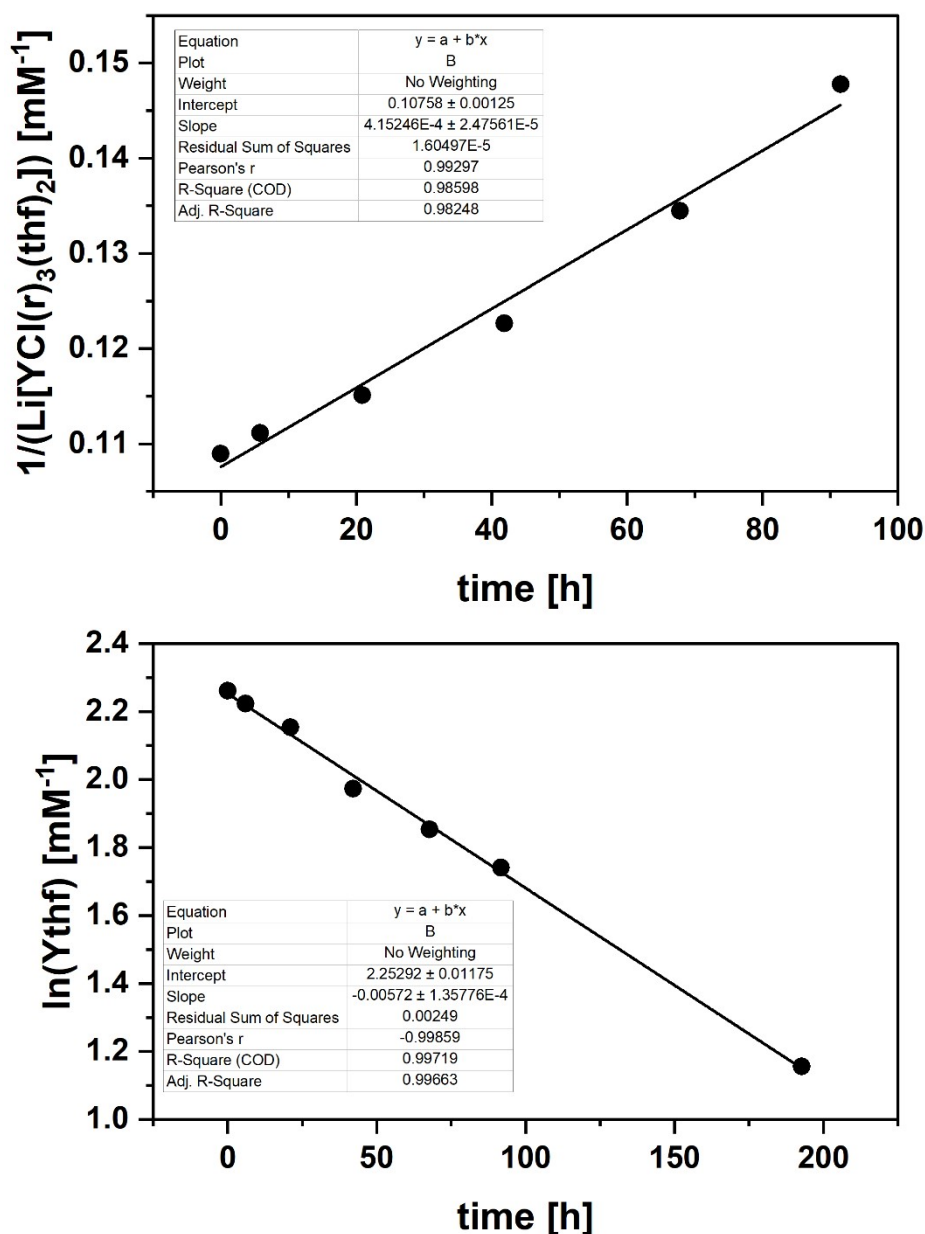

**Figure S 60** Thermalstability of Li[YCl(r)<sub>3</sub>(THF)<sub>2</sub>] (prepared according to previously published procedures<sup>2</sup>, upper figure) and Y(r)<sub>3</sub>(THF)<sub>2</sub> prepared from Nar (this work, bottom figure) expressed by the decrease of **Y-donor** concentration as a function of time using the logarithmic **Y-donor** concentration values obtained from the NMR integration values after incubation in C<sub>6</sub>D<sub>6</sub>, room temperature (30°C).

## 6.2. General procedure for LiCl spiking experiments

In an Ar-filled glovebox, five 4 mL vials were charged with  $\text{Lu}(\text{CH}_2\text{SiMe}_3)_3(\text{THF})_2$  (3.2 mg, 0.006 mmol) and dissolved in varying amounts of THF (833.3  $\mu\text{L}$  to 1 mL). To each stirred THF solution, varying amounts (0  $\mu\text{L}$  to 166.7  $\mu\text{L}$ ) of a 33.3 mM LiCl solution in THF were added to yield 1 mL solutions of  $\text{Lu}(\text{CH}_2\text{SiMe}_3)_3(\text{THF})_2$  with LiCl concentrations ranging from 0% to 100% (0 to 1 equivalent). After stirring the solutions for five minutes at room temperature, the volatiles were removed under reduced pressure, and the residues were redissolved in  $\text{C}_6\text{D}_6$ .

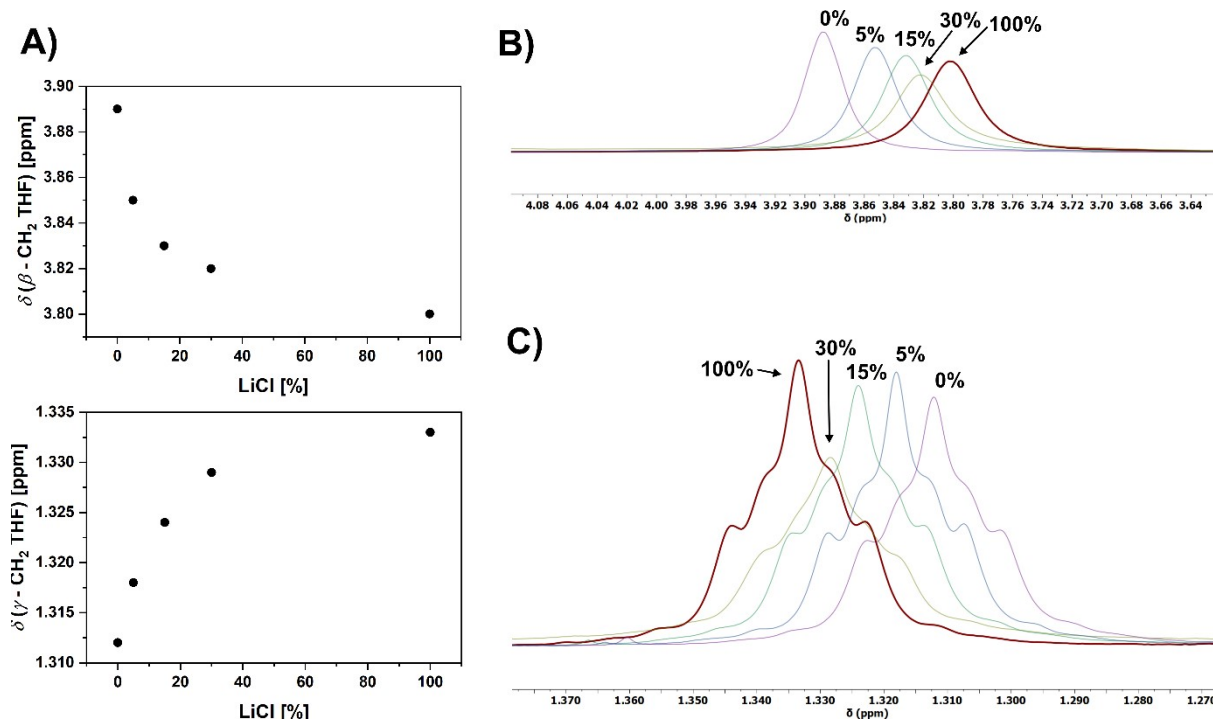

**Figure S 61** Impact of LiCl concentration on the <sup>1</sup>H NMR shifts of the  $\beta$ - &  $\gamma$ -CH<sub>2</sub> resonances in THF.

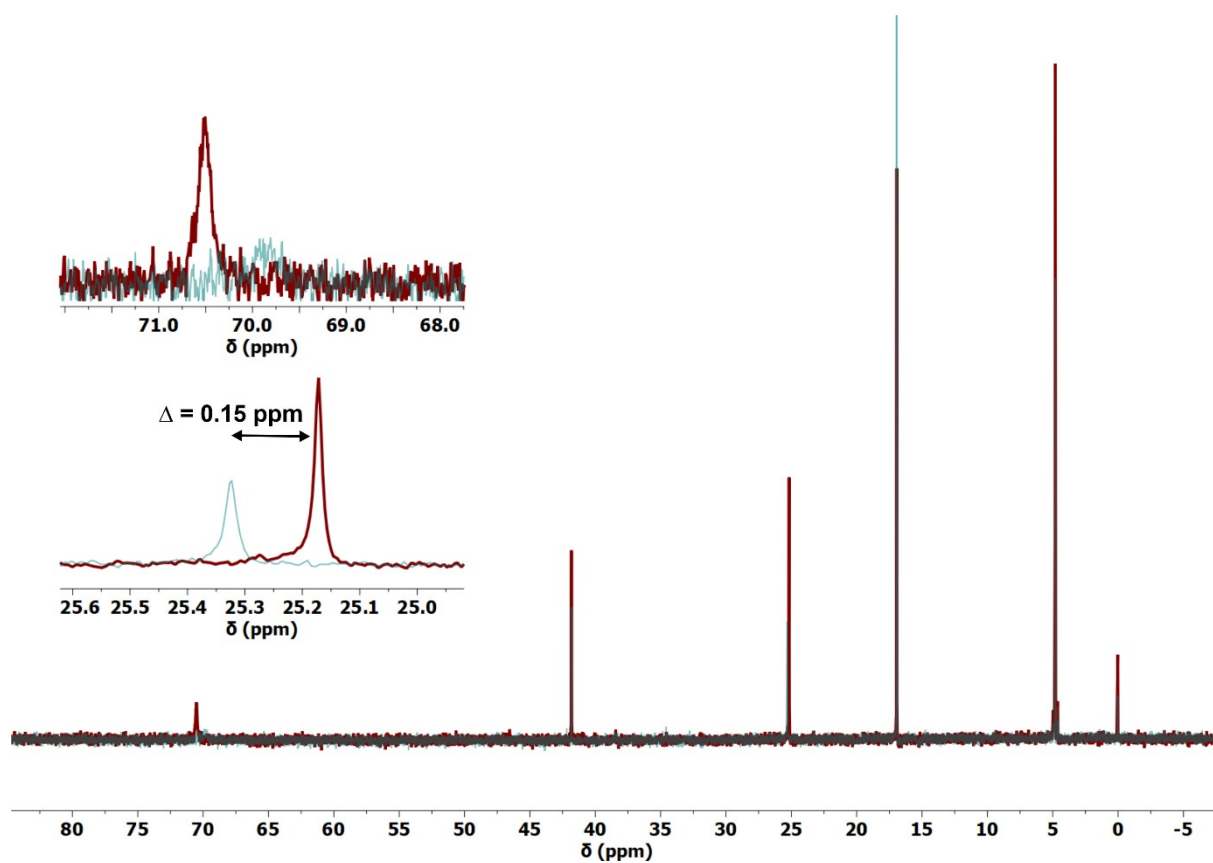

**Figure S 62** Superimposed  $^{13}\text{C}$  NMR spectra of  $\text{Lu}(\text{CH}_2\text{Si}(\text{CH}_3)_3)_3(\text{THF})_2$  in the absence (red) and presence of 1eq. LiCl (cyan) showing impact of LiCl concentration on the  $^{13}\text{C}$  NMR shifts of the  $\beta$ - &  $\gamma$ - $\text{CH}_2$  resonances in THF.

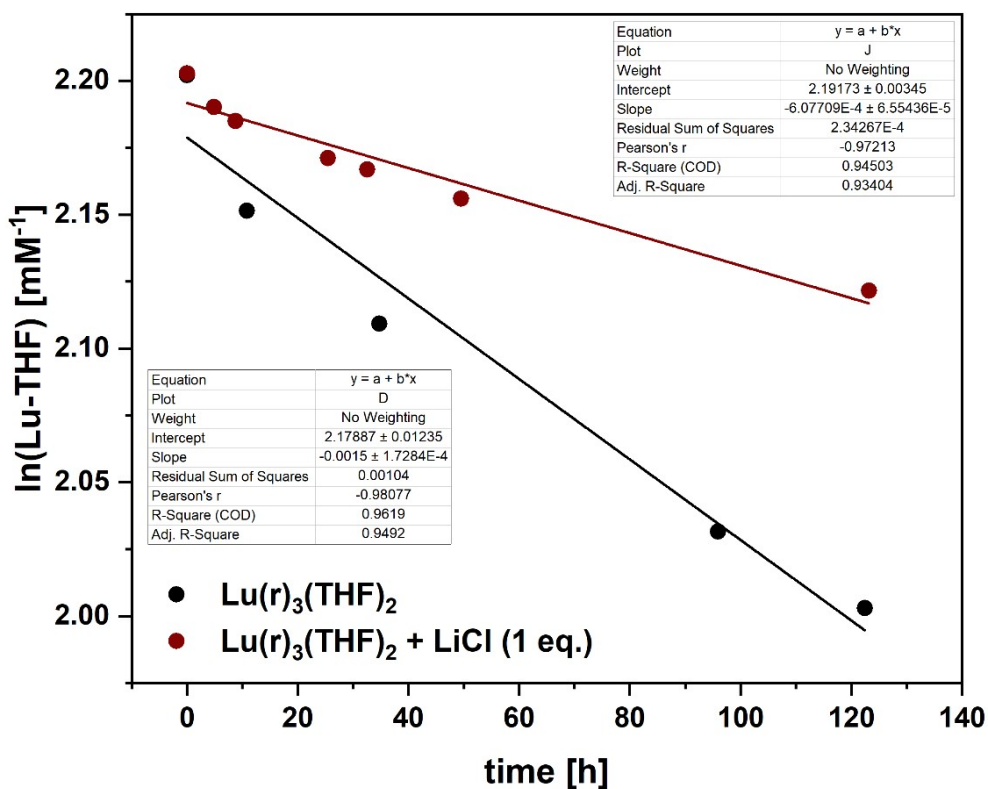

**Figure S 63** Thermal stability of  $\text{Lu}(\text{CH}_2\text{Si}(\text{CH}_3)_3)(\text{THF})_2$  (**Lu-THF**) in the absence (black) and in the presence of 1 equivalent  $\text{LiCl}$  (red) expressed by the decrease of  $\text{Lu}(\text{r})_3(\text{THF})_2$  concentration as a function of time using the logarithmic  $\text{Lu}(\text{r})_3(\text{THF})_2$  concentration values obtained from the NMR integration values after incubation in  $\text{C}_6\text{D}_6$ , room temperature ( $30^\circ\text{C}$ ). The functions are described by the linear fits ( $R^2 = 0.96$ ):  $\ln([\text{Lu}(\text{r})_3(\text{THF})_2]) = -1.5 (\pm 0.2) \times 10^{-3} x + 2.18$  and ( $R^2 = 0.95$ ):  $\ln([\text{Lu}(\text{r})_3(\text{THF})_2] + 1 \text{ eq. LiCl}) = -6.1 (\pm 0.7) \times 10^{-4} x + 2.19$ , respectively, with  $x$  being the incubation time in h. The slope of the linear fit gives the rate constants  $k_1 = -1.5 (\pm 0.2) \times 10^{-3}$  and  $k_2 = -6.1 (\pm 0.7) \times 10^{-4}$ .



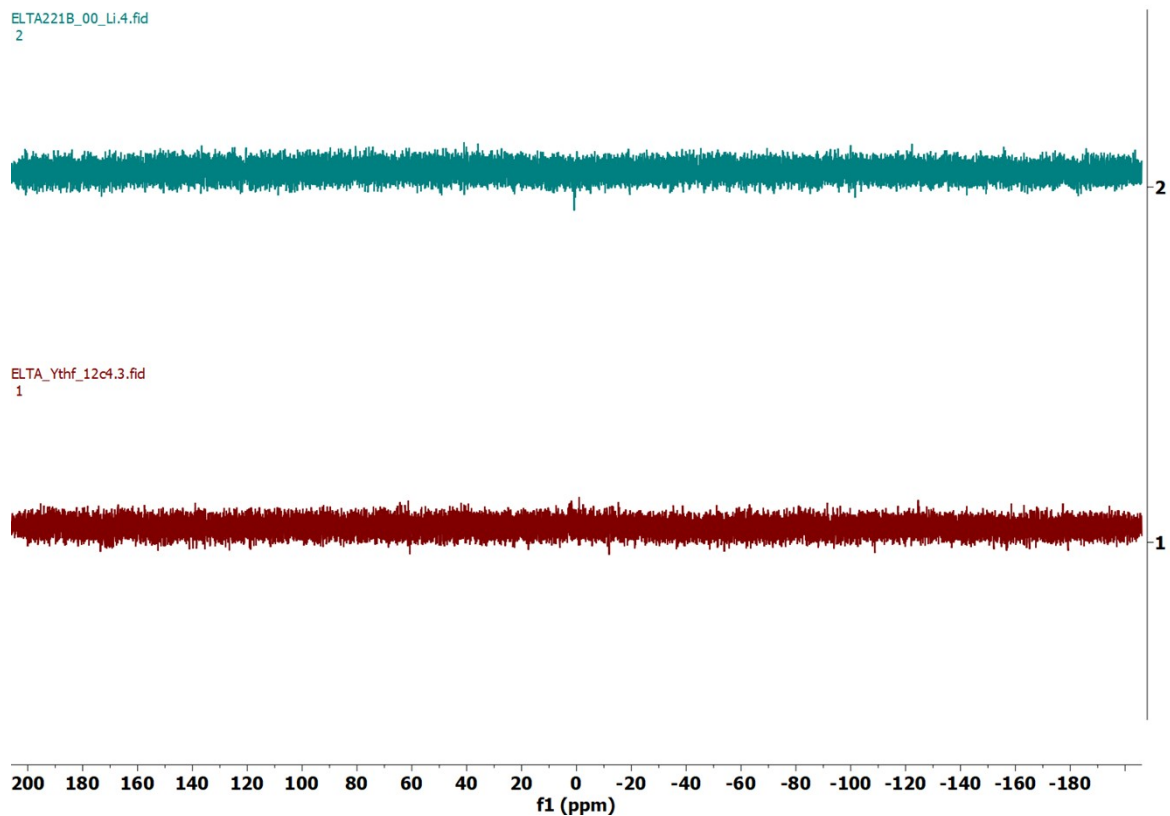

**Figure S 64** Stacked  $^7\text{Li}$  NMR spectra (156 MHz,  $\text{C}_6\text{D}_6$ ) of  $\text{Y}(\text{r})_3(\text{THF})_2$  prepared from Nar (this work) in the absence (red) and in the presence (cyan) of an equimolar amount of 12-crown-4 ether demonstrating the complex bulk is lithium free.

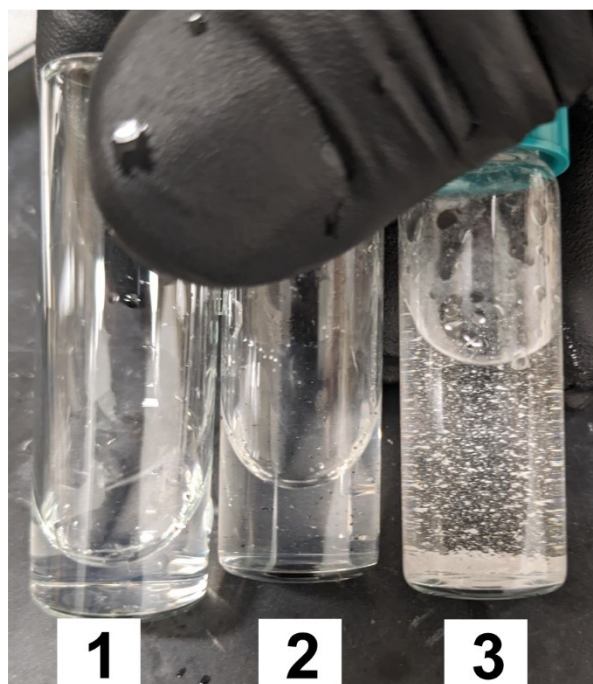

**Figure S 65** Qualitative  $\text{Cl}^-$  test showing no  $\text{AgCl}$  formation in the case of  $\text{H}_2\text{O}$  (1, as a blank acidified with conc.  $\text{HNO}_3$ ),  $\text{Y}(\text{r})_3(\text{THF})_2$  (2, prepared starting from Nar after digestion with  $\text{H}_2\text{O}$  acidified with conc.  $\text{HNO}_3$ ), and  $\text{AgCl}$  precipitates for  $\text{Li}[\text{YCl}(\text{r})_3(\text{THF})_2]$  (3, after digestion with  $\text{H}_2\text{O}$  acidified with conc.  $\text{HNO}_3$ ).

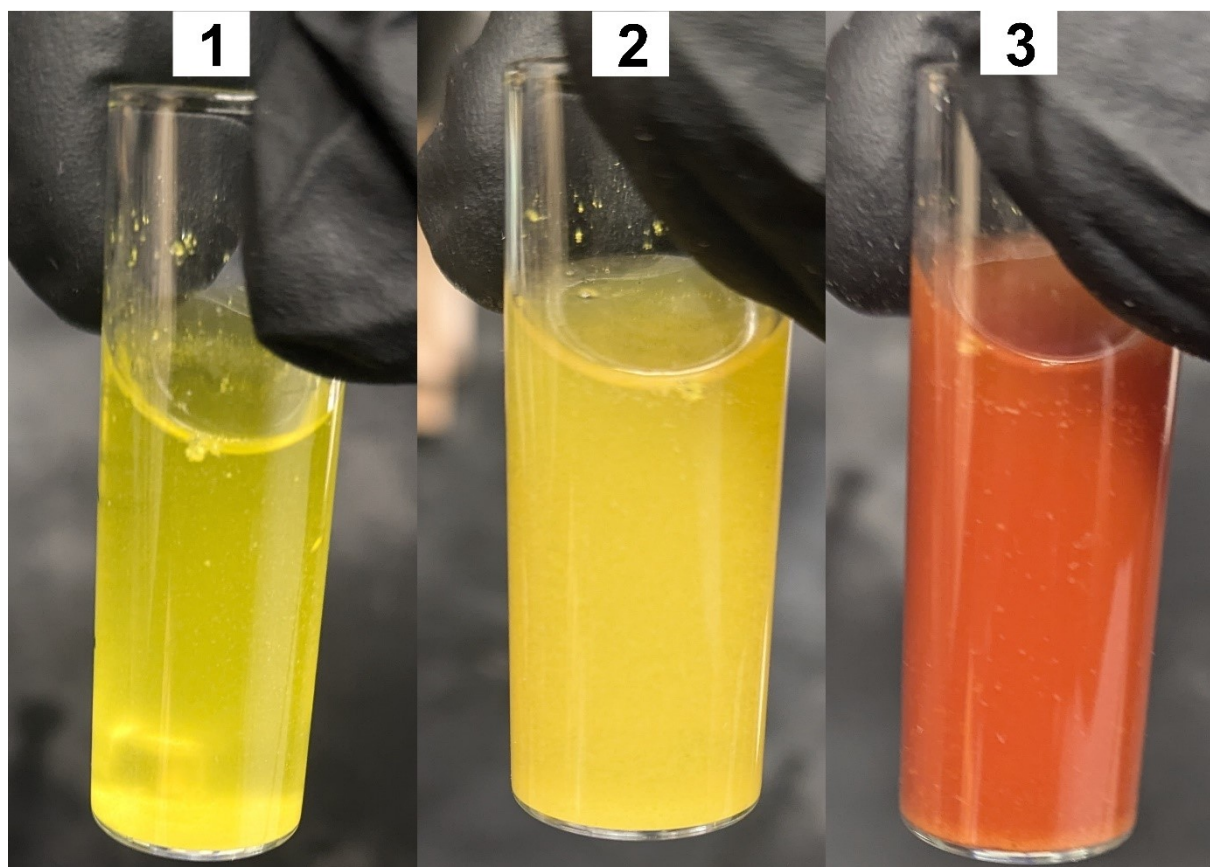

**Figure S 66** Quantitative  $\text{Cl}^-$  test using Mohr's method showing an aqueous solution of **Y-THF** prepared from  $\text{Li}(r)$  ( $\text{Li}[\text{YCl}(r)_3(\text{THF})_2]$ ) in the presence of  $\text{K}_2\text{CrO}_4$  (**1**). Dropwise addition of an aqueous  $\text{AgNO}_3$  solution results in gradual  $\text{AgCl}$  precipitation (**2**) followed by formation of red  $\text{Ag}_2\text{CrO}_4$  at the endpoint of the titration (**3**).

## 7. References

1. H. Schumann, D. M. Freckmann and S. Dechert, *Zeitschrift für anorganische und allgemeine Chemie*, 2002, **628**, 2422-2426.
2. S.-M. Chen, Y.-Q. Zhang, J. Xiong, B.-W. Wang and S. Gao, *Inorganic Chemistry*, 2020, **59**, 5835-5844.
3. K. A. Rufanov, D. M. M. Freckmann, H.-J. Kroth, S. Schutte and H. Schumann, *Zeitschrift für Naturforschung B*, 2005, **60**, 533-537.
4. A. G. B. Getsoian, B. Hu, J. T. Miller and A. S. Hock, *Organometallics*, 2017, **36**, 3677-3685.
5. A. Mortis, C. Maichle-Mössmer and R. Anwander, *Dalton Transactions*, 2022, **51**, 1070-1085.
6. O. V. Dolomanov, L. J. Bourhis, R. J. Gildea, J. A. Howard and H. Puschmann, *Journal of applied crystallography*, 2009, **42**, 339-341.
7. G. M. Sheldrick, *Acta Crystallographica Section A: Foundations and Advances*, 2015, **71**, 3-8.
8. R. Clark and J. Reid, *Acta Crystallographica Section A: Foundations of Crystallography*, 1995, **51**, 887-897.
9. J. W. Bruno, G. M. Smith, T. J. Marks, C. K. Fair, A. J. Schultz and J. M. Williams, *Journal Of The American Chemical Society*, 1986, **108**, 40-56.
10. P. E. Hansen, *Progress in Nuclear Magnetic Resonance Spectroscopy*, 1988, **20**, 207-255.
11. S. C. Kosloski-Oh, K. D. Knight and M. E. Fieser, *Inorganic Chemistry*, 2023, DOI: 10.1021/acs.inorgchem.3c03161.
12. G. Cai, Y. Huang, T. Du, S. Zhang, B. Yao and X. Li, *Chemical Communications*, 2016, **52**, 5425-5427.
13. S. Arndt, P. M. Zeimentz, T. P. Spaniol, J. Okuda, M. Honda and K. Tatsumi, *Dalton Transactions*, 2003, 3622-3627.
